# Supplementary material
Source: PubMed Central journal article supplement (PMC5669044)
Supplement: NIHMS912716-supplement-supplement_1.pdf [file NIHMS912716-supplement-supplement_1.pdf]

## SUPPLEMENTAL MATERIAL

### SUPPLEMENTAL METHODS:

**Fly stocks:** To study long-term effects of hypoxia, we used three *Drosophila* populations, selected over more than 250 generations for survival at 4% O<sub>2</sub> ('hypoxia selected,' HS), a level that is normally developmentally lethal. Three distinct and genetically isolated populations, maintained in parallel with HS flies but under normoxia for over 250 generations, were used as the appropriate outbred, unselected control populations for HS ('normoxia controls', NC; see <sup>1,2</sup>). 3-week-old, male HS and NC flies were used for cardiac function studies. 3-week-old, female *w*<sup>1118</sup> flies were used as the appropriate wildtype background for cardiac function assessments in response to genetic manipulations and chronic hypoxia exposure (CH). Within genotypes, there were no differences observed in baseline heart parameters between male and female flies, except in diameters (see also <sup>3</sup>).

Specific knockdown of genes was achieved using the Gal4 system, which allows tissue-specific expression of Gal4 and induction or knockout of genes by binding an upstream activation sequence (UAS) of the gene of interest <sup>4,5</sup>. We used two cardiac-specific drivers, TinCΔ4-Gal4, Hand4.2-Gal4 and SNS-Gal4, to modulate gene expression in myocardial cells only ('TinC'), myocardial and pericardial cells ('Hand4.2') or in pericardial cells ('SNS') <sup>17,50</sup>. See also Figure 4A for illustration of cellular arrangements.

UAS-RNAi lines were used for knockdown gene expression: v109858 ('CanA14F-RNAi KK') and v103144 ('PP2B-RNAi KK') from the Vienna *Drosophila* Resource Center (<http://stockcenter.vdrc.at/control/main>). v60100 (*y,w[1118];P{attP,y[+],w[3]}*, 'KK control') were crossed to Gal4 drivers as appropriate UAS-RNAi control lines, and used for the control comparisons within each experiment. #22025 ('UAS-Pp2B') was obtained from Bloomington

**qPCR validation of cardiac gene expression:** Total RNAi was isolated from 15 fly hearts per sample in quadruplicate with a Qiagen RNeasy Isolation kit as per manufacturer's protocol. Total RNA (15-30 ng) was quantified and checked for purity using a Nanodrop® spectrophotometry. RNA was subsequently reverse-transcribed using a QuantiTect® Reverse Transcription Kit as per manufacturer's protocol. Primers were designed using Perl Primer® software and provided by IDT®. Annealing temperature of the primers was optimized and primer efficiency determined. The qPCR experiments were carried out using the Roche® FastStart Essential DNA Green Master ® kit with a Roche® LightCycler® 96. Housing keeping gene RPL-32 was used as a control. Primer sequences:

CanA14f: F-GCTGATCACCATCTTCTCGG R-GCACGTTACCAACATCTC.

Pp2B-14D: F-GCTGATCACCATCTTCTCGG R-GCACGTTACCAACATCTC.

CanB: F-CAAGCTGGATCTGGACAACT R-CACCATCATCTTGAGCACCT.

CanB2: F-GTGTTCOAATTTGACGCC R-TGTAACCATCGTTGTCCATGT.

**Heart function analysis experiments:** Semi-intact hearts were dissected and equilibrated under normoxia conditions as previously described <sup>3,6</sup>. Exposed hearts were perfused with artificial hemolymph bubbled with room air and filmed under 21% O<sub>2</sub>. Dissolved O<sub>2</sub> content was monitored and recorded using a Qubit Systems OX1LP polarographic oxygen probe, calibrated and corrected for mean barometric pressure (758 mm Hg), salinity (8.2‰) and perfusate temperatures (21-22°C). The O<sub>2</sub> content was monitored at several timepoints during experimental sessions. To ensure that all genotypes received equivalent treatments, each experiment dish contained small numbers of both control and experimental heart preparations. HS or CH exposed flies were transported using a humidified chamber (Modular Incubator Chamber, MIC 101, Billups-Rothenberg) filled with calibrated 4% O<sub>2</sub> and kept at room temperature.

**Heart function assays for hypoxia-selected (HS) fly populations:** Heart function in HS and NC flies was analyzed using 3-week-old males. HS flies were removed from the 4% O<sub>2</sub> hypoxia chamber, briefly dissected under reduced oxygen conditions (hemolymph under stream of 4% O<sub>2</sub> duration <15 minutes), then returned to their 'native' 4% O<sub>2</sub> to equilibrate for 30 minutes prior to filming under 4% O<sub>2</sub> conditions (as in <sup>3</sup>). To control for possible long-lasting effects of relatively elevated O<sub>2</sub> exposure during dissection of HS flies, we monitored heart function in both populations under their 'relative normoxia' condition (4% for HS or 21% O<sub>2</sub> for CH) at two timepoints (60 and 90 minutes) after dissection. Flies exhibited similar cardiac parameters at these timepoints, thus we used the average of the two measures as our values for baseline cardiac response at 'relative' normoxia for HS and CH, with appropriately timepoint-matched controls.

**Heart function assays for chronic hypoxia (CH)-exposed flies:** As previously described, we chose 3 weeks as the exposure period for the chronic hypoxia challenge, as this is the median age for *w<sup>1118</sup>* adult flies and heart function is only moderately affected by aging <sup>19</sup>. At 4% O<sub>2</sub> adult flies can live a near normal lifespan <sup>20</sup>, although they cannot reproduce (except HS flies <sup>1,2</sup>). Two- to three-day old adult flies were placed in sealed, humidified chambers at room temperature for 3 weeks under 4% O<sub>2</sub> with daily gas exchanges (as in <sup>20</sup>). Food (equilibrated for 24 hours at 4% O<sub>2</sub>) was changed two times per week under hypoxic conditions. After 3 weeks,

HS or CH flies were removed from the chamber, dissected under normoxic conditions and equilibrated for 30 minutes in artificial hemolymph at 21% O<sub>2</sub> (NC and CH flies, and in all gene knockdown experiments), or at 4% O<sub>2</sub> (HS flies) prior to filming.

**Statistical analysis:** All statistical analyses were performed using Prism Statistical Software (Graph Pad, Inc). Data sets were first tested for normal (Gaussian) distributions using the D'Agostino and Pearson omnibus normality test. For data sets that passed this test, we used t-test, 1- or 2-way ANOVA, as appropriate. Most of the studies used two or more genotypes and two experimental conditions (normoxia vs. hypoxia), where significance was determined using a 2-way ANOVA followed by multiple comparisons post hoc tests, as appropriate (specific tests indicated in figure legends). Data sets that did not show a normal distribution (heart period and diastolic interval) were analyzed for significance using a nonparametric two-tailed t-test, or Kruskal–Wallis test followed by Dunn multiple comparisons post hoc tests, as appropriate (specific tests indicated in figure legends). We excluded hearts that did not beat after exposure to hypoxia (N<1% of total dataset, controls and experimental groups) or if cardiac parameters were outlier and fell outside 2 standard deviations of the population. In all cases, p<0.05 was taken as significant. In Supplemental Figures 3 and 4, a t-test was performed.

## Supplemental References:

1. Zhou D, Xue J, Chen J, Morcillo P, Lambert JD, White KP, et al. Experimental selection for *Drosophila* survival in extremely low O<sub>2</sub> environment. *PLoS One*. 2007;2:e490.
2. Zhou D, Udpa N, Gersten M, Visk DW, Bashir A, Xue J, et al. Experimental selection of hypoxia-tolerant *Drosophila melanogaster*. *Proc Natl Acad Sci U S A*. 2011;108:2349–2354.
3. Zarndt R, Piloto S, Powell FL, Haddad GG, Bodmer R, Ocorr K. Cardiac responses to hypoxia and reoxygenation in *Drosophila*. *Am J Physiol - Regul Integr Comp Physiol*. 2015;309:R1347–R1357.
4. Duffy JB. GAL4 system in *Drosophila*: a fly geneticist's Swiss army knife. *Genes N Y N* 2000. 2002;34:1–15.
5. Vogler G, Bodmer R, Akasaka T. *Drosophila* Model of Congenital Heart Diseases. In: Rao PS, editor. Congenital Heart Disease - Selected Aspects. 2012. p. 1–18.
6. Ocorr K, Vogler G, Bodmer R. Methods to assess *Drosophila* heart development, function and aging. *Methods*. 2014;68:265–272.
7. Lee S, Bao H, Ishikawa Z, Wang W, Lim H-Y. Cardiomyocyte Regulation of Systemic Lipid Metabolism by the Apolipoprotein B-Containing Lipoproteins in *Drosophila*. *PLOS Genet*. 2017;13:e1006555.

**Supplemental Figure 1: Cardiac-specific genes differentially expressed in hypoxia-selected and chronic hypoxia exposed fly populations.**

**Supplemental Figure 2: Hypoxia-dependent shift toward glycolysis and triglyceride storage in hypoxia-selected (HS) fly hearts, and towards anaerobic glucose oxidation in chronic hypoxia (CH) exposed fly hearts.**

**Supplemental Figure 3: Differential expression in *Drosophila* Calcineurin gene network**

**Supplemental Figure 4: Effect of pericardial-specific knockdown of Calcineurin A on heart function.**

**Supplemental Table 1 – Total of 449 upregulated genes and 622 downregulated genes in hearts from hypoxia-selected flies compared to normoxia controls.**

**Supplemental Table 2 – Total of 267 upregulated and 396 downregulated genes in chronic hypoxia hearts compared to *w<sup>1118</sup>* controls.**

**Supplemental Table 3 – Venn Analysis Between CH and HS Flies**

**SUPPLEMENTAL FIGURE 1: Cardiac-specific genes differentially expressed in hypoxia-selected and chronic hypoxia exposed fly populations.**

**Supplemental Figure 1A:** Differentially expressed genes in the heart of *Drosophila* exposed to chronic hypoxia (during adulthood) - or - selected for hypoxia tolerance over many generations (>250).

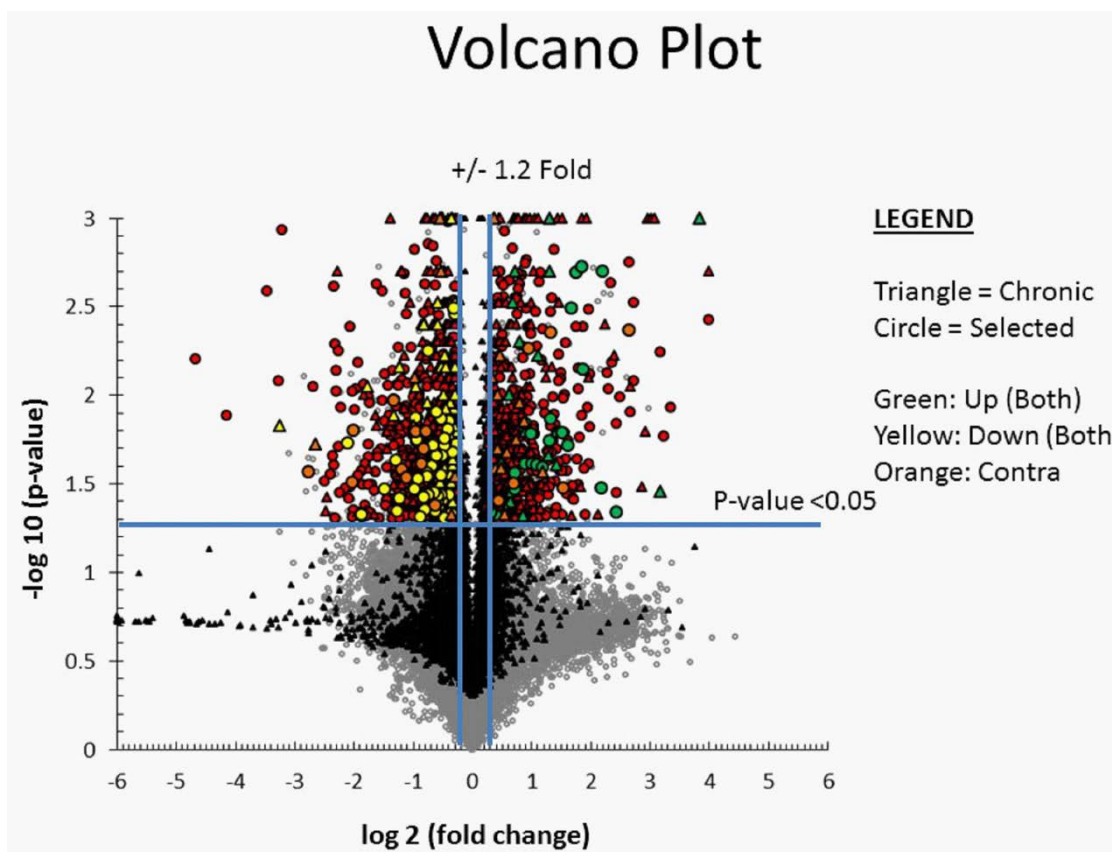

**Supplemental Figure 1B: Differentially expressed genes in *w<sup>1118</sup>* *Drosophila* exposed to chronic hypoxia (CH) compared to their normoxia-raised controls by cardiac-specific RNAseq.**

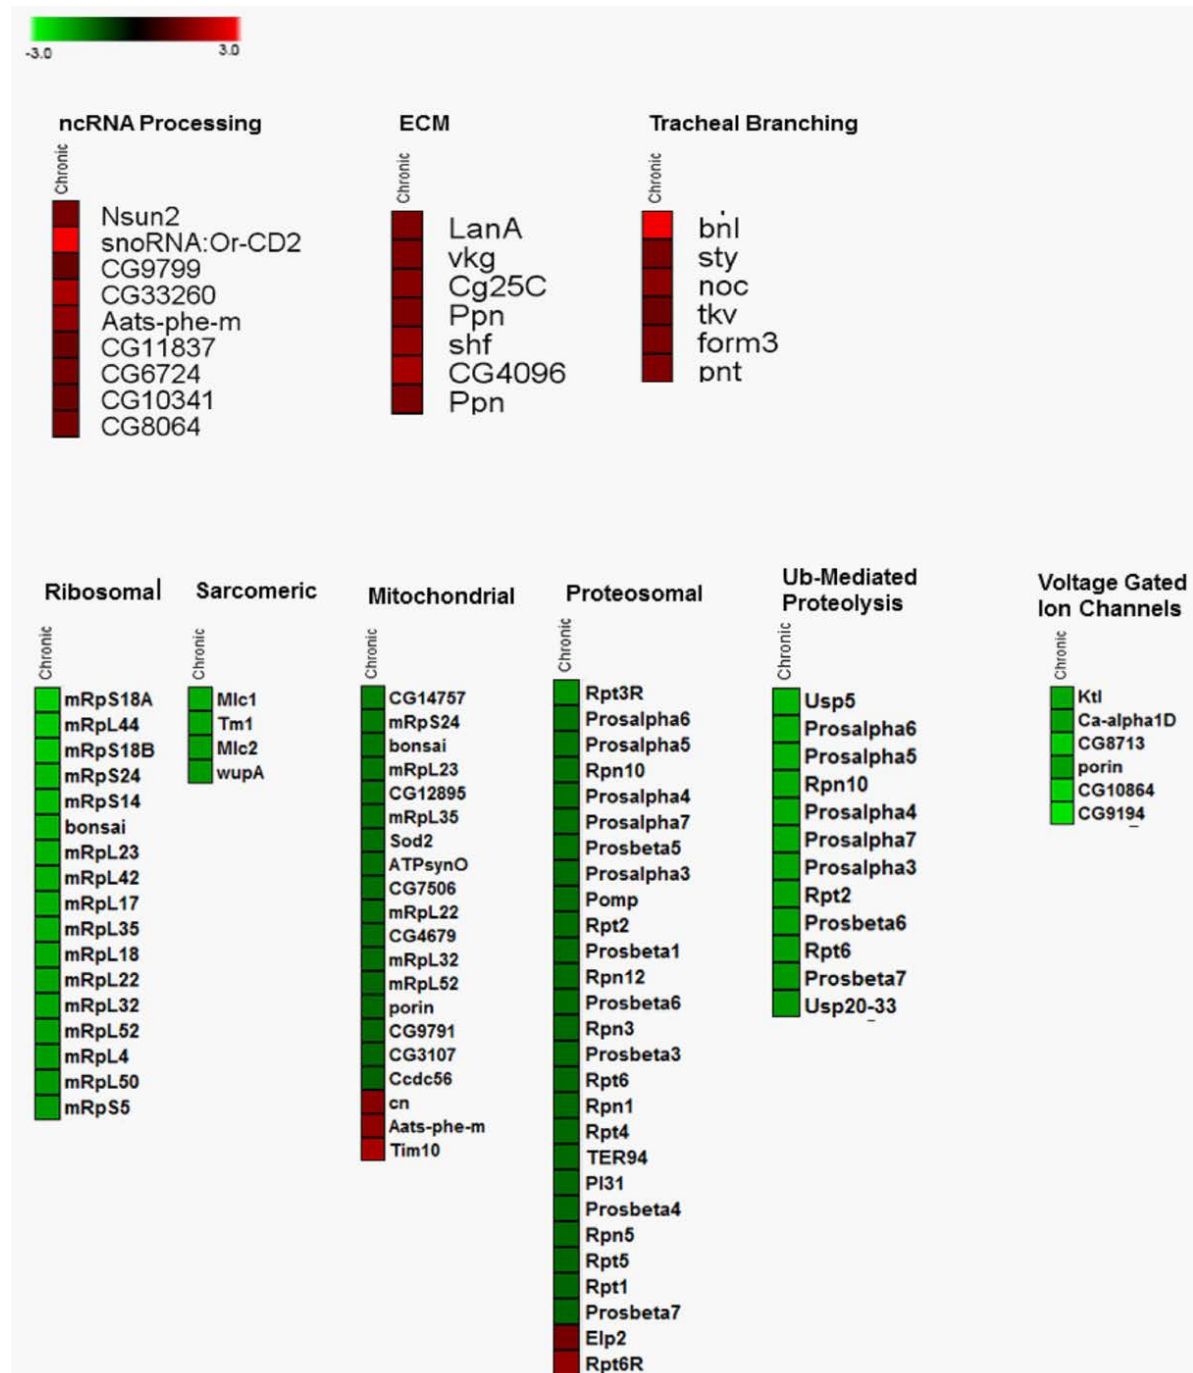

**Supplemental Figure 1C: Differentially expressed genes in the heart of hypoxia-selected (HS) fly populations (>250 generations) compared to their control populations (NC) by microarrays.**

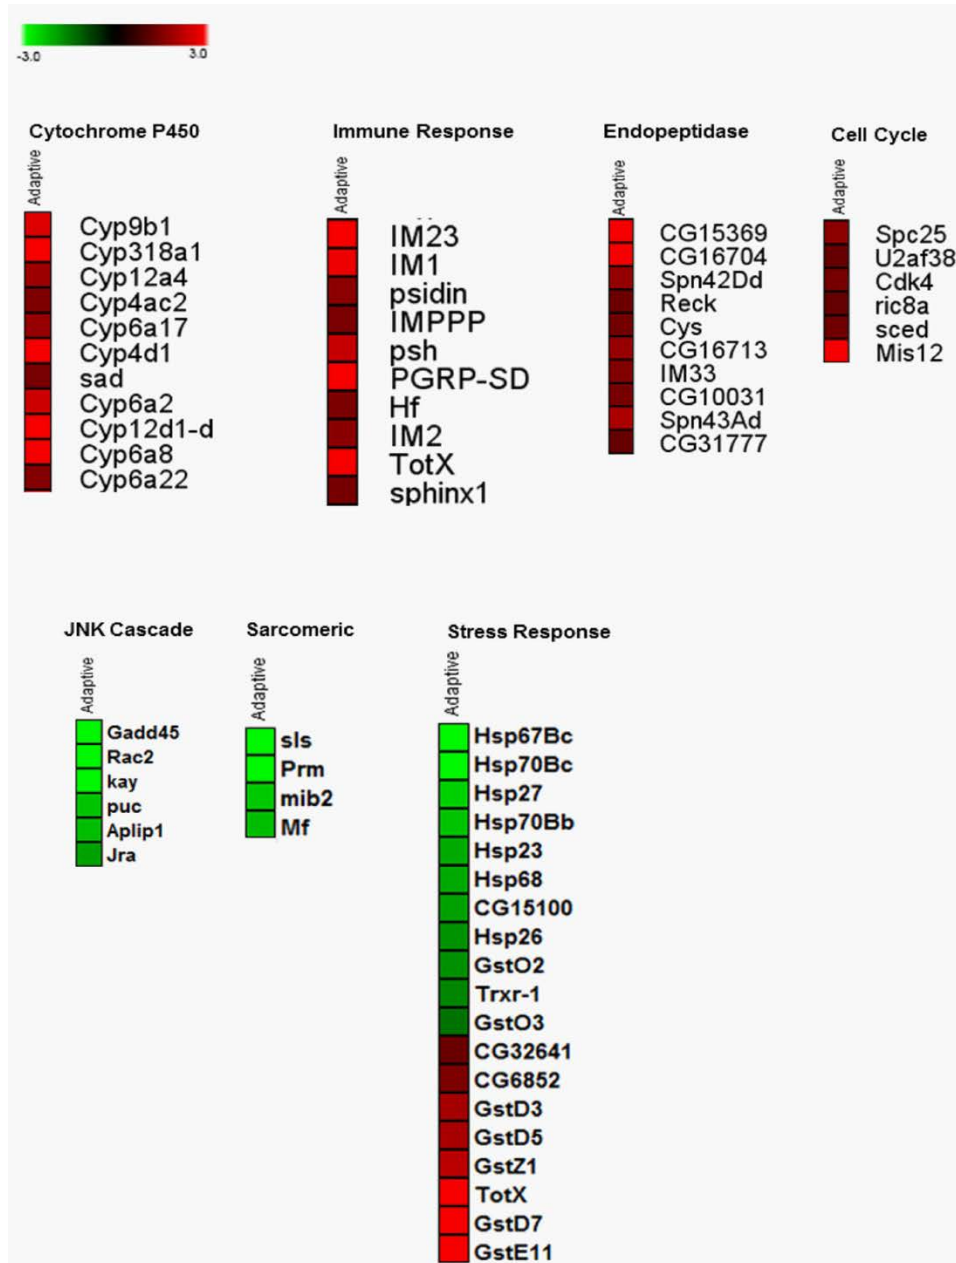

**Supplemental Figure 1: Differentially expressed genes in the heart of hypoxia-selected and chronic hypoxia-exposed *Drosophila*.** Cardiac-specific transcriptome analysis (from myocardial and pericardial cells) for differential gene expression in hypoxia-selected flies (HS) compared to chronic hypoxia-exposed *w<sup>1118</sup>* flies (CH). **A)** Volcano plot for relative log<sub>2</sub> fold-change expression from HS vs. CH flies between genes found >1.2 fold up-regulated (red) or >1.2 fold down-regulated (green) in both populations or contra-regulated between the populations (orange). Transcriptome changes in the hearts of HS flies are open circles, and in the hearts of CH-exposed hearts are triangle points. **B)** Differentially expressed genes in the hearts of CH flies that are not found differentially expressed in the hearts of HS flies. Gene families are grouped by KEGG and DAVID ontologies by biological processes: non-coding RNA processing, extra-cellular matrix (ECM), tracheal branching (up-regulated); ribosomal function, sarcomeric function, mitochondrial function, proteosomal function, ubiquitin-mediated proteolysis and voltage-gated ion channels (mainly down-regulated). **C)** Differentially expressed genes in the hearts of HS flies compared to the hearts of NC flies. Gene families are grouped by KEGG and DAVID ontologies by biological processes: Cytochrome P450, immune response, endopeptidase function, cell cycle, JNK sarcomeric function, and the stress response.



**Supplemental Figure 2:** Hypoxia-dependent shift toward glycolysis and triglyceride storage in hypoxia-selected (HS) fly hearts, and towards anaerobic glucose oxidation in chronic hypoxia (CH) exposed fly hearts.

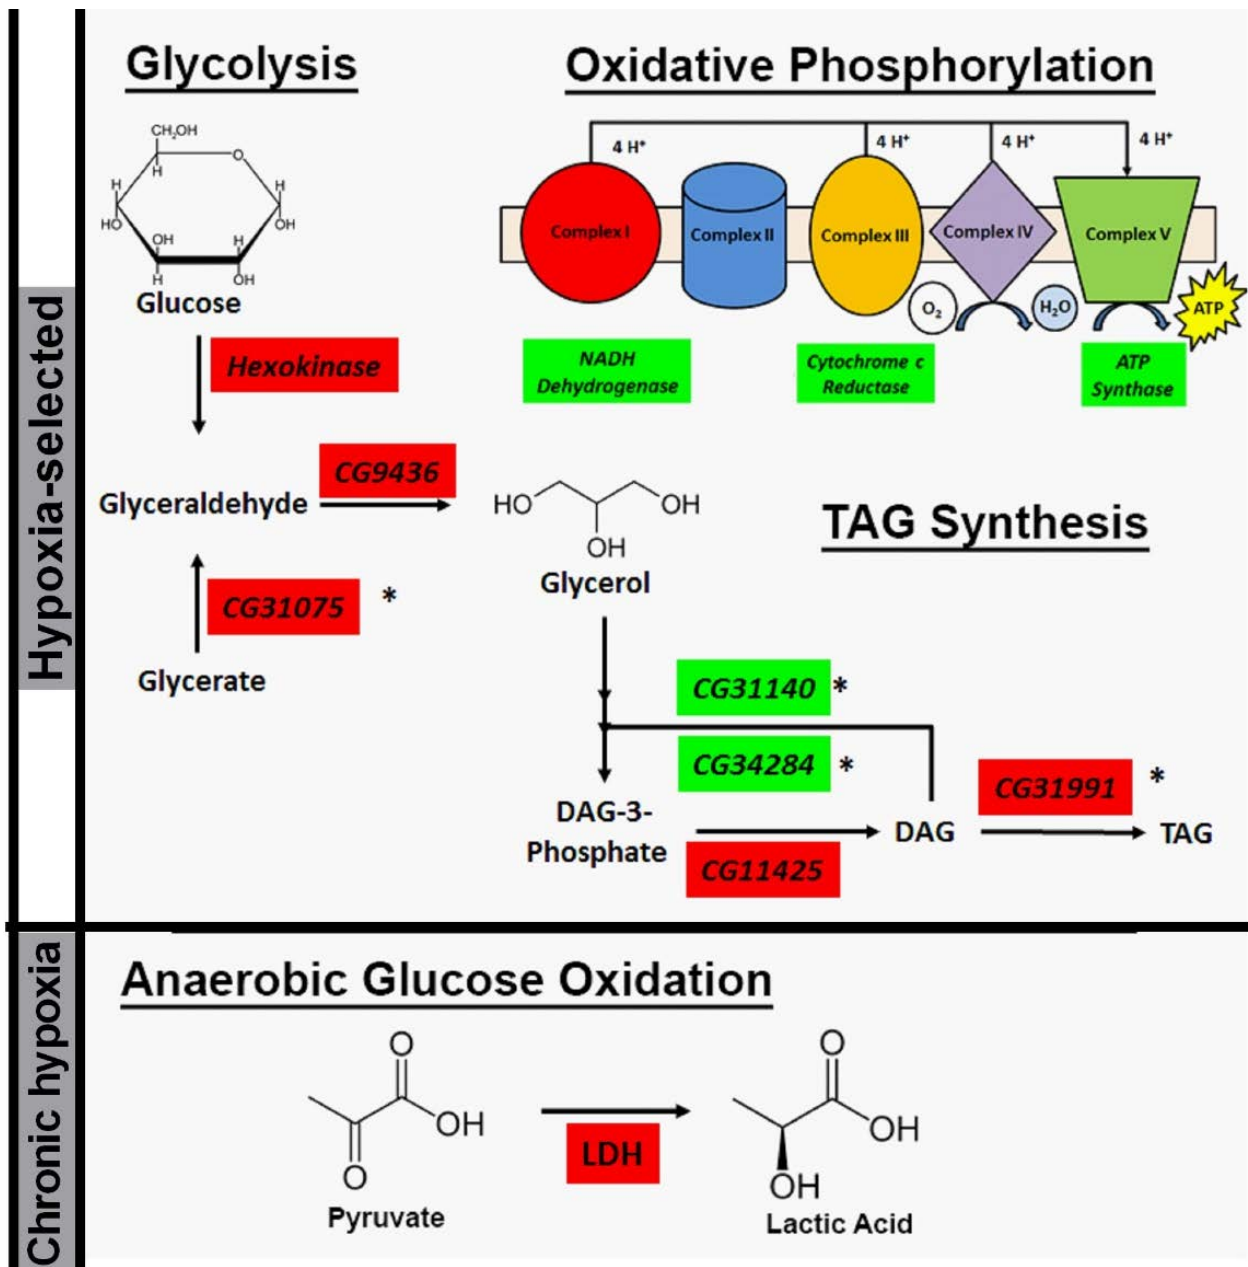

**Supplemental Figure 2:** Pathway analysis suggests a shift toward glycolysis and triglyceride storage in HS fly hearts, and towards anaerobic glucose oxidation in CH-exposed flies. (top) Cardiac microarrays of HS flies suggest a shift towards elevated expression of genes involved in glycolysis and triglyceride synthesis and decreased expression of genes involved in fatty acid oxidation. (bottom) Hearts from CH exposed flies showed increased expression of lactate dehydrogenase, suggesting a shift toward anaerobic metabolism.

**Supplemental Figure 3: Differential expression in *Drosophila* Calcineurin gene network.**

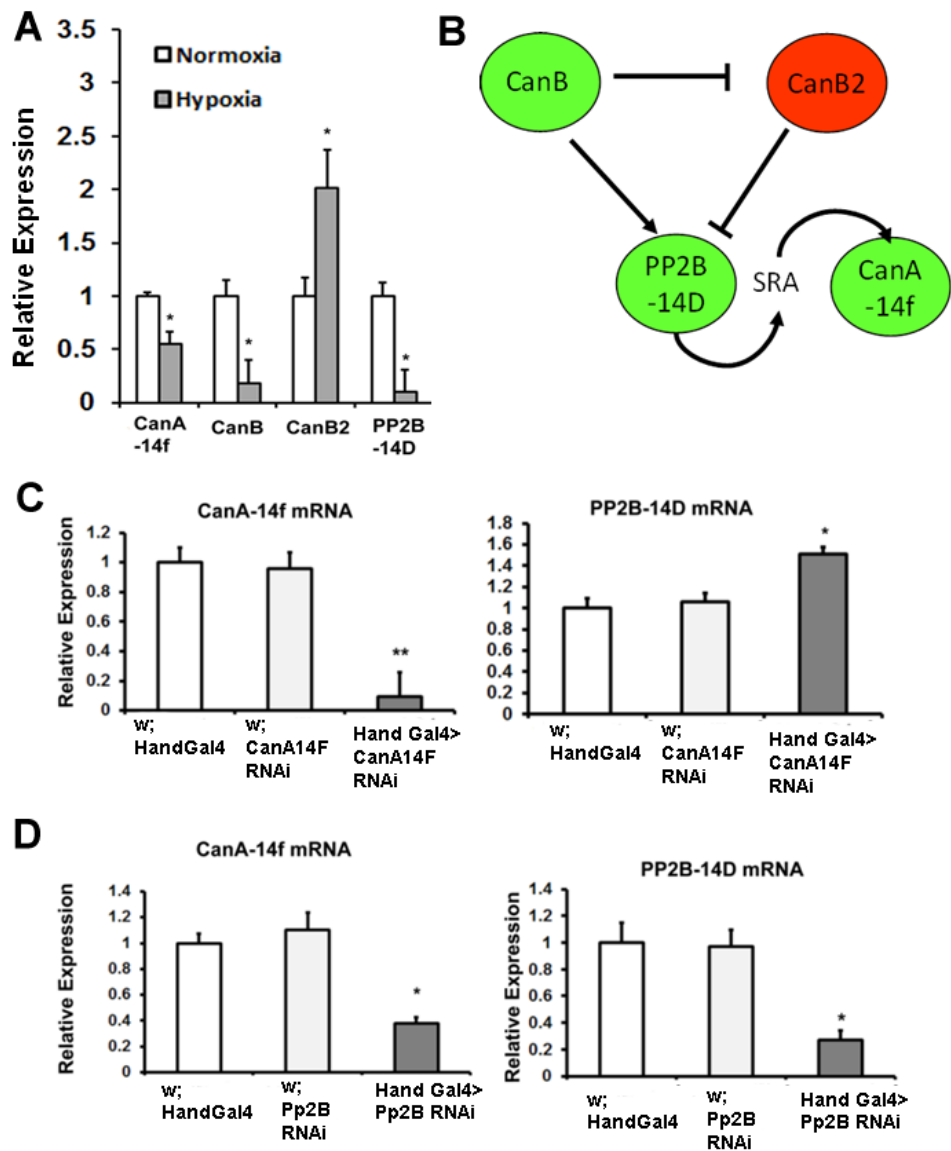

**Supplemental Figure 3: Calcineurin Network Genes.** A) Chronic Hypoxia (CH) induces differential expression of calcineurin network genes (qPCR relative expression). White bars: Normoxia grey bars: chronic hypoxia. These results validated those observed in the RNA seq experiment (Figure 2B). B) Putative Calcineurin network adapted from ExPasy as listed at [www.flybase.org](http://www.flybase.org). Green: downregulation, Red: upregulation of expression. C) CanA14F and D) Pp2B heart-specific knockdowns. Expression of CanA14F and Pp2B was measured in the hearts of each KD line. (N=15 hearts/sample in quadruplicate). Data analysis: t-test \*p<0.05.; \*\*p<0.01.

**Supplemental Figure 4: Effect of pericardial-specific knockdown of Calcineurin A on heart function.**

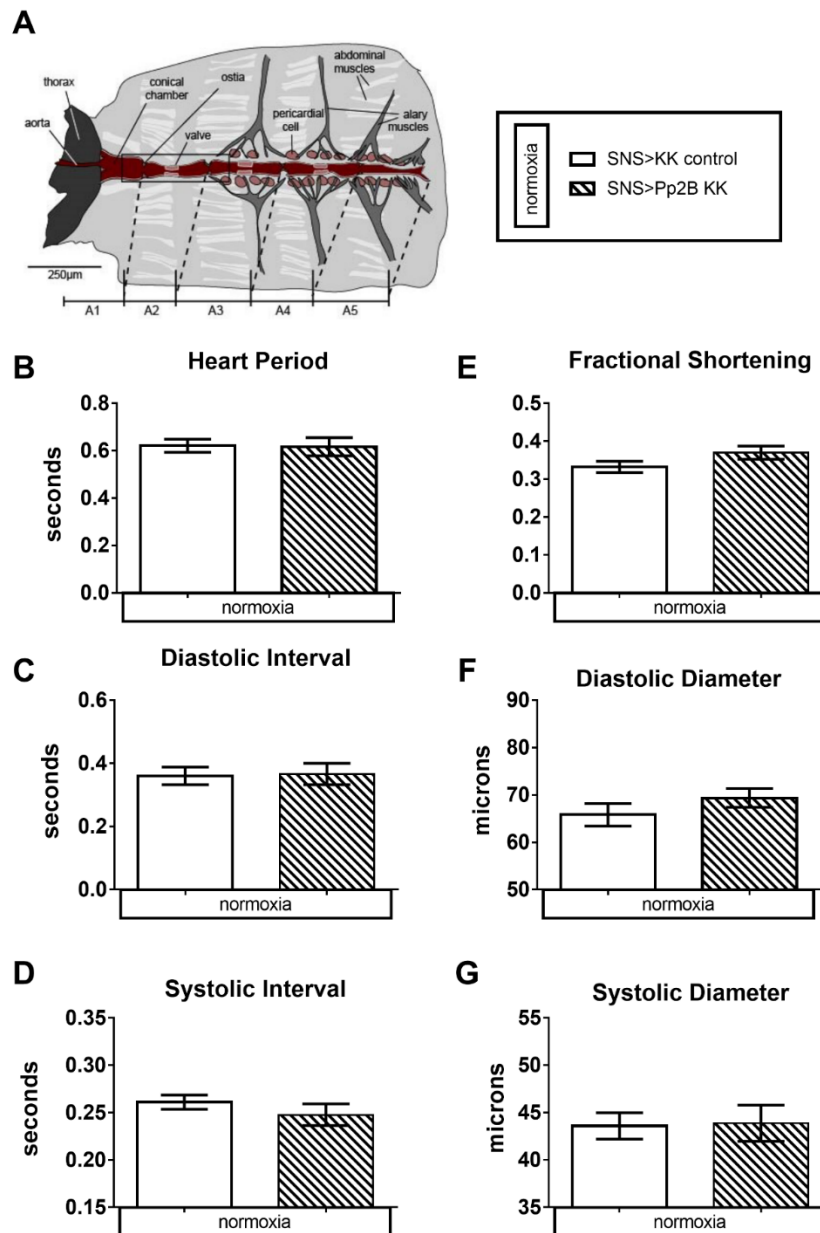

**Supplemental Figure 4: Effect of pericardial-specific knockdown of Pp2B on heart function.** Heart function data was assessed under normoxia using the pericardial-specific driver SNS-Gal4<sup>7</sup> to knockdown expression of Pp2B (SNS>Pp2B-RNAi), compared to control (SNS>KK control). A) Diagram of *Drosophila* heart tube within dissected abdominal preparation (adapted from<sup>5</sup>), illustrating pericardial cells selectively expressed with SNS-Gal4 driver. No statistical significance was observed in B) heart period, C) diastolic interval D) systolic interval, E) fractional shortening, F) diastolic diameter or G) systolic diameter. Data analysis: t-test \* $p < 0.05$ . SNS>KK control N=24, SNS>Pp2B-RNAi N=19.

# Supplemental Table 1. Differential Expression of Hypoxia Selected Transcriptome

| Probesets    | Symbol                  | Ensembl_id   | fold-Selected_vs_Control | rawp-Selected_vs_Control |
|--------------|-------------------------|--------------|--------------------------|--------------------------|
| 1626129_at   | 5-HT1B                  | FBgn0004572  | 2.026637884              | 0.054847829              |
| 1633746_s_at | a                       | FBgn0026088  | -1.400678261             | 0.005282584              |
| 163944_4_at  | Aats-ala                | FBgn0027094  | -1.392431799             | 0.053040898              |
| 1624475_at   | Aats-asn                | FBgn0086443  | -1.450013836             | 0.033248677              |
| 1631877_a_at | Aats-his                | FBgn0027087  | -1.315082523             | 0.017828071              |
| 1623466_at   | Aats-ieu                | FBgn0027085  | -1.511287705             | 0.005249414              |
| 1629702_a_at | ab                      | FBgn0000111  | -1.690259328             | 0.033561617              |
| 1624840_at   | Acp29AB                 | FBgn0015583  | 1.416123086              | 0.037994223              |
| 1631158_at   | Acp53C14a               | FBgn0034152  | -1.590066199             | 0.013161608              |
| 1634882_at   | Acp63F                  | FBgn0015585  | 1.902937704              | 0.027083011              |
| 1635252_a_at | Actn                    | FBgn0034067  | -1.581384277             | 0.015806428              |
| 1640621_at   | ACXB                    | FBgn0040509  | 1.449642007              | 0.020041781              |
| 1624636_at   | ACXD                    | FBgn0040507  | -4.247262667             | 0.006666609              |
| 1629194_s_at | ade2                    | FBgn0000052  | 1.425024553              | 0.048911771              |
| 1640599_at   | ade5                    | FBgn0020513  | 1.797113673              | 0.02229292               |
| 1624054_at   | Adgf-A                  | FBgn0036752  | 1.41837597               | 0.025387362              |
| 1634216_at   | Adgf-C                  | FBgn0038173  | 2.024564585              | 0.044965222              |
| 1638877_at   | AdpR                    | FBgn0039747  | 1.74084772               | 0.019684586              |
| 1639904_at   | agt                     | FBgn0024912  | 1.443145405              | 0.037362556              |
| 1629222_at   | Ahcy13                  | FBgn0014455  | 1.603693383              | 0.041889671              |
| 1626985_a_at | Alf                     | FBgn0031392  | -1.260455338             | 0.032218644              |
| 1634293_at   | Alg-2                   | FBgn0086678  | 1.86552712               | 0.002456449              |
| 1633505_at   | AluX                    | FBgn0003636  | -1.373886984             | 0.01774974               |
| 1632299_at   | alphaPS4                | FBgn0034005  | -2.541346923             | 0.047569561              |
| 1626349_at   | alpha-Spec              | FBgn0003470  | -1.533354915             | 0.01869392               |
| 1630636_s_at | Amun                    | FBgn0030328  | -1.310416111             | 0.038270097              |
| 1639374_s_at | Amy-d /// Amy-p         | FBgn0007979  | 2.499343046              | 0.051725715              |
| 1636623_at   | Ance-5                  | FBgn0035076  | 1.642987685              | 0.007335598              |
| 1634831_at   | antdn                   | FBgn0026268  | -4.134802251             | 0.005226484              |
| 1624759_s_at | Anip                    | FBgn0000095  | 1.751419889              | 0.00460594               |
| 1640208_s_at | Anip                    | FBgn0000095  | 1.806200877              | 0.002578861              |
| 1629476_s_at | Aplp1                   | FBgn0004021  | -2.096374192             | 0.006293595              |
| 1639180_at   | Arc1                    | FBgn0033926  | -1.699336624             | 0.019655791              |
| 1639694_s_at | Arc1 /// CG10102        | FBgn0033927  | -2.785423448             | 0.029080645              |
| 1632639_at   | Arc2                    | FBgn0033928  | -1.843814264             | 0.046640866              |
| 1625600_a_at | Asph                    | FBgn0034075  | -1.702456022             | 0.009885622              |
| 1634436_at   | Ast-C                   | FBgn0032336  | 2.707638245              | 0.014189083              |
| 1627886_at   | Atg1                    | FBgn0010715  | -1.861520711             | 0.020915864              |
| 1641621_at   | Atg5                    | FBgn0029943  | 1.411988495              | 0.047488954              |
| 1636499_at   | Atgl                    | FBgn0030708  | 1.574675984              | 0.006496351              |
| 1625719_at   | Atpalpha                | FBgn0002921  | -1.366024476             | 0.040691213              |
| 1640736_at   | b                       | FBgn0000153  | -2.806590019             | 0.04117407               |
| 1623466_at   | bab1                    | FBgn0048070  | 1.920805802              | 0.001451572              |
| 1638565_at   | baq                     | FBgn0010758  | -1.846130486             | 0.033901989              |
| 1637926_s_at | Bet1                    | FBgn0036855  | 1.263074731              | 0.026624685              |
| 1636026_at   | beta-Spec               | FBgn00250788 | -1.347641412             | 0.004706446              |
| 1636530_s_at | betaTub5D               | FBgn0038387  | -1.350768807             | 0.024982901              |
| 1623895_at   | betaTub97EF             | FBgn0019901  | -1.347510992             | 0.038054012              |
| 1640139_at   | B-H2                    | FBgn0004854  | -1.239152144             | 0.051860328              |
| 1632734_s_at | brb                     | FBgn0001090  | -2.567008963             | 0.008987865              |
| 1628099_at   | bor                     | FBgn0040237  | -1.401386594             | 0.029668728              |
| 1636990_at   | botv                    | FBgn0027305  | 2.192778365              | 0.004985608              |
| 1632943_a_at | brn-3                   | FBgn0036379  | -1.469419848             | 0.003913484              |
| 1626397_at   | bt                      | FBgn0005666  | -1.419990883             | 0.039289238              |
| 1633396_at   | btd                     | FBgn0000233  | 1.352157618              | 0.006050027              |
| 1630486_at   | Btb2                    | FBgn0025679  | 1.822000473              | 0.007813223              |
| 1631003_at   | ban                     | FBgn00259176 | -1.272004201             | 0.010585092              |
| 1624699_s_at | Bx                      | FBgn0000242  | 2.059686836              | 0.013218199              |
| 1635664_at   | Bzd                     | FBgn0011566  | -1.206395251             | 0.035533798              |
| 1627616_at   | c1.1                    | FBgn0009235  | 1.580237189              | 0.007768486              |
| 1630042_at   | Ca-alpha1T              | FBgn0029846  | -1.929286221             | 0.005113622              |
| 1641575_s_at | CadB7A                  | FBgn0037963  | -2.375668165             | 0.00231026               |
| 1623418_at   | Cad96Ca                 | FBgn0022800  | -1.346404279             | 0.006538895              |
| 1628985_a_at | Caki                    | FBgn0013759  | -1.292396128             | 0.02671751               |
| 1629313_s_at | CanK-14F                | FBgn0000758  | 1.574674344              | 0.004963619              |
| 1632170_a_at | Cap-H2                  | FBgn0037831  | 1.449868108              | 0.045197658              |
| 1637398_a_at | capu                    | FBgn0000256  | -1.876715555             | 0.05162848               |
| 1641344_a_at | cas                     | FBgn0004878  | 5.589851667              | 0.014684104              |
| 1638200_s_at | cav                     | FBgn0026257  | 1.542652733              | 0.00354416               |
| 1625135_at   | Cby                     | FBgn0067317  | -1.585813743             | 0.038111756              |
| 1637339_at   | Ccap                    | FBgn0039007  | -1.861673403             | 0.024452303              |
| 1637165_at   | Cchl                    | FBgn0038925  | -1.403460377             | 0.010770091              |
| 1634782_s_at | Ctggamma                | FBgn00501919 | -1.301610961             | 0.005216884              |
| 1627835_a_at | Cda5                    | FBgn0051973  | -2.363778741             | 0.011501488              |
| 1629473_at   | cdi                     | FBgn0004876  | -1.360619182             | 0.023821408              |
| 1639347_s_at | Cdk4                    | FBgn0016131  | 1.520207508              | 0.049653642              |
| 1625581_at   | CG10011                 | FBgn0003636  | -1.234303626             | 0.022912968              |
| 1624547_at   | CG10031                 | FBgn0031563  | 1.251622935              | 0.003503573              |
| 1635439_at   | CG10063                 | FBgn0035727  | 1.236355243              | 0.01911239               |
| 1624417_a_at | CG10186                 | FBgn0032797  | -1.226026362             | 0.040177479              |
| 1628087_s_at | CG10200                 | FBgn0033968  | -1.706496644             | 0.048710554              |
| 1630840_at   | CG10205                 | FBgn0033970  | -1.26179861              | 0.028863068              |
| 1640857_at   | CG10208                 | FBgn0039118  | 1.725781718              | 0.016322009              |
| 1641360_at   | CG10222                 | FBgn0036356  | 1.237102466              | 0.05347361               |
| 1639449_at   | CG10249                 | FBgn0027596  | -1.364184082             | 0.032391029              |
| 1633078_at   | CG10248                 | FBgn0039211  | -1.226868521             | 0.052408341              |
| 1636387_at   | CG10300                 | FBgn0039107  | -1.640169597             | 0.003557517              |
| 1638778_at   | CG10352                 | FBgn0030348  | 1.834900288              | 0.052396149              |
| 1630814_s_at | CG10353                 | FBgn0030349  | -1.222024605             | 0.02312338               |
| 1629851_at   | CG10359                 | FBgn0050952  | 1.493290652              | 0.047330416              |
| 1639095_at   | CG10426                 | FBgn0036273  | -2.824502283             | 0.04366323               |
| 1623107_at   | CG10459                 | FBgn0033440  | 2.058000501              | 0.022556513              |
| 1629726_at   | CG10472                 | FBgn0035670  | 1.588026514              | 0.037043468              |
| 1638288_at   | CG10559                 | FBgn0030923  | 1.899130735              | 0.051957246              |
| 1636268_at   | CG10570 /// CG42502     | FBgn0062228  | -1.320863759             | 0.005369837              |
| 1626086_at   | CG10621                 | FBgn0032726  | 3.235312344              | 0.03391622               |
| 1624775_at   | CG10628                 | FBgn0032818  | -1.28929948              | 0.049398413              |
| 1626406_at   | CG10630                 | FBgn0051608  | 2.192616343              | 0.052121359              |
| 1626801_at   | CG10638                 | FBgn0036290  | -1.457083276             | 0.011292064              |
| 1640492_at   | CG10672                 | FBgn0035588  | -1.248098388             | 0.050793124              |
| 1637638_s_at | CG10702                 | FBgn0032752  | -1.234578295             | 0.037678622              |
| 1631999_at   | CG10710                 | FBgn0036177  | -2.455018177             | 0.005166517              |
| 162677_s_at  | CG10743                 | FBgn0036376  | -1.345982824             | 0.04311286               |
| 1637367_at   | CG10799                 | FBgn0033821  | 1.30274074               | 0.009763974              |
| 1631523_at   | CG10824                 | FBgn0038865  | 1.747779679              | 0.04612704               |
| 1628365_at   | CG10877                 | FBgn0038804  | -1.301901229             | 0.021018894              |
| 1638302_a_at | CG10900                 | FBgn0037338  | 1.95999718               | 0.02531771               |
| 1636182_a_at | CG10948                 | FBgn0036317  | -1.235390093             | 0.039838751              |
| 1622908_a_at | CG10962                 | FBgn0030073  | 1.413120252              | 0.021659486              |
| 1639009_at   | CG10962                 | FBgn0030073  | 1.742497597              | 0.002824921              |
| 1641011_at   | CG10970                 | FBgn0030078  | 1.876349182              | 0.001702316              |
| 1640020_at   | CG10990                 | FBgn0030520  | 1.356394337              | 0.01576025               |
| 1623146_at   | CG10991                 | FBgn0037389  | 1.775257359              | 0.008615817              |
| 1636409_at   | CG11034                 | FBgn0031741  | 4.239909095              | 0.015469341              |
| 1624812_at   | CG11070                 | FBgn0028467  | -1.348962273             | 0.034311316              |
| 1636950_at   | CG11077                 | FBgn0039930  | 1.31572228               | 0.043390818              |
| 1631392_at   | CG11089                 | FBgn0039241  | 2.155555935              | 0.042966297              |
| 1634667_at   | CG11099                 | FBgn0034485  | -2.027162394             | 0.045300821              |
| 1626167_at   | CG11125                 | FBgn0039174  | 2.042210624              | 0.041295774              |
| 1641164_s_at | CG11163                 | FBgn0025693  | 1.297890196              | 0.04105531               |
| 1626013_at   | CG11192                 | FBgn0034507  | 1.683275904              | 0.012100306              |
| 1635200_at   | CG11261                 | FBgn0036332  | -1.513614273             | 0.001816473              |
| 1628734_at   | CG11286                 | FBgn0051523  | 1.564151233              | 0.009438277              |
| 1634165_at   | CG11378                 | FBgn0040364  | 1.281472224              | 0.004531626              |
| 1634197_at   | CG11576                 | FBgn0039882  | -1.522789647             | 0.004188709              |
| 1630221_at   | CG11600                 | FBgn0038068  | 1.490280508              | 0.015443009              |
| 1626654_a_at | CG11791                 | FBgn0032946  | -1.480281615             | 0.011563146              |
| 1637229_a_at | CG11796 /// DsecCG11796 | FBgn0036392  | 1.707150204              | 0.037192882              |
| 1625828_at   | CG11841                 | FBgn0039628  | 1.295970908              | 0.049250479              |
| 1631515_at   | CG11877                 | FBgn0039636  | 1.330599749              | 0.026978917              |
| 1626082_at   | CG11882                 | FBgn0039642  | 1.242507879              | 0.018087927              |
| 1627411_s_at | CG12038                 | FBgn0035179  | -1.210117105             | 0.010763773              |
| 1637162_at   | CG12054                 | FBgn0039831  | -1.402586746             | 0.024072402              |
| 1626199_at   | CG12104                 | FBgn0035238  | 1.533158303              | 0.025842108              |
| 1639971_at   | CG12224                 | FBgn0037974  | 3.37187879               | 0.008526943              |
| 1629551_s_at | CG12248                 | FBgn0039131  | -1.752470307             | 0.000926248              |
| 1629035_at   | CG12290                 | FBgn0059419  | -2.806058322             | 0.002579083              |
| 1641657_s_at | CG12424                 | FBgn0033987  | 1.326319484              | 0.004789411              |
| 1633366_at   | CG12455                 | FBgn0028859  | -1.47783086              | 0.041702126              |
| 1630845_at   | CG12520                 | FBgn0036324  | -2.193380391             | 0.015881391              |
| 1626856_at   | CG12560                 | FBgn0031974  | 1.30454496               | 0.018623944              |
| 1628308_at   | CG12714                 | FBgn0040862  | 1.318302696              | 0.014843974              |
| 1627891_at   | CG12725                 | FBgn0030483  | -4.03502513              | 0.051657315              |
| 1627826_s_at | CG12744                 | FBgn0043591  | -1.549434591             | 0.040782336              |
| 1635030_at   | CG12868                 | FBgn0033945  | 1.303976499              | 0.037172777              |
| 1632971_at   | CG12895                 | FBgn0033523  | -1.210347794             | 0.024072068              |
| 1625755_at   | CG1291                  | FBgn0035401  | 1.207586611              | 0.004826889              |
| 1638980_at   | CG12914                 | FBgn0033499  | -1.238146191             | 0.043578575              |

|              |                                       |                            |              |             |
|--------------|---------------------------------------|----------------------------|--------------|-------------|
| 1623016_at   | CG1299                                | FBgn0035501                | -1.444077663 | 0.03474457  |
| 1640741_at   | CG13001                               | FBgn0030806                | 1.543016333  | 0.040095101 |
| 1630570_at   | CG13003                               | FBgn0030826                | 2.620358626  | 0.025897236 |
| 1634939_at   | CG13077                               | FBgn0032810                | 1.394141181  | 0.020912086 |
| 1630979_at   | CG13144                               | FBgn0032260                | -1.478000047 | 0.017034884 |
| 1639474_at   | CG13159                               | FBgn0033721                | 1.618794666  | 0.046292277 |
| 1632953_at   | CG13250                               | FBgn0037013                | 1.314235059  | 0.03663267  |
| 1628716_at   | CG13283                               | FBgn0032613                | 1.875716421  | 0.049714235 |
| 1637490_at   | CG13314                               | FBgn0035949                | 1.263086404  | 0.03893186  |
| 1641711_at   | CG13360                               | FBgn0025620                | 1.259001386  | 0.003201386 |
| 1627271_at   | CG13422 /// CG7655                    | FBgn0034511                | 2.448831204  | 0.013886205 |
| 1628533_at   | CG13578                               | FBgn0035000                | 1.257494422  | 0.027292371 |
| 1640500_at   | CG13678                               | FBgn0035859                | 1.790387249  | 0.003987707 |
| 1623728_at   | CG13689                               | FBgn0031270                | 1.238503833  | 0.036038485 |
| 1629751_at   | CG13693                               | FBgn0031235                | 1.389512038  | 0.009632197 |
| 1636910_at   | CG13704                               | FBgn0035583                | 3.199925256  | 0.045662558 |
| 1630504_at   | CG13830                               | FBgn0039054                | -1.618319729 | 0.016959322 |
| 1637462_at   | CG13833                               | FBgn0039040                | -2.049769473 | 0.005298282 |
| 1626256_at   | CG13836                               | FBgn0039060                | -1.261921062 | 0.015258165 |
| 1634201_at   | CG13841 /// CG4000                    | FBgn0005088                | -1.962766201 | 0.04899427  |
| 1633887_at   | CG13857 /// DmaucG13857               | FBgn0038958                | -2.48351745  | 0.050828232 |
| 1635194_at   | CG13869                               | FBgn0034486                | -2.09517149  | 0.02766043  |
| 1638975_at   | CG13876                               | FBgn0035109                | 1.371961503  | 0.032883123 |
| 1629406_at   | CG13890                               | FBgn0035149                | 1.265449557  | 0.03798392  |
| 1636193_at   | CG13893                               | FBgn0035146                | -1.425724273 | 0.041435622 |
| 1633656_at   | CG13894                               | FBgn0035157                | -1.673420484 | 0.038074862 |
| 1635239_at   | CG13901                               | FBgn0035164                | -1.975496945 | 0.046857625 |
| 1627984_at   | CG13917                               | FBgn0035137                | -1.406318464 | 0.050361792 |
| 1629505_at   | CG13924                               | FBgn0035243                | -1.212357346 | 0.042128639 |
| 1640768_at   | CG13965                               | FBgn0032834                | 1.852919237  | 0.04404865  |
| 1626853_a_at | CG14017                               | FBgn0031721                | -2.394799709 | 0.00380591  |
| 1634301_at   | CG14017                               | FBgn0031721                | -1.468505158 | 0.023940854 |
| 1623764_at   | CG14054                               | FBgn0035282                | -1.217443652 | 0.042129658 |
| 1629536_at   | CG14079                               | FBgn0036849                | 4.094592841  | 0.03478933  |
| 1629553_at   | CG14153                               | FBgn0036094                | -6.9848784   | 0.026499899 |
| 1638800_s_at | CG14154                               | FBgn0036093                | -1.295782279 | 0.049686418 |
| 1625171_at   | CG14182                               | FBgn0036922                | 1.263134528  | 0.049187764 |
| 1625563_s_at | CG14253                               | FBgn0039467                | 1.402985404  | 0.042620245 |
| 1629727_at   | CG14258                               | FBgn0039482                | -3.538889381 | 0.040709032 |
| 1625604_s_at | CG14259                               | FBgn0039483                | -1.831786886 | 0.051594551 |
| 1639733_s_at | CG14275                               | FBgn0035022                | -1.23891747  | 0.045682558 |
| 1629810_at   | CG14340                               | FBgn0031302                | -1.920146872 | 0.036274259 |
| 1634960_at   | CG14375                               | FBgn0038147                | 1.382917411  | 0.022421197 |
| 1633481_at   | CG14394                               | FBgn0038079                | -2.46517204  | 0.013425003 |
| 1628948_s_at | CG14408                               | FBgn0039591                | -1.23751985  | 0.028330559 |
| 1624168_at   | CG14411                               | FBgn0035082                | -1.264324391 | 0.036482038 |
| 1629346_at   | CG1443                                | FBgn0039620                | 3.155951425  | 0.027334587 |
| 1627293_at   | CG14439                               | FBgn0029898                | 2.047777727  | 0.042867909 |
| 1640762_at   | CG14464                               | FBgn0030000                | 1.271859503  | 0.036333003 |
| 1637894_at   | CG14509                               | FBgn0039647                | -2.036704483 | 0.023782051 |
| 1634302_s_at | CG14516                               | FBgn0039640                | -1.324310728 | 0.024899342 |
| 1641454_at   | CG1461                                | FBgn0030558                | 2.282516042  | 0.001968951 |
| 1632923_at   | CG14661                               | FBgn0037408                | -2.215820426 | 0.004681236 |
| 1636119_at   | CG1468                                | FBgn0030157                | 1.236360956  | 0.052584467 |
| 1623916_at   | CG14694                               | FBgn0037845                | -1.569305973 | 0.012029944 |
| 1635764_at   | CG14696 /// DanaCG16171 / FBgn0037853 | 1.996135976                | 1.996135976  | 0.011865554 |
| 1632487_at   | CG14721                               | FBgn0037942                | -1.332071633 | 0.024158122 |
| 1632160_s_at | CG14736                               | FBgn0037986                | 1.825715665  | 0.042229541 |
| 1636357_at   | CG14834                               | FBgn0035768                | -1.31231131  | 0.05113515  |
| 1635898_at   | CG14856                               | FBgn0038261                | 1.529510488  | 0.026980969 |
| 1634038_s_at | CG14856                               | FBgn0038261                | 1.641170355  | 0.003412293 |
| 1641358_s_at | CG14869                               | FBgn0038341                | -1.207190054 | 0.028158283 |
| 1640720_s_at | CG14872                               | FBgn0038346                | 1.549309097  | 0.047951761 |
| 1623900_a_at | CG14935 /// DsecCG14935               | FBgn0032382                | 1.725931252  | 0.054960017 |
| 1633980_at   | CG14969                               | FBgn0035440                | 1.286155429  | 0.024558655 |
| 1636338_at   | CG15021                               | FBgn0035544                | -2.018366527 | 0.010364253 |
| 1634956_at   | CG15022                               | FBgn0035547                | 1.30025988   | 0.049756566 |
| 1634952_s_at | CG15094                               | FBgn0034392                | -1.271597131 | 0.014378861 |
| 1640629_s_at | CG1516                                | FBgn0027580                | 1.794590899  | 0.007418041 |
| 1637520_at   | CG1518                                | FBgn0031449                | 1.394838254  | 0.003110077 |
| 1624363_at   | CG15201                               | FBgn0030272                | 1.569637775  | 0.000957103 |
| 1632772_at   | CG15203                               | FBgn0030261                | 1.198347784  | 0.037494523 |
| 1635688_at   | CG15210                               | FBgn0040850                | -1.478051631 | 0.000898937 |
| 1631522_s_at | CG15213                               | FBgn0040843                | -1.26464989  | 0.011137178 |
| 1627724_at   | CG15226                               | FBgn0034550                | 1.327156342  | 0.015368711 |
| 1635162_at   | CG15314                               | FBgn0030172                | -1.217151146 | 0.045991679 |
| 1628942_at   | CG15385                               | FBgn0031397                | 1.360268705  | 0.004337012 |
| 1635897_at   | CG15399                               | FBgn0035399                | 1.552038638  | 0.013042343 |
| 164213_s_at  | CG15535                               | FBgn0039764                | -1.274404559 | 0.053002223 |
| 1630765_at   | CG15547                               | FBgn0039809                | -1.395789773 | 0.046826399 |
| 1631753_at   | CG15550                               | FBgn0039811                | -1.331743894 | 0.048399232 |
| 1628810_at   | CG15597                               | FBgn0037420                | 1.672577816  | 0.017231913 |
| 1632496_at   | CG15629                               | FBgn0036290                | 4.921270256  | 0.002132588 |
| 1632097_at   | CG15646                               | FBgn0030665                | 1.347479508  | 0.00470109  |
| 1625873_at   | CG15661                               | FBgn0034605                | 2.196885988  | 0.038088848 |
| 1637796_at   | CG15717                               | FBgn0030451                | 1.499796401  | 0.015518843 |
| 1640950_at   | CG15739                               | FBgn0030347                | 1.387915652  | 0.056297655 |
| 1641479_at   | CG15870                               | FBgn0036909                | 1.599424989  | 0.004282016 |
| 1640430_s_at | CG15881                               | FBgn0036909                | -1.195797694 | 0.045627964 |
| 1626581_s_at | CG1607                                | FBgn0039844                | 1.517104013  | 0.005596481 |
| 1640952_at   | CG1632                                | FBgn0036527                | 1.466276161  | 0.013671409 |
| 1624617_at   | CG1665                                | FBgn0033451                | 1.687807068  | 0.017526383 |
| 1635517_at   | CG1667                                | FBgn0033453                | 1.872094593  | 0.000605968 |
| 1629083_at   | CG16704                               | FBgn0031558                | 2.492254963  | 0.037467325 |
| 1628474_at   | CG16712                               | FBgn0031561                | 1.232744087  | 0.022481813 |
| 1640734_a_at | CG16718                               | FBgn0038721                | -1.459178792 | 0.026252036 |
| 1630088_at   | CG16743                               | FBgn0032322                | 2.675116398  | 0.006289022 |
| 1631691_at   | CG16772 /// DmaucG16772               | FBgn0032835                | 1.879872739  | 0.00298311  |
| 1624256_at   | CG16857                               | FBgn0029802                | -1.467467277 | 0.002734995 |
| 1637911_at   | CG16892                               | FBgn0030122                | 1.369668411  | 0.017907883 |
| 1626184_at   | CG16978                               | FBgn0040972                | -2.160859095 | 0.006058461 |
| 1629685_at   | CG16986                               | FBgn0035356                | 1.237364029  | 0.022774552 |
| 1640669_at   | CG17163                               | FBgn0039942                | 1.314798455  | 0.023256444 |
| 1628173_at   | CG17189                               | FBgn0039485                | -1.607880291 | 0.007391829 |
| 1623690_at   | CG17190                               | FBgn0038761                | 2.670290437  | 0.029691806 |
| 1634933_s_at | CG17207                               | FBgn0038051                | 1.417800948  | 0.039021747 |
| 1640103_s_at | CG17224                               | FBgn0031489                | 1.578491691  | 0.040072251 |
| 1629791_at   | CG17271                               | FBgn0038629                | 1.422234537  | 0.052658925 |
| 1627166_at   | CG17287                               | FBgn0034202                | 1.492469725  | 0.009441898 |
| 1630299_at   | CG17325 /// CG42305                   | FBgn00259201 / FBgn0040993 | -4.005905348 | 0.002751227 |
| 1634988_s_at | CG17352                               | FBgn0035880                | 2.505774634  | 0.042373863 |
| 1636610_at   | CG17359                               | FBgn0036396                | 1.305126819  | 0.041481344 |
| 1636833_at   | CG17364                               | FBgn0036391                | 1.374815796  | 0.012072872 |
| 1625320_at   | CG1738                                | FBgn0030291                | 1.229391998  | 0.04306195  |
| 1628918_at   | CG17478                               | FBgn0032998                | 3.169228468  | 0.00026028  |
| 1630811_s_at | CG17528                               | FBgn0032999                | 1.281658347  | 0.039384252 |
| 1638171_s_at | CG1753                                | FBgn0031148                | 1.550050265  | 0.042115746 |
| 1630752_at   | CG17618 /// CG6982                    | FBgn0040587 / FBgn0039014  | 1.222271684  | 0.021673147 |
| 1628925_at   | CG17625                               | FBgn0039002                | 1.229499942  | 0.006123812 |
| 1622948_at   | CG17721                               | FBgn0037885                | 1.43646549   | 0.003167919 |
| 1625910_at   | CG1773                                | FBgn0033439                | 1.877116685  | 0.018190511 |
| 1624488_a_at | CG17734                               | FBgn0037890                | -1.368806327 | 0.009990764 |
| 1628712_at   | CG17754                               | FBgn0030114                | 1.204831727  | 0.028689794 |
| 1629511_at   | CG17778                               | FBgn0031224                | -2.155869723 | 0.006381434 |
| 1638573_a_at | CG17780                               | FBgn0039197                | 1.311027885  | 0.037558406 |
| 1625262_at   | CG17786                               | FBgn0039167                | 1.622662917  | 0.037020321 |
| 1634728_at   | CG17821                               | FBgn0034383                | -5.147388255 | 0.039787737 |
| 1640144_at   | CG17867                               | FBgn0035132                | 1.695410938  | 0.02328607  |
| 1640796_a_at | CG1812                                | FBgn0031119                | -1.333364451 | 0.004883384 |
| 1630422_at   | CG18231                               | FBgn0036796                | 1.335524708  | 0.004396477 |
| 1632141_at   | CG18265                               | FBgn0036725                | 3.863964037  | 0.021570574 |
| 1631549_s_at | CG18278 /// CG30059                   | FBgn0050659 / FBgn0033836  | 1.352354454  | 0.023145491 |
| 1639778_at   | CG18304                               | FBgn0031869                | -1.737410105 | 0.035405803 |
| 1627460_at   | CG18343                               | FBgn0033683                | 2.658922388  | 0.003602431 |
| 1636902_at   | CG1840                                | FBgn0030351                | 1.281730841  | 0.049021885 |
| 1630590_at   | CG18417                               | FBgn0035780                | 3.922033979  | 0.058080826 |
| 1624619_s_at | CG18477 /// CG31780                   | FBgn0051569 / FBgn0051780  | 3.883886997  | 0.004958695 |
| 1625345_at   | CG18508                               | FBgn0028746                | -1.395231967 | 0.004059616 |
| 1638441_a_at | CG18519                               | FBgn0038348                | -1.342747777 | 0.028270015 |
| 1634979_at   | CG18600                               | FBgn0038601                | 1.471120669  | 0.048131028 |
| 1629030_a_at | CG18659                               | FBgn0039324                | -1.482324841 | 0.032311997 |
| 1623883_at   | CG18661                               | FBgn0040964                | 1.731743189  | 0.00944741  |
| 1635361_at   | CG18806                               | FBgn0042129                | 1.765414151  | 0.031245842 |
| 1641240_a_at | CG1889                                | FBgn0030164                | -1.322404311 | 0.022078273 |
| 1626181_at   | CG1969                                | FBgn0039690                | 1.437654162  | 0.012306219 |
| 1637778_a_at | CG1969                                | FBgn0039690                | 1.558498392  | 0.016820909 |
| 1640714_at   | CG1979                                | FBgn0026563                | 2.035283831  | 0.035721262 |
| 1627499_at   | CG2016 /// DmaucG2016 ///             | FBgn0050839 / FBgn0037289  | -1.76930365  | 0.040202585 |
| 1636676_at   | CG2150                                | FBgn0030065                | 1.845548946  | 0.027389472 |

|                |                            |                                       |              |             |
|----------------|----------------------------|---------------------------------------|--------------|-------------|
| 1629106_at     | CG2233                     | FBgn020990                            | 1.233138632  | 0.011024309 |
| 1629104_at     | CG2258                     | FBgn020997                            | -1.307213692 | 0.037390752 |
| 1629493_s_at   | CG2371                     | FBgn003534                            | 1.299241842  | 0.019654988 |
| 1629933_s_at   | CG2469                     | FBgn0035205                           | -1.897445349 | 0.016041048 |
| 1629014_s_at   | CG2604                     | FBgn0037298                           | 1.26764285   | 0.0123629   |
| 1638856_at     | CG2650                     | FBgn0000092                           | -1.460944798 | 0.046732837 |
| 1627592_at     | CG2678                     | FBgn0014931                           | 2.069422662  | 0.001743376 |
| 1634016_at     | CG2781                     | FBgn0035334                           | -1.547598942 | 0.002727336 |
| 1639768_at     | CG2813                     | FBgn0031268                           | 1.255000843  | 0.05351569  |
| 1623552_s_at   | CG2893                     | FBgn040030                            | 1.678283764  | 0.046176628 |
| 1628194_at     | CG2918                     | FBgn0023529                           | 1.220554859  | 0.018284388 |
| 1627271_s_at   | CG2930                     | FBgn0028491                           | 1.371558515  | 0.01394365  |
| 1640891_at     | CG3003                     | FBgn0030144                           | 2.185247468  | 0.001432002 |
| 1628232_at     | CG30046                    | FBgn0050046                           | 1.248091179  | 0.003788282 |
| 1628387_s_at   | CG30080                    | FBgn0050080                           | 2.78821794   | 0.002192422 |
| 1627757_at     | CG30080                    | FBgn0050080                           | 3.659631306  | 0.006766328 |
| 1636154_at     | CG30090                    | FBgn0050090                           | 3.356520995  | 0.051491326 |
| 1627820_at     | CG30096                    | FBgn0050096                           | 1.238884478  | 0.006669507 |
| 1637120_at     | CG30098                    | FBgn0050098                           | 3.09382873   | 0.04662493  |
| 1631764_s_at   | CG30115                    | FBgn0050115                           | -1.801451736 | 0.053855575 |
| 1639615_s_at   | CG30116                    | FBgn0028496                           | -1.461032564 | 0.000242348 |
| 1641326_at     | CG30118                    | FBgn0050118                           | -1.366390642 | 0.010754153 |
| 1638124_at     | CG30121                    | FBgn0050121                           | -8.349790499 | 0.02347797  |
| 1634789_at     | CG30151                    | FBgn0050151                           | 2.885746027  | 0.004501138 |
| 1629525_at     | CG30152 /// DafsCG30152    | FBgn0034543                           | -1.282388447 | 0.0283105   |
| 1640357_at     | CG30161                    | FBgn0050161                           | -1.349110327 | 0.015583639 |
| 1630613_at     | CG30279                    | FBgn0050279                           | -1.789640735 | 0.033912103 |
| 1634192_at     | CG30281                    | FBgn0050281                           | -1.647433046 | 0.022403967 |
| 1631135_at     | CG30286                    | FBgn0050286                           | 2.051709772  | 0.020371859 |
| 1635548_s_at   | CG30287 /// CG34166        | FBgn0085195                           | 1.318685016  | 0.009810134 |
| 1636927_at     | CG30379                    | FBgn0050379                           | 1.524419534  | 0.03026454  |
| 1635524_at     | CG30427                    | FBgn0043792                           | -2.577766642 | 0.005854466 |
| 1630985_at     | CG30441                    | FBgn0050441                           | 1.525522348  | 0.007329917 |
| 1629302_at     | CG30447                    | FBgn0050447                           | 1.550818661  | 0.027775615 |
| 1623508_at     | CG30466                    | FBgn0050466                           | 1.491227117  | 0.002968786 |
| 1635845_at     | CG30480                    | FBgn0050480                           | 1.320064118  | 0.010570556 |
| 1631455_at     | CG30493 /// (Z)08492       | FBgn0034934                           | -1.307473464 | 0.03091288  |
| 1638049_at     | CG30494                    | FBgn0027604                           | 1.349635662  | 0.001410018 |
| 1636217_at     | CG30503 /// kappaB-Ras     | FBgn0050503/ FBgn0040513              | 1.744161139  | 0.040676993 |
| 1630123_at     | CG30999                    | FBgn0030145                           | 2.629714735  | 0.02381881  |
| 1633971_at     | CG31036                    | FBgn0051036                           | -1.701357908 | 0.018799798 |
| 1624900_at     | CG31051                    | FBgn0051051                           | 1.909683208  | 0.016156307 |
| 1629742_at     | CG31058                    | FBgn0051058                           | -1.21869744  | 0.005448388 |
| 1630343_a_at   | CG31064                    | FBgn0051064                           | -1.622188719 | 0.006981738 |
| 1638593_at     | CG31103                    | FBgn0051103                           | -1.643010103 | 0.006137323 |
| 1629786_a_at   | CG31116                    | FBgn0051116                           | -1.33292752  | 0.005131736 |
| 1634447_at     | CG31140                    | FBgn0051140                           | -1.597091165 | 0.027246247 |
| 1632257_at     | CG31183                    | FBgn0051183                           | -1.326457391 | 0.031358372 |
| 1640666_at     | CG31205                    | FBgn0051205                           | -2.76827365  | 0.049994738 |
| 1627572_at     | CG31219                    | FBgn0051219                           | -2.915025155 | 0.038785517 |
| 1640854_at     | CG31248 /// DsimGD119913   | FBgn0051248                           | 2.472222057  | 0.053714319 |
| 1624002_s_at   | CG31291                    | FBgn0051291                           | -1.663317131 | 0.032227192 |
| 1626320_at     | CG31344                    | FBgn0051344                           | -1.422450384 | 0.004615067 |
| 1630988_at     | CG31347                    | FBgn0051347                           | -1.201096167 | 0.04668497  |
| 1623419_s_at   | CG31358 /// CG42504 /// CC | FBgn0051358/ FBgn0260230/ FBgn0260231 | -1.19937607  | 0.025319902 |
| 1633991_at     | CG31445                    | FBgn0051445                           | 1.287432386  | 0.012549513 |
| 1626476_at     | CG31457                    | FBgn0051457                           | 1.289487987  | 0.007808979 |
| 1627341_at     | CG31556                    | FBgn0051556                           | 1.531641009  | 0.005454092 |
| 1638230_at     | CG3160                     | FBgn0029789                           | 1.532405738  | 0.029007549 |
| 1625506_3_a_at | CG31606                    | FBgn0051606                           | 2.684986808  | 0.050352569 |
| 1623765_at     | CG31606                    | FBgn0051606                           | 3.055420331  | 0.017464659 |
| 1628934_at     | CG3162                     | FBgn0034834                           | -1.04034852  | 0.04731272  |
| 1624460_s_at   | CG31624 /// CG31988 /// Ds | FBgn0051624/ FBgn0051988              | -1.921409466 | 0.037872568 |
| 1638139_at     | CG31664                    | FBgn0051664                           | 7.176771561  | 0.033630643 |
| 1630255_at     | CG31676                    | FBgn0051676                           | 1.337507208  | 0.024931537 |
| 1625339_at     | CG31677                    | FBgn0051677                           | 2.36829971   | 0.014297969 |
| 1629877_at     | CG31683                    | FBgn0051683                           | 1.437755477  | 0.024717413 |
| 1633252_at     | CG31714                    | FBgn0032180                           | -1.3814452   | 0.047904838 |
| 1636482_at     | CG31778                    | FBgn0051778                           | -1.737219437 | 0.015025687 |
| 1631763_s_at   | CG31793                    | FBgn0051793                           | -1.263194608 | 0.033836186 |
| 1630746_at     | CG31807                    | FBgn0051807                           | 1.311626238  | 0.029947802 |
| 1630244_s_at   | CG31809 /// CG31810        | FBgn0051809/ FBgn0051810              | -1.640961814 | 0.039613422 |
| 1629542_at     | CG31821                    | FBgn0051821                           | -2.237206355 | 0.031529722 |
| 1640374_at     | CG31823                    | FBgn0051823                           | -2.390492252 | 0.007152197 |
| 1629986_at     | CG31826 /// Ku80           | FBgn0051826                           | 3.050209495  | 0.036430002 |
| 1638924_at     | CG31845                    | FBgn0051845                           | 1.664149448  | 0.010471911 |
| 1623743_at     | CG31911                    | FBgn0023525                           | 2.159808758  | 0.002718498 |
| 1638752_s_at   | CG31961                    | FBgn0031961                           | -1.329298162 | 0.02863038  |
| 1625972_at     | CG31999                    | FBgn0051999                           | -1.246231136 | 0.054695058 |
| 1634093_at     | CG32017                    | FBgn0052017                           | 1.882354474  | 0.016310323 |
| 1630485_at     | CG32021                    | FBgn0052021                           | 3.151218955  | 0.005597416 |
| 1633520_at     | CG32027                    | FBgn0052027                           | 1.775364187  | 0.019146792 |
| 1629205_at     | CG32032                    | FBgn0049806                           | 2.655251163  | 0.024801163 |
| 1639697_at     | CG32038                    | FBgn0052038                           | -1.377644198 | 0.030232122 |
| 1635756_at     | CG32039                    | FBgn0052039                           | -1.22045576  | 0.017009473 |
| 1623963_at     | CG32115                    | FBgn0052115                           | 2.334793957  | 0.019723219 |
| 1626143_s_at   | CG32138                    | FBgn0052138                           | -1.564105819 | 0.041736891 |
| 1623740_at     | CG32154                    | FBgn0052154                           | 2.00343023   | 0.003630156 |
| 1626643_at     | CG32160                    | FBgn0052160                           | 1.429730604  | 0.004137268 |
| 1631825_at     | CG32167                    | FBgn0052167                           | 1.59629431   | 0.05287281  |
| 1638691_at     | CG32202                    | FBgn0052202                           | -1.290733957 | 0.007132444 |
| 1635041_at     | CG32225                    | FBgn0052225                           | -1.311956604 | 0.010832655 |
| 1640212_at     | CG32228                    | FBgn0052228                           | 2.531004373  | 0.042101527 |
| 1640961_at     | CG32213                    | FBgn0052213                           | -2.520112841 | 0.04057644  |
| 1639496_at     | CG32253                    | FBgn0052253                           | -1.201194688 | 0.01606165  |
| 1636566_at     | CG32368                    | FBgn0052368                           | 3.253847567  | 0.010880474 |
| 1635093_s_at   | CG32369                    | FBgn0052369                           | -2.04638132  | 0.048973397 |
| 1628225_at     | CG32391                    | FBgn0052391                           | 2.249028069  | 0.000709719 |
| 1640789_s_at   | CG32392                    | FBgn0052392                           | -1.200369095 | 0.018578227 |
| 1625323_at     | CG32397                    | FBgn0052397                           | -1.773494677 | 0.035274311 |
| 1637155_at     | CG32407                    | FBgn0052407                           | 2.109262035  | 0.017571757 |
| 1629841_at     | CG32418 /// Myt1           | FBgn0052418                           | -1.547622025 | 0.022567275 |
| 1638365_at     | CG3244                     | FBgn005244                            | -2.541352795 | 0.017917499 |
| 1635285_at     | CG32461                    | FBgn0052461                           | 1.325201431  | 0.022078934 |
| 1628500_at     | CG32483                    | FBgn0052483                           | 25.62781069  | 0.00146096  |
| 1640125_s_at   | CG32541 /// CG42506        | FBgn0052541/ FBgn0260232              | -2.362435597 | 0.002290434 |
| 1639911_s_at   | CG32541 /// CG42506        | FBgn0052541/ FBgn0260232              | -1.887784423 | 0.043225156 |
| 1634320_at     | CG32579                    | FBgn0052579                           | 1.299112062  | 0.054008117 |
| 1630797_at     | CG32582                    | FBgn0052582                           | 1.516199926  | 0.03678967  |
| 1637313_at     | CG32595                    | FBgn0052595                           | -1.556166758 | 0.051933889 |
| 1636030_s_at   | CG32626                    | FBgn0052626                           | 1.498506145  | 0.021036605 |
| 1630581_at     | CG32639                    | FBgn0052639                           | 2.99896175   | 0.035217002 |
| 1630842_s_at   | CG32640 /// CG32641        | FBgn0052641/ FBgn0052640              | 1.388427328  | 0.022984706 |
| 1636772_s_at   | CG32694                    | FBgn0052694                           | 1.928396434  | 0.01138884  |
| 1641434_at     | CG32695                    | FBgn0052695                           | 3.25468593   | 0.008944958 |
| 1633824_at     | CG32710                    | FBgn0052710                           | -1.269947039 | 0.030365497 |
| 1638597_s_at   | CG32733 /// CG32797        | FBgn0052733/ FBgn0052797              | 1.371183512  | 0.054982784 |
| 1637625_s_at   | CG32813                    | FBgn0052813                           | -1.207437349 | 0.0287751   |
| 1637507_at     | CG32835                    | FBgn0052835                           | 1.609710424  | 0.046491249 |
| 1632821_a_at   | CG3287                     | FBgn0028954                           | -1.48426463  | 0.012303012 |
| 1628931_at     | CG3301                     | FBgn0038878                           | 1.467440153  | 0.012783192 |
| 1623000_at     | CG33093                    | FBgn0053093                           | 7.065010314  | 0.015303653 |
| 1634318_at     | CG33110                    | FBgn0053110                           | -1.997450844 | 0.027748871 |
| 1626718_at     | CG33127                    | FBgn0053127                           | -1.260266055 | 0.039284888 |
| 1634374_at     | CG33138 /// DsecCG33138    | FBgn0053138                           | -1.319698469 | 0.054391609 |
| 1636381_a_at   | CG33156                    | FBgn0053156                           | 1.197007064  | 0.036414189 |
| 1634514_at     | CG33258                    | FBgn0053258                           | 1.921070432  | 0.010001616 |
| 163312_s_at    | CG3326                     | FBgn005326                            | -1.624120114 | 0.028038027 |
| 1629074_at     | CG33275                    | FBgn0053275                           | -1.532481863 | 0.016026305 |
| 1629568_at     | CG33276                    | FBgn0053276                           | 1.236195284  | 0.007037303 |
| 1635178_at     | CG33299                    | FBgn0053299                           | -1.64808616  | 0.043386449 |
| 1623813_at     | CG33307                    | FBgn0053307                           | 1.565995427  | 0.046306985 |
| 1635181_at     | CG3337                     | FBgn005337                            | -1.444581354 | 0.009637774 |
| 1632584_at     | CG33344                    | FBgn0035154                           | 2.389071448  | 0.001891288 |
| 1625360_at     | CG33458                    | FBgn0053458                           | 3.945423044  | 0.049352335 |
| 1639019_s_at   | CG33470 /// IM10           | FBgn0033835/ FBgn0053470              | 1.562649369  | 0.009684898 |
| 1623345_at     | CG33474                    | FBgn0053474                           | 4.64805148   | 0.004005934 |
| 1629181_at     | CG33494                    | FBgn0053494                           | 1.281674576  | 0.011779397 |
| 1637958_at     | CG33510                    | FBgn0053510                           | 3.817809199  | 0.033459603 |
| 1638087_at     | CG33523                    | FBgn0053523                           | -2.158606089 | 0.003380954 |
| 1624053_s_at   | CG33947                    | FBgn0053947                           | -1.618512775 | 0.002745026 |
| 1632884_at     | CG33967                    | FBgn0053967                           | -1.546589153 | 0.008627452 |
| 1632551_at     | CG33969                    | FBgn0053969                           | -1.230059697 | 0.034678722 |
| 1628002_at     | CG33986                    | FBgn0053986                           | -1.197614284 | 0.036470637 |
| 1632399_at     | CG34007                    | FBgn0054007                           | -1.284071172 | 0.009746308 |
| 1624813_s_at   | CG34008                    | FBgn0054008                           | 1.315520223  | 0.047716554 |
| 1634018_at     | CG34028                    | FBgn0054028                           | 1.323402277  | 0.038205505 |
| 1639797_at     | CG34109                    | FBgn0083945                           | 1.843377653  | 0.0243953   |
| 1630404_at     | CG34112                    | FBgn0086068                           | 1.380837293  | 0.043131307 |

|              |                            |             |              |             |
|--------------|----------------------------|-------------|--------------|-------------|
| 1632072_at   | CG34134                    | FBgn0083970 | 1.277926622  | 0.025894422 |
| 1634179_at   | CG34139                    | FBgn0083975 | 1.283915369  | 0.004421608 |
| 1637285_s_at | CG34179 /// slmo           | FBgn0083976 | -1.342172404 | 0.011181941 |
| 1639112_s_at | CG34188                    | FBgn0085217 | 1.516597583  | 0.030090935 |
| 1628171_at   | CG34205                    | FBgn0085234 | -1.223790552 | 0.016538724 |
| 1634519_at   | CG34217                    | FBgn0085246 | -3.655507386 | 0.015387376 |
| 1632800_at   | CG34232                    | FBgn0085261 | -1.738548523 | 0.040286889 |
| 1628992_at   | CG34253                    | FBgn0085282 | 1.226836466  | 0.015986446 |
| 1633297_at   | CG34261                    | FBgn0085290 | 1.362034582  | 0.021595056 |
| 1636386_s_at | CG34318 /// CG1879         | FBgn0085349 | -1.37446325  | 0.00630567  |
| 1638232_s_at | CG34325                    | FBgn0085354 | 2.856331318  | 0.011068393 |
| 1637838_at   | CG34380                    | FBgn0085407 | 1.244562199  | 0.026486071 |
| 1627196_at   | CG34384                    | FBgn0085413 | 1.421896709  | 0.019801526 |
| 1633994_at   | CG34402                    | FBgn0085431 | 1.201790148  | 0.003596181 |
| 1623896_a_at | CG34404                    | FBgn0085433 | -1.316316727 | 0.039157301 |
| 163516_at    | CG34409                    | FBgn0085438 | -1.555469388 | 0.009440332 |
| 1640379_s_at | CG34424                    | FBgn0085453 | 2.100859964  | 0.038400197 |
| 1635160_at   | CG34434                    | FBgn0250904 | 2.14590816   | 0.004990285 |
| 1626896_at   | CG34437                    | FBgn0085466 | 1.391664708  | 0.036534351 |
| 1640048_s_at | CG34449                    | FBgn0085499 | -1.294853009 | 0.029497415 |
| 1626220_at   | CG3448                     | FBgn0035996 | 1.284697176  | 0.037257879 |
| 1625459_at   | CG3520                     | FBgn0034859 | -1.356055915 | 0.023812892 |
| 1624029_at   | CG3608                     | FBgn0035039 | -1.628187295 | 0.047041541 |
| 1640207_at   | CG3635                     | FBgn0032981 | -3.203410662 | 0.009205337 |
| 1636769_at   | CG3651                     | FBgn0032974 | 1.203411459  | 0.027002443 |
| 1630343_at   | CG3679                     | FBgn0027521 | 1.875423826  | 0.045321844 |
| 1638086_at   | CG3746                     | FBgn0034755 | -1.430926927 | 0.051144207 |
| 1625245_at   | CG3759                     | FBgn0032116 | -1.614372309 | 0.031527446 |
| 1627872_at   | CG3770                     | FBgn0035085 | 1.664020646  | 0.019894654 |
| 1640399_at   | CG3775                     | FBgn0030425 | 1.269501119  | 0.025040411 |
| 1626729_at   | CG3803                     | FBgn0034938 | -1.345205578 | 0.046634478 |
| 1627311_at   | CG3829                     | FBgn0035091 | 1.199306339  | 0.022469857 |
| 1628881_at   | CG3884                     | FBgn0038756 | -4.886799466 | 0.043731238 |
| 1624695_at   | CG3999 /// DsxcCG3999      | FBgn0037801 | 1.709785092  | 0.035659445 |
| 1622974_at   | CG4000                     | FBgn0038820 | -2.314263814 | 0.025814052 |
| 1634527_s_at | CG40005 /// cta            | FBgn0058005 | 1.287358024  | 0.018726929 |
| 1637651_at   | CG4004                     | FBgn0030418 | 1.89580424   | 0.064821888 |
| 1641245_a_at | CG40115                    | FBgn0058160 | 3.626182833  | 0.017252122 |
| 1636647_s_at | CG40160                    | FBgn0058191 | 1.508615339  | 0.022606098 |
| 1629023_s_at | CG40191                    | FBgn0058191 | 1.219248051  | 0.016721018 |
| 1627161_a_at | CG40485                    | FBgn0038973 | -5.052359946 | 0.051542113 |
| 1634671_a_at | CG41284 /// CG42598        | FBgn0058559 | 1.270487047  | 0.0532616   |
| 1631001_s_at | CG42257                    | FBgn0259142 | 1.47023829   | 0.031259968 |
| 1625296_at   | CG42368                    | FBgn0259174 | 1.439427374  | 0.011333937 |
| 1623741_at   | CG42368 /// sccu           | FBgn0031809 | 1.378137356  | 0.032897567 |
| 1639307_at   | CG42375 /// CG9288         | FBgn0038182 | -1.467575779 | 0.012472771 |
| 1637594_at   | CG42388                    | FBgn0259734 | 1.415588565  | 0.049323963 |
| 1623339_at   | CG42445 /// CG7498         | FBgn0040833 | 1.645747873  | 0.009040768 |
| 1634512_at   | CG42510 /// CG5226         | FBgn0034555 | -1.103204222 | 0.003649912 |
| 1634804_at   | CG42533                    | FBgn0031919 | -1.451379703 | 0.0276259   |
| 1639107_at   | CG42535                    | FBgn0052245 | 1.248427175  | 0.040405431 |
| 1628265_a_at | CG42540                    | FBgn0052245 | 1.251372814  | 0.038133017 |
| 1624967_at   | CG42593                    | FBgn0029093 | 1.520048701  | 0.045517501 |
| 1631432_at   | CG42749                    | FBgn0029749 | 1.354714022  | 0.039010261 |
| 1628123_at   | CG4332                     | FBgn0030456 | 1.37694729   | 0.023642631 |
| 1638038_at   | CG4335                     | FBgn0038795 | 2.386630129  | 0.025969222 |
| 1632975_at   | CG4398                     | FBgn0034126 | 1.309120895  | 0.002587847 |
| 1640896_at   | CG4462                     | FBgn0038756 | -2.845314266 | 0.025731266 |
| 1632710_s_at | CG4572 /// DpscGA18267     | FBgn0038738 | -1.196835605 | 0.050110771 |
| 1640002_at   | CG4586                     | FBgn0029924 | 1.300108175  | 0.006643731 |
| 1623109_at   | CG4593                     | FBgn0029929 | 1.202237284  | 0.05239426  |
| 1627151_at   | CG4612                     | FBgn0035076 | -1.235778538 | 0.011761566 |
| 1637294_at   | CG4641                     | FBgn0035967 | -1.758182707 | 0.005006689 |
| 1626738_at   | CG4644 /// mtRNApol        | FBgn0031300 | -1.737115081 | 0.024006356 |
| 1634243_a_at | CG4673                     | FBgn0039348 | -1.24703174  | 0.044697241 |
| 1633088_at   | CG4733                     | FBgn0038974 | -1.350727468 | 0.011245233 |
| 1638021_at   | CG4757                     | FBgn0027584 | 20.93737008  | 0.010228751 |
| 1631021_at   | CG4771                     | FBgn0039018 | 1.324872322  | 0.048530891 |
| 1637794_at   | CG4927                     | FBgn0034139 | 1.263392868  | 0.013216931 |
| 1633375_at   | CG5026                     | FBgn0038745 | 1.242173325  | 0.012382718 |
| 1635613_at   | CG5079                     | FBgn0039346 | -1.415844999 | 0.000874768 |
| 1629489_at   | CG5111                     | FBgn0039343 | 1.498085536  | 0.011500949 |
| 1629778_s_at | CG5130                     | FBgn0037000 | 1.212141677  | 0.050690633 |
| 1624800_at   | CG5224                     | FBgn0038858 | 2.134771516  | 0.032363966 |
| 1627884_at   | CG5281                     | FBgn0037902 | -1.487897352 | 0.046841739 |
| 1631532_at   | CG5282                     | FBgn0036986 | -1.346136772 | 0.012517147 |
| 1638344_at   | CG5287 /// (2)k10105       | FBgn0032477 | 1.283978072  | 0.022100042 |
| 1641681_s_at | CG5288 /// DsxcCG5288      | FBgn0036005 | 1.255718195  | 0.051449144 |
| 1630551_at   | CG5290                     | FBgn0036772 | -1.61719091  | 0.024131473 |
| 1631627_at   | CG5335 /// Fbp1            | FBgn0034365 | 1.313828227  | 0.007342835 |
| 1631050_at   | CG5384                     | FBgn0032216 | -1.305303237 | 0.036158489 |
| 1641334_at   | CG5446                     | FBgn0032429 | -1.257104864 | 0.037767135 |
| 1632006_at   | CG5491                     | FBgn0039459 | -1.602216466 | 0.025117838 |
| 1629201_at   | CG5550                     | FBgn0034160 | 1.210326821  | 0.046871363 |
| 1640713_at   | CG5569                     | FBgn0034919 | -1.280184429 | 0.016297938 |
| 1627245_s_at | CG5746                     | FBgn0039186 | 1.296316799  | 0.018232993 |
| 1641236_s_at | CG5758                     | FBgn0038756 | 1.655197544  | 0.02817544  |
| 1638238_at   | CG5778                     | FBgn0038930 | 1.279989926  | 0.000402678 |
| 1632201_at   | CG5783                     | FBgn0032670 | 1.308310523  | 0.009761191 |
| 1631227_at   | CG5793                     | FBgn0038858 | 1.300271897  | 0.011799112 |
| 1625250_at   | CG5802                     | FBgn0038863 | 1.230201475  | 0.011246411 |
| 1628398_at   | CG5853                     | FBgn0032167 | 1.508169243  | 0.03403614  |
| 1636489_at   | CG5987                     | FBgn0039501 | -1.198296562 | 0.007322813 |
| 1629153_s_at | CG5991                     | FBgn0026576 | 2.040232169  | 0.046528266 |
| 1628485_at   | CG6018                     | FBgn0036035 | -1.146651603 | 0.008461629 |
| 1633506_s_at | CG6091                     | FBgn0036180 | -1.245197858 | 0.021641327 |
| 1632333_at   | CG6108                     | FBgn0032498 | -1.506838709 | 0.018017088 |
| 1631794_at   | CG6201                     | FBgn0032343 | 1.222971494  | 0.049749528 |
| 1627384_at   | CG6225                     | FBgn0038072 | -1.476108054 | 0.038858087 |
| 1627000_s_at | CG6231                     | FBgn0038720 | -1.838770807 | 0.023714805 |
| 1631514_at   | CG6244                     | FBgn0036531 | 1.325108048  | 0.001796013 |
| 1637437_at   | CG6254                     | FBgn0037794 | -1.477909915 | 0.016485232 |
| 1638969_at   | CG6279                     | FBgn0036180 | 4.461781819  | 0.005280369 |
| 1634278_at   | CG6409                     | FBgn0036106 | -1.406651556 | 0.005357214 |
| 1627749_at   | CG6412                     | FBgn0032646 | -1.281959593 | 0.007471216 |
| 1622978_at   | CG6434                     | FBgn0036972 | 9.5870813    | 0.002464454 |
| 1639444_s_at | CG6454                     | FBgn0039187 | -1.215854    | 0.005252311 |
| 1634572_at   | CG6459                     | FBgn0034959 | -1.342962459 | 0.024841484 |
| 1631897_at   | CG6488                     | FBgn0032361 | -1.229789732 | 0.02824329  |
| 1636483_at   | CG6511                     | FBgn0035923 | -1.237545584 | 0.026831566 |
| 1634899_a_at | CG6512                     | FBgn0036702 | -1.242644249 | 0.039042527 |
| 1626334_at   | CG6628                     | FBgn0036072 | -1.228716247 | 0.001838802 |
| 1627888_at   | CG6672                     | FBgn0037875 | 1.241294122  | 0.053913113 |
| 1627845_at   | CG6673                     | FBgn0035906 | -1.298656606 | 0.012957512 |
| 1639157_at   | CG6765                     | FBgn0035903 | 2.07326328   | 0.014999925 |
| 1626536_at   | CG6776                     | FBgn0035904 | -1.253821233 | 0.015628833 |
| 1636295_at   | CG6796                     | FBgn0034177 | -1.314438522 | 0.02060298  |
| 1626988_at   | CG6805                     | FBgn0034179 | 1.588559544  | 0.011611611 |
| 1624692_at   | CG6830                     | FBgn0037934 | -1.330061849 | 0.01964611  |
| 1632262_at   | CG6833                     | FBgn0036005 | 1.250781606  | 0.009690994 |
| 1639986_at   | CG6854                     | FBgn0036478 | -2.472410562 | 0.005433778 |
| 1630044_s_at | CG6904 /// DanaGF17161 /// | FBgn0038293 | -1.299518045 | 0.050403549 |
| 1628420_s_at | CG6923                     | FBgn0037944 | -1.311339887 | 0.052019503 |
| 1623942_s_at | CG6974                     | FBgn0038085 | 1.860424271  | 0.032891826 |
| 1641284_a_at | CG6995                     | FBgn0039229 | -1.30210626  | 0.003845802 |
| 1638893_at   | CG7029                     | FBgn0039026 | -1.749460389 | 0.03732381  |
| 1634814_at   | CG7083                     | FBgn0035877 | 1.420827752  | 0.045737309 |
| 1628953_at   | CG7131                     | FBgn0035988 | 1.700138545  | 0.005286347 |
| 1647226_s_at | CG7145                     | FBgn0037138 | -1.509692787 | 0.03932929  |
| 1632657_at   | CG7166                     | FBgn0037107 | 1.269954375  | 0.012988314 |
| 1631098_at   | CG7194                     | FBgn0035868 | -1.514915162 | 0.025417561 |
| 1628235_at   | CG7203                     | FBgn0031942 | -14.32819528 | 0.015248261 |
| 1623992_at   | CG7229                     | FBgn0036522 | 1.37497295   | 0.035841787 |
| 1633734_at   | CG7261                     | FBgn0027509 | -1.28080573  | 0.002480538 |
| 1631121_at   | CG7267                     | FBgn0030079 | 1.361874096  | 0.032027367 |
| 1624069_at   | CG7296                     | FBgn0032283 | 3.231300673  | 0.015869585 |
| 1636156_at   | CG7372                     | FBgn0036522 | 1.37497295   | 0.052501747 |
| 1624425_at   | CG7384                     | FBgn0032262 | 1.420967279  | 0.026160224 |
| 1628512_at   | CG7441 /// Dsm1GD14730     | FBgn0036763 | -1.380688946 | 0.002805465 |
| 1624895_at   | CG7529                     | FBgn0037090 | 1.545197948  | 0.051251408 |
| 1635185_at   | CG7560                     | FBgn0036157 | 1.304001022  | 0.050164747 |
| 1631369_at   | CG7567                     | FBgn0039670 | 2.062129592  | 0.041336434 |
| 1630893_at   | CG7639                     | FBgn0033989 | -1.290130197 | 0.012922227 |
| 1632782_a_at | CG7675                     | FBgn0038610 | -1.947515756 | 0.037318328 |
| 1636240_at   | CG7678                     | FBgn0038613 | -2.233442309 | 0.034044884 |
| 1627420_s_at | CG7702                     | FBgn0038638 | -2.036730365 | 0.044242003 |
| 1624129_s_at | CG7708                     | FBgn0038641 | -1.592282884 | 0.046425578 |
| 1623612_at   | CG7722 /// Dsm1CG7722      | FBgn0033574 | -2.845272177 | 0.00054828  |
| 1635468_a_at | CG7730                     | FBgn0036689 | -1.614357389 | 0.033167707 |

|              |                           |                          |              |             |
|--------------|---------------------------|--------------------------|--------------|-------------|
| 1626144_at   | CG7763                    | FBgn0040503              | 3.689490668  | 0.006960204 |
| 1632254_at   | CG7787                    | FBgn0032020              | 1.647191549  | 0.017058387 |
| 1638964_at   | CG7800                    | FBgn0037552              | 1.629487358  | 0.048593288 |
| 163945_at    | CG7830                    | FBgn0032015              | 1.367557644  | 0.028099466 |
| 1625031_at   | CG7841                    | FBgn0036502              | -1.867010447 | 0.000256678 |
| 1627964_s_at | CG7888                    | FBgn0036116              | -3.271559101 | 0.028002488 |
| 1623570_at   | CG7924                    | FBgn0036416              | 2.474233815  | 0.03160438  |
| 1636972_at   | CG8003                    | FBgn0036096              | 1.20038541   | 0.051871966 |
| 1632490_at   | CG8008                    | FBgn0033387              | -1.52308874  | 0.023379233 |
| 1636423_at   | CG8012                    | FBgn0040832              | 4.778540347  | 0.002208072 |
| 1637607_at   | CG8027                    | FBgn0033392              | 1.457488637  | 0.040416274 |
| 1636741_at   | CG8051                    | FBgn0031012              | 1.413037142  | 0.011638187 |
| 1631190_at   | CG8089                    | FBgn0033993              | 1.269716725  | 0.0096207   |
| 1638323_at   | CG8116                    | FBgn0037614              | -1.19665864  | 0.032674399 |
| 1637971_a_at | CG8129                    | FBgn0037484              | 1.582314817  | 0.001390207 |
| 1638782_at   | CG8195                    | FBgn0034032              | 1.279591223  | 0.00371488  |
| 1637547_at   | CG8199                    | FBgn0037709              | -1.478288995 | 0.052071157 |
| 1625389_at   | CG8209                    | FBgn0035830              | -1.526335029 | 0.018018013 |
| 1629708_at   | CG8219                    | FBgn0035693              | 1.240413959  | 0.036548883 |
| 1640537_a_at | CG8234 /// Desc:CG8234    | FBgn0033644              | 1.593511651  | 0.03351321  |
| 1641525_at   | CG8236                    | FBgn0037626              | -1.275124693 | 0.047903655 |
| 1624105_at   | CG8248                    | FBgn0033347              | -1.380776676 | 0.038858307 |
| 1631225_at   | CG8317                    | FBgn0034140              | 1.495818363  | 0.039220551 |
| 1623342_at   | CG8349                    | FBgn0040532              | 2.11890171   | 0.007178899 |
| 1629018_a_at | CG8372                    | FBgn0032000              | 1.36831779   | 0.014059742 |
| 1641673_at   | CG8378                    | FBgn0027495              | 1.218252627  | 0.02516023  |
| 1633082_at   | CG8449                    | FBgn0038129              | 1.292088599  | 0.044232027 |
| 1636843_at   | CG8460                    | FBgn0030996              | 1.249304305  | 0.026402019 |
| 1629396_a_at | CG8486                    | FBgn0031993              | -1.519456107 | 0.004547383 |
| 1636158_at   | CG8492                    | FBgn0035813              | 1.596320128  | 0.01754438  |
| 1638959_at   | CG8501                    | FBgn0033724              | -2.238082679 | 0.023802068 |
| 1636431_at   | CG8768                    | FBgn0033769              | -2.11429317  | 0.051712163 |
| 1635806_s_at | CG8790                    | FBgn0029710              | -1.284252011 | 0.025791801 |
| 1637456_a_at | CG8878                    | FBgn0027504              | 1.203444826  | 0.04739726  |
| 1632625_a_at | CG8960                    | FBgn0035315              | -1.823994863 | 0.017553768 |
| 1630703_at   | CG8963                    | FBgn0034181              | -1.261007334 | 0.006426557 |
| 1637151_at   | CG9065                    | FBgn0037612              | -1.22099110  | 0.04589182  |
| 1637098_at   | CG9101                    | FBgn0030622              | -1.301908749 | 0.022197351 |
| 1633186_s_at | CG9153                    | FBgn0035207              | -1.359982732 | 0.040702163 |
| 1623778_at   | CG9162                    | FBgn0031778              | 1.366497986  | 0.01254406  |
| 163826_at    | CG9302                    | FBgn0021740              | 1.324817223  | 0.007755300 |
| 1631491_at   | CG9335                    | FBgn0032895              | -1.651526364 | 0.041854934 |
| 1624580_at   | CG9362                    | FBgn0037696              | 1.913870657  | 0.006285408 |
| 1641627_at   | CG9396                    | FBgn0037714              | 1.855920612  | 0.017485215 |
| 1623851_at   | CG9400                    | FBgn0030562              | -1.832119153 | 0.034596521 |
| 1637538_s_at | CG9485 /// Desc:CG9485    | FBgn0034618              | -1.729462022 | 0.002377373 |
| 1640488_a_at | CG9510 /// CG9515         | FBgn0032076 FBgn0032077  | 1.569073934  | 0.033761966 |
| 1623983_at   | CG9514                    | FBgn0030592              | 1.43081287   | 0.045215196 |
| 1626495_at   | CG9518                    | FBgn0032990              | 1.480521047  | 0.04625498  |
| 1634238_a_at | CG9628                    | FBgn0036433              | -1.507464059 | 0.000870169 |
| 1633224_at   | CG9631 /// DameCG9631 /// | FBgn0027563              | 1.705606688  | 0.043984842 |
| 1638190_at   | CG9667                    | FBgn0037550              | -1.385878547 | 0.04368616  |
| 1636055_at   | CG9689                    | FBgn0030996              | 1.24765909   | 0.013008846 |
| 1628187_s_at | CG9691                    | FBgn0030160              | -1.748468332 | 0.046527014 |
| 1633834_at   | CG9701                    | FBgn0036659              | -2.479842222 | 0.0092739   |
| 1635001_at   | CG9727                    | FBgn0037445              | 1.210690414  | 0.045201323 |
| 1624316_at   | CG9737                    | FBgn0039758              | -1.599850223 | 0.020760698 |
| 1632106_at   | CG9747                    | FBgn0039154              | 1.589837134  | 0.01448103  |
| 1633206_at   | CG9780                    | FBgn0037230              | 1.982315597  | 0.015022384 |
| 1637385_a_at | CG9780                    | FBgn0037230              | 2.227108225  | 0.007258219 |
| 1637792_at   | CG9791                    | FBgn0037232              | -1.363969761 | 0.016771834 |
| 1634992_s_at | CG9821 /// DsmcCG9821     | FBgn0037552              | 1.235515666  | 0.019107357 |
| 1632432_at   | CG9850                    | FBgn0034903              | -2.018840126 | 0.05261233  |
| 1630762_at   | CG9918                    | FBgn0038201              | -1.933897949 | 0.037131782 |
| 1638121_at   | CG9961                    | FBgn0031451              | -1.60763978  | 0.001304888 |
| 1639806_at   | chr                       | FBgn0021740              | -1.433197885 | 0.00400145  |
| 1632339_s_at | chr                       | FBgn0014141              | -1.52895753  | 0.00315795  |
| 1629484_s_at | chinmo                    | FBgn0086758              | -2.117839609 | 0.023045589 |
| 1628005_at   | chinmo                    | FBgn0086758              | -1.913735792 | 0.014606981 |
| 1623771_at   | ChOp24                    | FBgn0029709              | 1.219467602  | 0.027468312 |
| 1623144_at   | cl                        | FBgn0004859              | 1.277892667  | 0.045997949 |
| 1638047_at   | cnir                      | FBgn0243513 FBgn0031499  | 1.27009229   | 0.035671495 |
| 1635619_a_at | cnm                       | FBgn0013765              | 1.86476655   | 0.011975469 |
| 1636705_at   | coil                      | FBgn0003505              | -1.268959262 | 0.018011379 |
| 1636089_at   | comm                      | FBgn0010105              | 1.870870889  | 0.002395032 |
| 1635336_at   | comm2                     | FBgn0041166              | 1.6620226    | 0.041726174 |
| 1629919_at   | Cpr100A                   | FBgn0039805              | -8.739485401 | 0.012698628 |
| 1623558_at   | Cpr49Ae                   | FBgn0032028              | -2.43322029  | 0.02073377  |
| 1626386_at   | Cpr57A /// Cbp57d         | FBgn0034517 FBgn0043536  | -2.425906666 | 0.035936841 |
| 1630538_at   | Cpr60D                    | FBgn0050163              | -3.014600166 | 0.003178651 |
| 1624011_at   | Cpr768c                   | FBgn0036880              | -2.27285923  | 0.034509025 |
| 1627105_at   | CR16735                   | FBgn0037666              | 1.643705306  | 0.017251058 |
| 1632136_s_at | CR18854                   | FBgn0042174              | -1.213450283 | 0.001448103 |
| 1639109_a_at | CRMP                      | FBgn0023023              | 1.330180168  | 0.003337733 |
| 1639215_at   | Csat                      | FBgn0024994              | 1.369869378  | 0.034221142 |
| 1639039_at   | Csk                       | FBgn0025852 FBgn00259217 | -1.351948316 | 0.033022661 |
| 1632921_at   | cta                       | FBgn0003284              | 1.235288166  | 0.029896368 |
| 1627546_at   | CTCF                      | FBgn0035769              | -1.32841262  | 0.028986368 |
| 1639069_at   | Cyp12d1-d                 | FBgn0053503              | 21.79605301  | 0.017607928 |
| 1633401_s_at | Cyp12d1-d /// Cyp12d1-p   | FBgn0035903 FBgn0050489  | 6.909916769  | 0.030097547 |
| 1624911_at   | Cyp28d2                   | FBgn0003581              | -1.417055489 | 0.03662592  |
| 1632451_at   | Cyp30A1                   | FBgn0038095              | 2.804823522  | 0.032769968 |
| 1634662_at   | Cyp313a1                  | FBgn0038236              | -2.940242198 | 0.01853573  |
| 1636292_at   | Cyp313a4                  | FBgn0038076              | 2.169375812  | 0.001391424 |
| 1637858_at   | Cyp313b1                  | FBgn0036001              | 4.106352852  | 0.01369594  |
| 1634297_at   | Cyp318a1                  | FBgn0030369              | 3.480082884  | 0.050847946 |
| 1639584_at   | Cyp4ad1                   | FBgn0033292              | 2.523066678  | 0.0055255   |
| 1627180_at   | Cyp4d14                   | FBgn0023541              | 1.965997745  | 0.03981515  |
| 1625338_at   | Cyp4d20                   | FBgn0035344              | 1.428222007  | 0.006439556 |
| 1639170_at   | Cyp4d21                   | FBgn0031925              | -2.009409589 | 0.043429342 |
| 1635727_a_at | Cyp4g15                   | FBgn0030304              | 3.056640042  | 0.031047691 |
| 1628052_at   | Cyp6a7                    | FBgn0015714              | 1.706272874  | 0.054831337 |
| 1626401_at   | Cyp6a2                    | FBgn0028522              | 3.138528522  | 0.035461325 |
| 1631533_at   | Cyp6a22                   | FBgn0013773              | 1.577560135  | 0.048423819 |
| 1640755_at   | Cyp6a8                    | FBgn0013772              | 16.65588376  | 0.027506014 |
| 1625697_at   | Cyp6g1                    | FBgn0025454              | 1.841484542  | 0.027278122 |
| 1633060_at   | Cyp6g2                    | FBgn0033696              | 10.34765885  | 0.003334639 |
| 1634143_at   | Cyp6w1                    | FBgn0033965              | 1.881370991  | 0.025844741 |
| 1639495_at   | Cyp9b1                    | FBgn0015038              | 1.918428505  | 0.044528888 |
| 1627637_at   | d                         | FBgn0086896              | -1.2670455   | 0.001168181 |
| 1636539_at   | Dak1 /// Sld5             | FBgn0039403 FBgn0028833  | -1.275521013 | 0.046196653 |
| 1625199_s_at | dap                       | FBgn0010316              | 1.263054581  | 0.029157401 |
| 1637487_at   | Dcp-1                     | FBgn0010501              | -1.452300503 | 0.023187422 |
| 1639320_a_at | Ddc                       | FBgn0000422              | -2.069389192 | 0.041607604 |
| 1636493_at   | del                       | FBgn0008649              | -2.517005438 | 0.020061367 |
| 1637550_at   | desat2                    | FBgn0043043              | 1.412988373  | 0.052986648 |
| 1637896_at   | Dhc62B                    | FBgn0013811              | -1.679657016 | 0.030843064 |
| 1633854_at   | DNApol-alpha50            | FBgn0011762              | 1.466960475  | 0.01701253  |
| 1636289_s_at | DNApol-lota               | FBgn0037554              | -1.519705386 | 0.05432308  |
| 1626336_at   | dnr1                      | FBgn0043738              | -1.49438284  | 0.037995836 |
| 1631173_at   | dob                       | FBgn0030607              | 1.505961617  | 0.053614544 |
| 1635618_at   | Dok                       | FBgn0029944              | 1.557431092  | 0.034834665 |
| 1632381_at   | dome                      | FBgn0043903              | -1.24430977  | 0.048401503 |
| 1629142_at   | DopR                      | FBgn0001582              | 1.874193459  | 0.032788678 |
| 1628617_at   | dro4                      | FBgn0052282              | -3.017363136 | 0.006852677 |
| 1627327_at   | dro5                      | FBgn0035434              | -3.749435312 | 0.012729891 |
| 1630639_at   | dsd                       | FBgn0039528              | 1.430419524  | 0.003159117 |
| 1635400_at   | dtf                       | FBgn0002900              | 2.074286252  | 0.003882637 |
| 1636437_a_at | dUTPase                   | FBgn0013349 FBgn0250837  | 1.254715258  | 0.015526479 |
| 1626617_at   | dx                        | FBgn0000524              | 1.429046968  | 0.032814894 |
| 1633143_s_at | Dyrk3                     | FBgn0027101              | 1.474790471  | 0.024466544 |
| 1623244_at   | Ect4                      | FBgn0085402              | -1.220244289 | 0.021500217 |
| 1632963_at   | Ect4                      | FBgn0085402              | -1.243533989 | 0.02589178  |
| 1623380_at   | Ect4                      | FBgn0085402              | 1.229812464  | 0.020882376 |
| 1637602_at   | Edem1                     | FBgn0023511              | -1.303735915 | 0.019286166 |
| 1630203_at   | Edem2                     | FBgn0032480              | 1.252043772  | 0.006049668 |
| 1640299_at   | Eqp91                     | FBgn0045554              | 2.949345544  | 0.017863126 |
| 1638875_at   | EDTP                      | FBgn0027506              | 1.312541768  | 0.002746881 |
| 1624989_s_at | EF1alpha100E              | FBgn0000557              | 1.92331269   | 0.054854134 |
| 1623588_at   | EF1uM                     | FBgn0024556              | -1.23523451  | 0.035381085 |
| 1631621_s_at | egn                       | FBgn0014004              | -1.26288039  | 0.033745377 |
| 1629261_at   | eIF-4B                    | FBgn0020660              | 1.811142423  | 0.007056983 |
| 1633137_at   | eIF4E-6                   | FBgn0039622              | 1.199764847  | 0.007795073 |
| 1635792_a_at | Ela                       | FBgn0013949              | 1.682272791  | 0.042894881 |
| 1628091_at   | elik                      | FBgn0011589              | -1.356071589 | 0.031613994 |
| 1634035_s_at | Ephrin                    | FBgn0040324              | 1.213039615  | 0.026268555 |
| 1624560_at   | ergic53                   | FBgn0035909              | 1.276498344  | 0.042667189 |
| 1631224_at   | Est-6                     | FBgn0000592              | 2.284877258  | 0.031076307 |
| 1629064_at   | ewg                       | FBgn0005427              | 1.292314014  | 0.013542946 |



|              |                            |                                       |              |             |
|--------------|----------------------------|---------------------------------------|--------------|-------------|
| 1641473_at   | Fas3                       | FBgn0000636                           | -1.276114988 | 0.001759557 |
| 1633897_at   | Fer3                       | FBgn0037937                           | 2.682556083  | 0.002624924 |
| 1627939_a_at | ferrochelatase             | FBgn0042463                           | -1.404214603 | 0.014990765 |
| 1624444_at   | Fit                        | FBgn0003062                           | 1.207684269  | 0.015220488 |
| 1627088_at   | fit                        | FBgn0038914                           | 4.975385573  | 0.030888888 |
| 1629441_at   | Fit2                       | FBgn0036688                           | -1.69115239  | 0.000717047 |
| 1623200_at   | flng                       | FBgn0011591                           | -1.231198461 | 0.003808911 |
| 1628426_at   | Fpps                       | FBgn0025273                           | 1.556427026  | 0.036427028 |
| 1631579_a_at | fry                        | FBgn0016081                           | -1.539521128 | 0.010531936 |
| 1631139_a_at | fs(2)ItoPp43               | FBgn0004811                           | 1.331222448  | 0.019075937 |
| 1630781_at   | fs(2)ItoPp43               | FBgn0004811                           | 1.433478235  | 0.032087781 |
| 1640998_at   | fs(2)ItoPp43               | FBgn0004811                           | 1.565925211  | 0.034995931 |
| 1625341_at   | FucTC                      | FBgn0044872                           | 1.699959057  | 0.006292847 |
| 1630231_at   | fw                         | FBgn0001083                           | -1.528358864 | 0.041552834 |
| 1625139_at   | Gadd45                     | FBgn0033153                           | -2.505818057 | 0.029205301 |
| 1633914_at   | Gal                        | FBgn0001089                           | 2.044800329  | 0.008276209 |
| 1639361_a_at | garz                       | FBgn0033714                           | 1.34703593   | 0.05088543  |
| 1626899_at   | GATAd                      | FBgn0032223                           | -1.447983337 | 0.020329878 |
| 1637177_at   | gce                        | FBgn0030626                           | 2.037504624  | 0.009980258 |
| 1632728_at   | Gen2                       | FBgn0019990                           | -1.172784331 | 0.017469574 |
| 1629485_at   | gd                         | FBgn0000808                           | -1.199735741 | 0.007227153 |
| 1625947_at   | Glaz                       | FBgn0033799                           | 1.46087729   | 0.015550375 |
| 1626984_at   | Gld                        | FBgn0001112                           | -2.27886427  | 0.001407899 |
| 1634465_a_at | Gluc1alpha                 | FBgn0024963                           | -1.961055003 | 0.051158195 |
| 1630710_at   | Gluc1IA                    | FBgn0004620                           | -2.092126375 | 0.018865394 |
| 1626221_at   | Glycogenin                 | FBgn0034603                           | -1.416384866 | 0.03478586  |
| 1631620_at   | GlyP                       | FBgn0040507                           | -1.495365004 | 0.015611968 |
| 1627550_a_at | Gmpg                       | FBgn0024267                           | -1.233778434 | 0.047174554 |
| 1624124_at   | CNBP1                      | FBgn0040323                           | 1.376212427  | 0.051965673 |
| 1639116_at   | Gpb5                       | FBgn0063368                           | -1.253063911 | 0.040934823 |
| 1624042_at   | Gprk2                      | FBgn0004834                           | -3.812753689 | 4.59164E-05 |
| 1638056_at   | Gr39a                      | FBgn0011244                           | 1.329925103  | 0.050491874 |
| 1626993_at   | Gr43a                      | FBgn0031450                           | -1.598287193 | 0.011847376 |
| 1639106_at   | Grip                       | FBgn0029830                           | -1.592731779 | 0.042971724 |
| 1632681_at   | grn                        | FBgn0001138                           | 2.237599237  | 0.028701492 |
| 1625416_x_at | grp                        | FBgn0011598                           | 1.297770251  | 0.021253031 |
| 1629880_at   | Grs2                       | FBgn0001224                           | 1.48874904   | 0.023942929 |
| 1630653_a_at | Gs2                        | FBgn0001145                           | 1.3730017487 | 0.051596842 |
| 1626136_at   | GstD6                      | FBgn0010042                           | 3.963120041  | 0.005451186 |
| 1624793_at   | GstD7                      | FBgn0010043                           | 3.017917428  | 0.010517809 |
| 1624732_at   | GstE5                      | FBgn0014995                           | -2.161949235 | 0.054536166 |
| 1629953_at   | gt                         | FBgn0001150                           | -1.41338712  | 0.038833658 |
| 1626287_at   | GV1                        | FBgn0027790                           | -1.757983667 | 0.042410764 |
| 1638560_s_at | H                          | FBgn0001169                           | -1.250891507 | 0.011961524 |
| 1634779_at   | Haspin                     | FBgn0003026                           | 1.272978147  | 0.00389924  |
| 1640199_at   | Hcs                        | FBgn0037332                           | -1.214228549 | 0.043189393 |
| 1636899_s_at | hebe                       | FBgn0033448                           | -2.03038737  | 0.035424947 |
| 1625630_a_at | Hex-A                      | FBgn0001186                           | -1.334904387 | 0.016815901 |
| 1635985_at   | Hf                         | FBgn0017600                           | 1.224716408  | 0.042755346 |
| 1635666_at   | His2B.CG17949 /// His2B.CC | FBgn0061209/ FBgn0053910              | 2.943130812  | 0.017028332 |
| 1624284_a_at | hkl                        | FBgn0086441                           | -1.214910469 | 0.014705078 |
| 1628984_s_at | Hmg2                       | FBgn0010228                           | 1.348617914  | 0.005286559 |
| 1626434_s_at | HMS-Beaglepool             | FBgn0001329                           | -4.07632289  | 0.009771313 |
| 1628389_at   | Hmt-1                      | FBgn0038376                           | -1.33784873  | 0.01853005  |
| 1638325_at   | Hn                         | FBgn0001208                           | 1.64368252   | 0.041618366 |
| 1630076_at   | Hop                        | FBgn0024352                           | -1.199590221 | 0.023979804 |
| 1640577_a_at | HP5A                       | FBgn0034261                           | 1.495018496  | 0.026432091 |
| 1630393_at   | Hrs                        | FBgn0016450                           | -1.492731622 | 0.032592864 |
| 1636741_s_at | Hsc70Cb                    | FBgn0026418                           | -1.306932834 | 0.02416847  |
| 1630487_s_at | Hsp22 /// Hsp67Bb          | FBgn0001228/ FBgn0001223              | -2.558665702 | 0.02848471  |
| 1629061_s_at | Hsp22 /// Hsp67Bb          | FBgn0001228/ FBgn0001223              | -1.473346403 | 0.022668495 |
| 1641055_at   | Hsp23                      | FBgn0013524                           | -2.531139524 | 0.012219112 |
| 1635044_at   | Hsp26                      | FBgn0001225                           | -1.360386568 | 0.009774985 |
| 1628117_at   | Hsp27                      | FBgn0001226                           | -1.611945909 | 0.00675908  |
| 1626461_at   | Hsp60B /// Nccc69          | FBgn0036279                           | -1.287778974 | 0.048744428 |
| 1638484_at   | Hsp67Bc                    | FBgn0013229                           | -5.251241623 | 0.006181825 |
| 1638872_at   | Hsp68                      | FBgn0001230                           | -1.532648289 | 0.039240542 |
| 1629827_s_at | Hsp70Ba /// Hsp70Bb /// Hs | FBgn0013278/ FBgn0051354/ FBgn0013277 | -2.518672135 | 0.027190189 |
| 1632841_x_at | Hsp70Bc                    | FBgn0013279                           | -2.112989308 | 0.05413751  |
| 1623498_s_at | hsp70c                     | FBgn0002945                           | -1.280646649 | 0.014803498 |
| 1629423_at   | Ics                        | FBgn0028546                           | -1.252625637 | 0.029771703 |
| 1635389_s_at | Idgf4                      | FBgn0026415                           | 1.300760182  | 0.020674315 |
| 1631867_at   | Idgf5                      | FBgn0046237                           | 2.629748807  | 0.051631931 |
| 1633053_at   | IMI                        | FBgn0034329                           | 2.166579408  | 0.025992546 |
| 1626319_a_at | IM10                       | FBgn0060656                           | 1.698806556  | 0.026118564 |
| 1640360_at   | IM2                        | FBgn0025583                           | 1.355407507  | 0.027211833 |
| 1629530_at   | IM23                       | FBgn0034328                           | 10.94060034  | 0.01400461  |
| 1626345_at   | IM4                        | FBgn0002453                           | 3.549424189  | 0.000261321 |
| 1637332_at   | Imd                        | FBgn0013983                           | -1.20139453  | 0.024192192 |
| 1625625_at   | ImpE1                      | FBgn0001253                           | 1.913132329  | 0.016869724 |
| 1634619_at   | IP3K1                      | FBgn0032147                           | -1.24089801  | 0.003675426 |
| 1640580_at   | Ir68a                      | FBgn0036150                           | 1.284050254  | 0.023318928 |
| 1632241_at   | Ir67a                      | FBgn0001538                           | 1.352307856  | 0.032592864 |
| 1633933_at   | Ir94c                      | FBgn0051423                           | 1.865264211  | 0.019007218 |
| 1640155_at   | ire-1                      | FBgn0038736                           | -1.386033057 | 0.032114273 |
| 1634092_at   | Jard2                      | FBgn0036004                           | 1.741163481  | 0.003748208 |
| 1626414_at   | Jeh1                       | FBgn0003023                           | 1.786433023  | 0.000427825 |
| 1625587_at   | Jeh3                       | FBgn0034406                           | -2.481816873 | 0.008529315 |
| 1641021_a_at | JIL-1                      | FBgn0020412                           | 1.754341974  | 0.014871225 |
| 1628528_at   | jing                       | FBgn0086655                           | -1.219210022 | 0.049956835 |
| 1638704_at   | Kap3                       | FBgn0028421                           | -1.215947179 | 0.021626854 |
| 1641312_at   | Khc                        | FBgn0001308                           | -1.299681692 | 0.019414185 |
| 1634393_s_at | Klip10A                    | FBgn0030268                           | -1.415154923 | 0.005977394 |
| 1628601_at   | Klip64D                    | FBgn0004390                           | -1.380300484 | 0.013222466 |
| 1624121_at   | knk                        | FBgn0001911                           | -1.840191311 | 0.04193008  |
| 1626059_at   | knrl                       | FBgn0001323                           | 1.68377963   | 0.006158922 |
| 1634940_at   | kraken                     | FBgn0020545                           | -1.414749538 | 0.04799224  |
| 1636625_at   | krimp                      | FBgn0034098                           | 2.077427794  | 0.04975775  |
| 1637517_s_at | Kr19D                      | FBgn0020647                           | -1.576871922 | 0.049733539 |
| 1639411_at   | (1)C0148                   | FBgn0028360                           | -1.402615912 | 0.04680284  |
| 1628453_at   | (1)G0289                   | FBgn0028331                           | -1.207611723 | 0.02408063  |
| 1638079_at   | (2)05510                   | FBgn0028622                           | -1.256364427 | 0.030731234 |
| 1634344_at   | (2)0559                    | FBgn0004277                           | -1.33542134  | 0.004973333 |
| 163542_at    | (3)02640                   | FBgn0010786                           | -1.339180105 | 0.032927176 |
| 1632434_at   | (3)700a                    | FBgn0013563                           | -1.419753039 | 0.032182972 |
| 1629496_at   | (3)JL1231                  | FBgn0086686                           | -1.358316802 | 0.011386506 |
| 1627452_a_at | (3)mtb1                    | FBgn0020441                           | -1.272264235 | 0.018824834 |
| 1628830_at   | (3)S147910                 | FBgn0086699                           | 1.354250125  | 0.006517466 |
| 1636809_at   | Lam                        | FBgn0002525                           | 1.272903749  | 0.042793777 |
| 1629981_at   | LamC                       | FBgn0010397                           | -1.669774559 | 0.001988435 |
| 1637874_at   | LamP                       | FBgn0063485                           | 1.544271768  | 0.008915396 |
| 1629733_at   | LamT                       | FBgn0026411                           | 1.93622086   | 0.05024441  |
| 1632099_s_at | Liprin-alpha               | FBgn0046704                           | -1.301976432 | 0.017674445 |
| 1633779_s_at | loj                        | FBgn0061492                           | 1.488528317  | 0.021397158 |
| 1629212_at   | lox                        | FBgn0039848                           | -1.769626987 | 0.022737435 |
| 1639108_at   | Lsm3                       | FBgn0051184                           | 1.220001848  | 0.002231311 |
| 1626882_at   | lush                       | FBgn0020277                           | 3.263092761  | 0.029319854 |
| 1633299_at   | lz                         | FBgn0002576                           | 1.481818072  | 0.041156466 |
| 1640938_at   | mad2                       | FBgn0035640                           | -1.644945744 | 0.00083112  |
| 1641530_s_at | magu                       | FBgn0033478                           | 1.330639176  | 0.001133435 |
| 1636705_at   | mbo                        | FBgn0026207                           | 1.612355644  | 0.03338824  |
| 1628659_at   | Mdr49                      | FBgn0004512                           | -2.373426983 | 0.01084159  |
| 1626392_s_at | Mer2                       | FBgn0004367                           | 4.270633224  | 0.031909414 |
| 1635747_at   | mei-41                     | FBgn0003467                           | -1.223136137 | 0.000210605 |
| 1627465_at   | Mes4                       | FBgn0004726                           | 1.294700439  | 0.00025867  |
| 1630521_at   | Met                        | FBgn0002723                           | -1.31709554  | 0.007400758 |
| 1634290_a_at | mew                        | FBgn0004456                           | -1.224566548 | 0.048601834 |
| 1636861_at   | mib1                       | FBgn0012468                           | -1.607142468 | 0.04171251  |
| 1640497_at   | mib2                       | FBgn0086442                           | -1.360528018 | 0.020050909 |
| 1638339_at   | mip40                      | FBgn0034430                           | 1.255651987  | 0.028139989 |
| 1639183_a_at | mira                       | FBgn0002176                           | 1.660218739  | 0.037457715 |
| 1635669_a_at | mirr                       | FBgn0014343                           | -1.317437937 | 0.018514675 |
| 1633850_at   | Mis12                      | FBgn0051725                           | 2.31932145   | 0.009698814 |
| 1630916_at   | Mkk4                       | FBgn0024326                           | -1.284036904 | 0.029330004 |
| 1639980_s_at | Mip84B                     | FBgn0014863                           | -1.919729888 | 0.022409584 |
| 1625478_at   | Mnl1                       | FBgn0031885                           | 1.23365862   | 0.01543511  |
| 1635290_a_at | mol                        | FBgn0086711                           | 1.252128748  | 0.021510821 |
| 1635842_at   | mop                        | FBgn0036448                           | -1.309382558 | 0.011193898 |
| 1635259_at   | Mov34                      | FBgn0002787                           | -1.301562869 | 0.042603993 |
| 1628481_at   | mRpl1                      | FBgn0037566                           | -1.259740679 | 0.053741903 |
| 1634414_at   | mRpl23                     | FBgn0035335                           | -1.250028971 | 0.007114006 |
| 1625665_at   | mRpl39                     | FBgn0036462                           | -1.505511088 | 0.020021252 |
| 1639937_at   | mRpl4                      | FBgn0001995                           | -1.198133223 | 0.01425304  |
| 1625392_at   | mRpl42                     | FBgn0033480                           | -1.340206632 | 0.019635108 |
| 1632596_at   | mRpl44                     | FBgn0001825                           | -1.355359298 | 0.048275597 |
| 1626902_at   | mRp511                     | FBgn0038474                           | -1.412843499 | 0.028828381 |
| 1625994_a_at | mRp511                     | FBgn0038474                           | -1.286388725 | 0.018187232 |
| 1637172_at   | mRp514                     | FBgn0044030                           | -1.364836688 | 0.051204875 |
| 1631663_at   | mRp524                     | FBgn0039159                           | -1.555181729 | 0.031827645 |

|              |               |                                       |              |             |
|--------------|---------------|---------------------------------------|--------------|-------------|
| 1636679_at   | Mrf           | FBgn0052296                           | -1.383270528 | 0.009122157 |
| 1639438_at   | msl-1         | FBgn0005617                           | 1.296996872  | 0.03379181  |
| 1630477_at   | msl-3         | FBgn0045264                           | 1.440456266  | 0.00445265  |
| 1625321_a_at | mtg           | FBgn0260386/ FBgn0037559              | 1.5367296    | 0.014398215 |
| 1635397_at   | mtlh12        | FBgn0045442                           | -3.211027454 | 0.002095456 |
| 1633386_s_at | mtlh8         | FBgn0052475                           | 1.564382533  | 0.036175746 |
| 1638616_at   | mtlh9         | FBgn0035131                           | 1.92925416   | 0.015923133 |
| 162713_s_at  | Mlx           | FBgn0014845                           | 4.620618143  | 0.049364713 |
| 1631962_at   | MtnD          | FBgn0053192                           | -3.180069583 | 0.033500736 |
| 1635733_x_at | Muc96D        | FBgn0051439                           | -1.368637167 | 0.030668796 |
| 1627248_at   | mura          | FBgn0037468                           | 1.230379468  | 0.052557372 |
| 1637039_at   | mur309        | FBgn0020906                           | -1.552720992 | 0.008339514 |
| 1638278_s_at | Myo61F        | FBgn0010246                           | -2.640034287 | 0.051103257 |
| 1635349_a_at | nAcRbeta-96A  | FBgn0004118                           | -1.462941081 | 0.035336181 |
| 1624361_s_at | NA17          | FBgn0010488                           | -1.270467967 | 0.000710854 |
| 1638593_s_at | ND75          | FBgn0017566                           | -1.488023147 | 0.040795547 |
| 1639102_at   | Nelf-E        | FBgn0017430                           | 1.296674013  | 0.029439524 |
| 1626158_s_at | nes           | FBgn0026630                           | 1.221430408  | 0.009353714 |
| 1635591_at   | NjA           | FBgn0036101                           | -1.761594252 | 0.038979725 |
| 1634806_at   | nimB3         | FBgn0052003                           | 1.341911939  | 0.023271243 |
| 1630412_at   | nimB5         | FBgn0028936                           | 1.304908576  | 0.014015887 |
| 1637366_at   | nimC4         | FBgn0260011/ FBgn0028876              | -6.801918249 | 0.006281743 |
| 1641377_a_at | nompA         | FBgn0016047                           | 1.229543974  | 0.024191626 |
| 1638560_a_at | Not1          | FBgn0085436                           | 1.297636225  | 0.007784114 |
| 1629317_at   | Npip3         | FBgn0042201                           | -38.16451626 | 0.013810816 |
| 1636146_at   | Nrg           | FBgn0002968                           | -1.340082357 | 0.026064995 |
| 1625502_at   | Nrf-2r        | FBgn0032680                           | 1.277067694  | 0.018205055 |
| 1634121_at   | Obp57c        | FBgn0052609                           | -1.525746209 | 0.032572019 |
| 1638221_at   | Obp83cd       | FBgn0046878                           | 1.247311381  | 0.011653366 |
| 1637914_at   | Obp83g        | FBgn0046875                           | -2.998896365 | 0.028838766 |
| 1640107_at   | obst-A        | FBgn0031097                           | -1.94962051  | 0.047511936 |
| 1631439_at   | Odc2          | FBgn0013308                           | 1.622020065  | 0.025940675 |
| 1631474_s_at | O-fut1        | FBgn0035901                           | 1.290677922  | 0.049189242 |
| 1636807_at   | Ogg1          | FBgn0027864                           | 1.296583393  | 0.024458789 |
| 1640918_at   | ome           | FBgn0002997/ FBgn0259175              | -1.484412523 | 0.002345229 |
| 1631444_s_at | Or35a         | FBgn0028946                           | 1.250148956  | 0.000271184 |
| 1635846_s_at | orf           | FBgn0030386                           | 1.857381949  | 0.049189242 |
| 1636800_at   | Orct2         | FBgn0086365                           | -3.035806842 | 0.005685009 |
| 1628828_s_at | Oscillin      | FBgn0031717                           | 1.776090382  | 0.006139843 |
| 1631153_at   | osk           | FBgn0030315                           | 1.388557256  | 0.045027173 |
| 1630953_at   | osk           | FBgn0025106                           | 1.584105404  | 0.018632817 |
| 1633181_at   | osm-1         | FBgn0035317                           | -6.896622499 | 0.003558905 |
| 1641484_a_at | otu           | FBgn0003023                           | 1.272105509  | 0.017672365 |
| 1632207_a_at | p130CAS       | FBgn0035101                           | 2.053210675  | 0.035007627 |
| 1625544_s_at | par-1         | FBgn0023706                           | -1.235227406 | 0.016438343 |
| 1638011_a_at | Past1         | FBgn0016693                           | -1.397015796 | 0.004504709 |
| 1626624_s_at | Pax           | FBgn0041789                           | -1.473075798 | 0.027445589 |
| 1637004_at   | pcs           | FBgn0033998                           | -1.363498708 | 0.035657984 |
| 1640565_at   | Peab11        | FBgn0014995                           | -1.626202217 | 0.002192114 |
| 1641072_at   | PEK           | FBgn0037327                           | -1.356715604 | 0.032738019 |
| 1630085_s_at | Peritrophin-A | FBgn0022770                           | -1.781239694 | 0.008112376 |
| 1634913_s_at | pes           | FBgn0031969                           | -1.263203144 | 0.044562245 |
| 1622998_a_at | pik           | FBgn0025156                           | -1.206025106 | 0.016138991 |
| 1634828_at   | pgant8        | FBgn0036529                           | 2.528336231  | 0.000431628 |
| 1641723_a_at | PGRP-LC       | FBgn0035976                           | 3.208468902  | 0.045014734 |
| 1633545_at   | PGRP-SD       | FBgn0035806                           | 4.25325789   | 0.011430816 |
| 1624139_at   | Phkgamma      | FBgn0011754                           | 1.272577336  | 0.008260999 |
| 1630980_at   | phl           | FBgn0035997                           | -1.23885156  | 0.03209125  |
| 1641378_at   | phf           | FBgn0028579                           | -1.279906421 | 0.035266938 |
| 1622909_at   | Pi3K21B       | FBgn0020622                           | 1.80615495   | 0.022140649 |
| 1625233_at   | Pi3K6D        | FBgn0015278                           | 1.451195278  | 0.018771517 |
| 162863_s_at  | Pig1          | FBgn0030986                           | 1.288617496  | 0.038612242 |
| 1630919_at   | pip           | FBgn0003089                           | -1.793712081 | 0.023838499 |
| 1625595_a_at | Pis           | FBgn0030670                           | 1.25092908   | 0.018864069 |
| 1634969_at   | Pkd2          | FBgn0041195                           | -1.730131466 | 0.018015454 |
| 1640702_at   | pks8b         | FBgn0025140/ FBgn0052010/ FBgn0052011 | 2.190846175  | 0.018626217 |
| 1637078_a_at | Poxm          | FBgn0003129                           | -1.223371175 | 0.03373927  |
| 1627128_at   | ppk6          | FBgn0034489                           | 1.222645928  | 0.044956663 |
| 1633879_a_at | prd           | FBgn0003145                           | 1.451418268  | 0.001454854 |
| 1632854_s_at | Prm           | FBgn0029449                           | -1.459029621 | 0.03006989  |
| 1635974_a_at | Prox54        | FBgn0015283                           | -1.201087842 | 0.054177751 |
| 1633471_at   | Prx2540-2     | FBgn0033518                           | -1.849008256 | 0.023740001 |
| 1636266_at   | psb           | FBgn0030926                           | 1.958379001  | 0.000114561 |
| 1639136_s_at | psj           | FBgn0034999                           | -1.25265297  | 0.042643127 |
| 1627599_at   | Ptp4E         | FBgn0004368                           | -1.309261551 | 0.020201821 |
| 1635729_a_at | Ptp61F        | FBgn0003138                           | -1.557249382 | 0.005462077 |
| 1638438_a_at | Ptp61F        | FBgn0003138                           | -1.405837652 | 0.002463128 |
| 1628763_at   | Ptpmeg        | FBgn0035706                           | 1.440833476  | 0.016118949 |
| 1638100_s_at | Ptpmeg        | FBgn0035133                           | 1.760436476  | 0.003006634 |
| 1631779_s_at | ptr           | FBgn0003159                           | -2.50892614  | 0.008746286 |
| 1636728_at   | Ptr           | FBgn0033068                           | 1.904923859  | 0.02026469  |
| 1637444_s_at | puj           | FBgn0020385                           | 1.478663047  | 0.014599720 |
| 1630842_at   | Pv2           | FBgn0013988                           | -1.848474329 | 0.034471741 |
| 1638143_a_at | Pvr           | FBgn0032006                           | -1.219628414 | 0.004719024 |
| 1635967_at   | qm            | FBgn0019662                           | -1.252337429 | 0.024075828 |
| 1635961_at   | qr            | FBgn0053472                           | -1.43788836  | 0.011286959 |
| 1624076_a_at | Rab21         | FBgn0039746                           | 1.357962211  | 0.038603242 |
| 1624567_at   | Rab35         | FBgn0031090                           | -1.486461056 | 0.030455095 |
| 1628482_at   | Rab39         | FBgn0029959                           | 1.320094918  | 0.020886418 |
| 1624321_at   | Rac2          | FBgn0014011                           | -1.863272523 | 0.007165239 |
| 1626413_at   | Rap1-like     | FBgn0030479                           | -1.496030275 | 0.018361523 |
| 1634099_at   | rdg           | FBgn0003218                           | 1.871809135  | 0.035592852 |
| 1629552_at   | rdgBbeta      | FBgn0027872                           | -1.21374891  | 0.054037555 |
| 1628264_s_at | RecO5         | FBgn0027375                           | 1.467448653  | 0.002514964 |
| 1641722_at   | Rep-2         | FBgn0003497                           | 1.619713159  | 0.046818465 |
| 1627376_at   | Rei           | FBgn0014018                           | -1.79245471  | 0.045368859 |
| 1631066_at   | rib           | FBgn0003254                           | 2.936189333  | 0.01929702  |
| 1626315_at   | Rip11         | FBgn0027335                           | -1.295198134 | 0.026150664 |
| 1637799_at   | r-i           | FBgn0003557                           | -1.536770422 | 0.015368188 |
| 1633470_at   | RN-tre        | FBgn0020620                           | -1.81705027  | 0.036116545 |
| 1625146_a_at | RN-tre        | FBgn0020620                           | -1.715558513 | 0.014993611 |
| 1622996_at   | RN-tre        | FBgn0020620                           | -1.404313706 | 0.041951587 |
| 1631687_at   | RN-tre        | FBgn0020620                           | -1.400866771 | 0.040027485 |
| 1627197_at   | Rop           | FBgn0004574                           | -1.210563144 | 0.032080504 |
| 1626152_at   | Ror           | FBgn0010407                           | -1.443428855 | 0.033934047 |
| 1633905_at   | Rpl28         | FBgn0035422                           | 2.353079396  | 0.036876734 |
| 1639036_at   | Rps11         | FBgn0033699                           | 1.430621141  | 0.010527989 |
| 1634343_at   | Rpl48r        | FBgn0039788                           | 2.324754438  | 0.007448147 |
| 1634413_at   | run           | FBgn0003300                           | 1.297785243  | 0.039654569 |
| 1633452_a_at | Rya-r44F      | FBgn0011286                           | -1.359671687 | 0.054690707 |
| 1626485_at   | sad           | FBgn0003312                           | 1.433773037  | 0.054725309 |
| 1629805_at   | SAK           | FBgn0026371                           | 1.323781487  | 0.00987309  |
| 1633958_at   | SamDC         | FBgn0019932                           | 1.59798441   | 0.008440073 |
| 1635130_a_at | SamDC         | FBgn0019932                           | 1.841008984  | 0.00945924  |
| 1624083_s_at | Sam-S         | FBgn0005778                           | 1.306622725  | 0.047801141 |
| 1634385_at   | sas-6         | FBgn0039731                           | -1.20346846  | 0.046849657 |
| 1638512_at   | Sb            | FBgn0003319                           | -1.487429888 | 0.00483132  |
| 1636998_at   | sca           | FBgn0003326                           | 1.784733091  | 0.00435922  |
| 1624348_a_at | scmy          | FBgn0035633                           | -1.556601875 | 0.047192099 |
| 1629115_s_at | scrib         | FBgn0026178                           | -1.466780848 | 0.030252011 |
| 1639402_a_at | scrib         | FBgn0026178                           | -1.312755314 | 0.018350056 |
| 1632164_at   | scrib         | FBgn0026178                           | -1.310882461 | 0.026117295 |
| 1625515_a_at | sd            | FBgn0003345                           | -1.272190748 | 0.005051747 |
| 1628834_a_at | SeD           | FBgn0020615                           | -1.232715206 | 0.028468115 |
| 1639542_at   | Sema-5c       | FBgn0028791/ FBgn0250876              | 4.12888337   | 0.032541258 |
| 1630606_at   | SH3PX1        | FBgn0040475                           | -1.476062012 | 0.013967934 |
| 1632967_at   | Shc           | FBgn0015296                           | -1.289559494 | 0.043489064 |
| 1638040_at   | shd           | FBgn0033988                           | -8.20847945  | 0.00629685  |
| 1635002_at   | shd           | FBgn0003388                           | -3.397562287 | 0.037015402 |
| 1637637_at   | shi           | FBgn0003392                           | -1.315480625 | 0.033714764 |
| 1625442_a_at | Shroo         | FBgn0003392                           | -1.208414165 | 0.047425171 |
| 1629937_s_at | shu           | FBgn0085408                           | -1.413548717 | 0.053082527 |
| 1630245_at   | shu           | FBgn0006301                           | 2.04312386   | 0.030763181 |
| 1629065_s_at | SK            | FBgn0029761                           | -1.420455202 | 0.05199673  |
| 1624594_at   | SK2           | FBgn0052484                           | 1.213572248  | 0.020815335 |
| 1630957_s_at | slif          | FBgn0037203                           | -1.649499739 | 0.041823779 |
| 1631441_s_at | slow          | FBgn0056539                           | 1.866536629  | 0.015481055 |
| 1640129_at   | slp1          | FBgn0003430                           | 1.474264108  | 0.039283143 |
| 1636871_a_at | sfs           | FBgn0086906                           | -1.822154134 | 0.007045474 |
| 1635445_at   | sfs           | FBgn0086906                           | -1.571054614 | 0.02921472  |
| 1628888_at   | SMD1          | FBgn0016940                           | -1.689488592 | 0.023662724 |
| 1622932_s_at | sm            | FBgn0003447                           | 1.667027996  | 0.01833067  |
| 1632291_at   | Snap          | FBgn0250791/ FBgn0011712              | -1.258283202 | 0.017476698 |
| 1638558_a_at | Snap25        | FBgn0011288                           | -1.639544432 | 0.043666025 |
| 1628570_s_at | SNF4Agamma    | FBgn0052603                           | -1.331330105 | 0.030451052 |
| 1627015_at   | sni           | FBgn0030026                           | 1.386580998  | 0.006395993 |
| 1641725_at   | Snmp          | FBgn0260004/ FBgn0038867              | 1.82007134   | 0.039328882 |
| 1634742_at   | Sodh-2        | FBgn0022359                           | -1.64388571  | 0.046631863 |
| 1630142_at   | sog           | FBgn0003463                           | -1.250853936 | 0.009122892 |

|              |              |                         |              |              |
|--------------|--------------|-------------------------|--------------|--------------|
| 1634504_a_at | sol          | FBgn0003464             | -1.383644514 | 0.045132088  |
| 1625982_at   | SP2353       | FBgn0034070             | -1.387874067 | 0.039622107  |
| 1631087_a_at | Spargel      | FBgn0034586             | 1.303845686  | 0.002807183  |
| 1628463_at   | Spz5         | FBgn0087021 FBgn0040494 | 1.979615166  | 0.001518186  |
| 1631543_at   | spd-2        | FBgn0027500             | 1.233610258  | 0.008601938  |
| 1631650_a_at | spirit       | FBgn0030051             | 1.705149617  | 0.016747327  |
| 1633021_s_at | Spn          | FBgn0019005             | -1.618564659 | 0.035665866  |
| 1636145_at   | Spn20D       | FBgn0031973             | -1.965831748 | 0.040333071  |
| 1636784_at   | Spn3         | FBgn0028986             | -1.320477757 | 0.005170603  |
| 1636639_at   | Spp          | FBgn0031260             | 1.300306446  | 0.0241101374 |
| 1623478_at   | SPR          | FBgn0029768             | 1.989101184  | 0.019940235  |
| 1626448_at   | Sp5          | FBgn0041773             | -1.494141388 | 0.009706996  |
| 1625352_s_at | Spt-1        | FBgn0086532             | -1.256045158 | 0.012827379  |
| 1641068_a_at | spz          | FBgn0003495             | -1.429401955 | 0.020224933  |
| 1636668_at   | spz5         | FBgn0035379             | -1.836594758 | 0.042973175  |
| 1625198_at   | ss           | FBgn0003513             | -1.728395444 | 0.016854853  |
| 1640859_at   | Sse          | FBgn0035627             | -1.951968809 | 0.036021644  |
| 1632670_at   | ssp2         | FBgn0036389             | -1.240093013 | 0.004025111  |
| 1626294_a_at | stal         | FBgn0051641             | 4.433645229  | 0.007665347  |
| 1627533_at   | stj          | FBgn0003870             | -1.710826351 | 0.035254917  |
| 1632946_at   | Stik         | FBgn0046692             | 1.403672788  | 0.000279726  |
| 1638804_a_at | Stik         | FBgn0046692             | 1.742882125  | 0.008908404  |
| 1634364_a_at | stv          | FBgn0086708             | -2.108816163 | 0.001801139  |
| 1629921_a_at | Sut(1)       | FBgn0004037             | -1.400847589 | 0.038033895  |
| 1626862_at   | Sut(var)3-7  | FBgn0003598             | 1.401040182  | 0.013156083  |
| 1629963_at   | sut1         | FBgn0028563             | -1.279548649 | 0.013446317  |
| 1629866_at   | Suv4-20      | FBgn0025639             | 1.264692517  | 0.022140486  |
| 1628930_at   | sw2          | FBgn0036562             | 1.436626552  | 0.053197522  |
| 1639431_at   | synaptogyrin | FBgn0033876             | -1.433337488 | 0.053991142  |
| 1630803_at   | Taf10b       | FBgn0026324             | 1.410361502  | 0.007082875  |
| 1623899_at   | Takr99D      | FBgn0004622             | 1.649038407  | 0.02351632   |
| 1639330_s_at | Tao-1        | FBgn0031030             | -1.326579987 | 0.032424592  |
| 1629676_at   | Tbp-1        | FBgn0028684             | -1.326278114 | 0.032327054  |
| 1626845_at   | Tcp-leta     | FBgn0037632             | -1.27093625  | 0.001883837  |
| 1623755_at   | Ten-a        | FBgn0004446 FBgn0259240 | -1.909842057 | 0.012048717  |
| 163006_a_at  | Tepl1        | FBgn0041182             | 1.476844913  | 0.007256242  |
| 1623753_at   | Tepl1l       | FBgn0051520             | -1.288463498 | 0.046528815  |
| 1628008_a_at | TER94        | FBgn0024923             | -1.27782476  | 0.014618858  |
| 1636787_s_at | th           | FBgn0003691             | -1.313448833 | 0.017503826  |
| 1634188_a_at | tim          | FBgn0014396             | -1.3859546   | 0.038284534  |
| 1640773_at   | tow          | FBgn0042917             | 2.14429019   | 0.008917194  |
| 1635491_s_at | TRAM         | FBgn0040340             | 1.382920606  | 0.037656643  |
| 1635692_s_at | Treh         | FBgn0003748             | -1.299662174 | 0.026565938  |
| 1623736_at   | trh          | FBgn0003749             | 3.305396482  | 0.013024053  |
| 1635043_s_at | trio         | FBgn0015277             | -2.24161428  | 0.01128246   |
| 1623731_at   | trk          | FBgn0003751             | -1.46098868  | 0.018026612  |
| 1639235_at   | trn          | FBgn0010452             | -1.660212985 | 0.015791808  |
| 1630732_at   | Trn-SR       | FBgn0031456             | -1.228286122 | 0.041017936  |
| 1641487_a_at | Trn-1        | FBgn0020653             | -1.322407166 | 0.011254729  |
| 1632430_at   | Tsf1         | FBgn0022355             | 2.754320923  | 0.028395031  |
| 1639442_a_at | Tsf1         | FBgn0022355             | 7.587239086  | 0.000235674  |
| 1641143_s_at | tsl          | FBgn0003867             | 1.366897744  | 0.046300607  |
| 1624907_at   | Tsp42Ee      | FBgn0003606             | 1.38085165   | 0.045252861  |
| 1634977_at   | Tsp42Er      | FBgn0033139             | 2.025746058  | 0.049788009  |
| 1635267_s_at | Tsp64E       | FBgn0035936             | 1.879210483  | 0.049617081  |
| 1626546_s_at | Tsp74F       | FBgn0036769             | -1.534818791 | 0.019970882  |
| 1625279_a_at | tup          | FBgn0038996             | -1.450932094 | 0.006297932  |
| 1638786_at   | Twd1alpha    | FBgn0052574             | 1.684863451  | 0.031345335  |
| 1629531_at   | Twd1k        | FBgn0039439             | 1.374006028  | 0.035314353  |
| 1637472_at   | Twd1Y        | FBgn0052570             | 1.217637757  | 0.017937975  |
| 1629493_at   | U26          | FBgn0027780             | -1.380349913 | 0.039368821  |
| 1637579_s_at | Ucd2         | FBgn0051520             | -1.198457158 | 0.02500674   |
| 1636463_at   | Ucp4B        | FBgn0031758             | -3.664445734 | 0.030601351  |
| 1634681_a_at | Ucp4B        | FBgn0031758             | -2.866429905 | 0.013550988  |
| 1640109_at   | Ugt37b1      | FBgn0026755             | 3.240676475  | 0.044919495  |
| 1641481_at   | Ugt86bd      | FBgn0040248             | 2.40548148   | 0.00800456   |
| 1635684_a_at | unc-13       | FBgn0025726             | 1.794534924  | 0.025541698  |
| 1623019_a_at | Unc-89       | FBgn0053519             | -1.64249047  | 0.046077052  |
| 1639230_at   | v(2)k05816   | FBgn0046227             | -1.263750503 | 0.00646304   |
| 1636264_at   | VACht        | FBgn0015240             | -1.824124087 | 0.010301202  |
| 1636614_a_at | vav          | FBgn0040068             | -1.430464142 | 0.007920034  |
| 1634961_s_at | Vha68-2      | FBgn0020367             | -1.236568077 | 0.047496522  |
| 1641150_at   | vih          | FBgn0027936             | 1.28170570   | 0.010615601  |
| 1624091_s_at | wge          | FBgn0014551             | -1.297761758 | 0.033446321  |
| 1633272_s_at | wnd          | FBgn0036896             | 1.273667176  | 0.017765411  |
| 1632524_at   | Wnt4         | FBgn0010453             | 1.355565665  | 0.033445627  |
| 1632856_a_at | Xe7          | FBgn0010772             | -1.271960028 | 0.034811318  |
| 1625405_at   | yellow-c     | FBgn0041713             | -1.652169457 | 0.052742386  |
| 1637370_at   | yellow-f     | FBgn0041710             | 1.779322885  | 0.004643774  |
| 1631326_at   | Zasp66       | FBgn0035917             | -2.0020944   | 0.004645567  |
| 1634521_at   | zetaCOP      | FBgn0050512             | 1.238709882  | 0.023739401  |
| 1627840_a_at | zip          | FBgn0035634             | -1.403437878 | 0.011429116  |
| 1635291_a_at | Zr72D        | FBgn0017453             | -1.264991859 | 0.005113499  |
| 1640817_at   | zormin       | FBgn0052311             | -2.032414976 | 0.025509741  |
| 1626878_at   |              | FBgn0036944             | -1.439493891 | 0.018064758  |
| 1634756_at   |              | FBgn0037212             | 1.793212755  | 0.05082422   |
| 1636821_at   |              | FBgn0038369             | -1.200778458 | 0.047759247  |
| 1633336_at   |              | FBgn0052560             | -1.312008136 | 0.036047879  |
| 1627241_at   |              | FBgn0052696             | 1.303760013  | 0.011989744  |
| 1635609_at   |              | FBgn0058294             | 1.983928455  | 0.01003224   |
| 1639114_at   |              | FBgn0028582             | -1.388515043 | 0.045922386  |
| 1641442_a_at |              | FBgn001402              | -1.49229387  | 0.03920952   |
| 1623383_at   |              | FBgn0010349             | -1.378975349 | 0.006948732  |
| 1637137_a_at |              | FBgn0010349             | 2.32430142   | 0.005283858  |
| 1635738_at   |              | FBgn0028915             | 3.22095869   | 0.036342087  |
| 1629086_s_at |              | FBgn0017539             | -1.318584475 | 0.042046266  |
| 1637439_at   |              | FBgn0025701             | -1.316630022 | 0.052375982  |
| 1625830_a_at |              | FBgn0026173             | -1.201279339 | 0.036495966  |
| 1635161_at   |              | FBgn0028915             | -1.943533084 | 0.00636739   |
| 1634430_at   |              | FBgn0031186             | 1.234876416  | 0.051458949  |
| 1636095_at   |              | FBgn0032166             | 1.44649366   | 0.022726731  |
| 1626466_at   |              | FBgn0033303             | -1.911142032 | 0.03095011   |
| 1637604_at   |              | FBgn0033771             | 1.345976604  | 0.052963438  |
| 1625259_at   |              | FBgn0033990             | 1.442653669  | 0.046156526  |
| 1627761_at   |              | FBgn0036930             | -1.303821768 | 0.013989258  |
| 1629677_at   |              | FBgn0037307             | 1.71778959   | 0.000548519  |
| 1639493_at   |              | FBgn0038160             | 1.24289119   | 0.009137563  |
| 1632520_at   |              | FBgn0038554             | 1.360051863  | 0.039816327  |
| 1623619_at   |              | FBgn0038785             | 1.226262917  | 0.049227315  |
| 1635975_s_at |              | FBgn0047095             | -2.793889573 | 0.008122123  |
| 1629152_at   |              | FBgn0051451             | -1.509532341 | 0.024952897  |
| 1634181_x_at |              | FBgn0052865             | -1.459905514 | 0.010744784  |
| 1638885_at   |              | FBgn0053318             | 1.440849849  | 0.022893722  |
| 1625210_a_at |              | FBgn0053715             | -1.793964904 | 0.007671341  |
| 1632945_at   |              | FBgn0053715             | -1.712663434 | 0.011135308  |
| 1640120_at   |              | FBgn0058088             | 1.539177257  | 0.045120325  |
| 1636506_at   |              | FBgn0058116             | 1.203439265  | 0.024530305  |
| 1626876_x_at |              | FBgn0058119             | 3.252641154  | 0.010585201  |
| 1628441_at   |              | FBgn0058138             | 1.314163702  | 0.001649063  |
| 1638402_at   |              | FBgn0058195             | 1.265744896  | 0.02382415   |
| 1635837_at   |              | FBgn0058203             | 1.536607109  | 0.03572456   |
| 1630520_s_at |              | FBgn0062961             | 4.006682894  | 0.00824837   |
| 1634348_s_at |              | FBgn0063127             | 3.77175683   | 0.02180397   |
| 1639912_x_at |              | FBgn0085161             | 1.589112945  | 0.012399676  |

Supplemental Table 2. Differential Transcriptome Expression under Chronic Hypoxia

| Ensembl_gene | Symbol   | fold-hxnf_vs_nxnf | rawp-hxnf_vs_nxnf | ANNOTATION_SYMBOL |
|--------------|----------|-------------------|-------------------|-------------------|
| FBgn0020766  | Aats-phe | 1.756604456       | 0.002156119       | CG13348           |
| FBgn0038173  | Adgf-C   | 1.472849373       | 0.015066396       | CG9345            |
| FBgn0039747  | AdoR     | 1.859096908       | 0.002851497       | CG9753            |
| FBgn0086782  | amn      | 1.551208848       | 0.036633941       | CG11937           |
| FBgn0000116  | Argk     | -1.424286483      | 0.018940332       | CG32031           |
| FBgn0020762  | Atet     | 1.421956762       | 0.009253354       | CG2969            |
| FBgn0014135  | bnl      | 2.900850381       | 4.59012E-05       | CG4608            |
| FBgn0026261  | bonsai   | -1.396615056      | 0.036226103       | CG4207            |
| FBgn0037963  | Cad87A   | -1.45868439       | 0.018409183       | CG6977            |
| FBgn0010014  | CanB     | -1.819650163      | 0.0162435         | CG4209            |
| FBgn0038147  | CCHa2    | 1.541345755       | 0.041613151       | CG14375           |
| FBgn0039774  | CDase    | 1.577631504       | 0.038761443       | CG1471            |
| FBgn0034644  | CG10082  | -1.505655021      | 0.042202252       | CG10082           |
| FBgn0039094  | CG10184  | -1.779832996      | 0.005130827       | CG10184           |
| FBgn0032685  | CG10211  | 3.039460788       | 0.003554841       | CG10211           |
| FBgn0035452  | CG10359  | 1.894178606       | 0.000922052       | CG10359           |
| FBgn0032717  | CG10600  | 1.473997664       | 0.037631338       | CG10600           |
| FBgn0033830  | CG10814  | 4.374498015       | 0.018509847       | CG10814           |
| FBgn0038621  | CG10864  | -1.506690978      | 0.01328557        | CG10864           |
| FBgn0037238  | CG10900  | 1.990996966       | 0.019826095       | CG10900           |
| FBgn0036316  | CG10960  | 1.593315817       | 0.004279334       | CG10960           |
| FBgn0039930  | CG11077  | 1.321074623       | 0.044909705       | CG11077           |
| FBgn0034485  | CG11099  | -1.516384769      | 0.013424542       | CG11099           |
| FBgn0037290  | CG11124  | -1.587247412      | 0.003153429       | CG11124           |
| FBgn0031883  | CG11266  | 1.330448538       | 0.049508661       | CG11266           |
| FBgn0034706  | CG11275  | 1.487343702       | 0.03713404        | CG11275           |
| FBgn0031835  | CG11319  | -1.341448659      | 0.037514507       | CG11319           |
| FBgn0024366  | CG11409  | -1.385817832      | 0.038203216       | CG11409           |
| FBgn0039666  | CG11501  | 12.13513385       | 0.016172735       | CG11501           |
| FBgn0040531  | CG11741  | 2.469579338       | 0.006490359       | CG11741           |
| FBgn0039306  | CG11859  | 1.372729852       | 0.020283367       | CG11859           |
| FBgn0037386  | CG12080  | -1.626331926      | 0.00860623        | CG12080           |
| FBgn0039419  | CG12290  | 1.381558272       | 0.028090179       | CG12290           |
| FBgn0030676  | CG12379  | 1.639267839       | 0.005350818       | CG12379           |
| FBgn0038202  | CG12402  | -1.715253984      | 0.025347521       | CG12402           |
| FBgn0031080  | CG12655  | -4.843743471      | 0.011494672       | CG12655           |
| FBgn0030666  | CG12708  | -1.762711731      | 0.036039826       | CG12708           |
| FBgn0037796  | CG12814  | 1.584212973       | 0.014856817       | CG12814           |
| FBgn0033523  | CG12895  | -1.488366344      | 0.008692836       | CG12895           |
| FBgn0033481  | CG12920  | 1.521630708       | 0.03553398        | CG12920           |
| FBgn0037078  | CG12971  | 8.344122775       | 0.002015232       | CG12971           |
| FBgn0030826  | CG12995  | 5.074124132       | 0.001449758       | CG12995           |
| FBgn0036589  | CG13067  | 1.6487031         | 0.027771702       | CG13067           |
| FBgn0033736  | CG13154  | -1.572956583      | 0.012309947       | CG13154           |
| FBgn0033661  | CG13185  | 1.396610454       | 0.040007789       | CG13185           |
| FBgn0036479  | CG13458  | -1.54538044       | 0.01866408        | CG13458           |
| FBgn0034670  | CG13488  | -1.813215931      | 0.047728254       | CG13488           |
| FBgn0034965  | CG13568  | -1.431016292      | 0.041376827       | CG13568           |
| FBgn0039161  | CG13606  | 1.659687598       | 0.007261989       | CG13606           |
| FBgn0039232  | CG13636  | -2.000188241      | 0.038567173       | CG13636           |
| FBgn0035578  | CG13707  | -1.867093959      | 0.012680298       | CG13707           |
| FBgn0033353  | CG13749  | 3.007895894       | 0.04788377        | CG13749           |
| FBgn0031939  | CG13796  | 1.503181413       | 0.021075236       | CG13796           |
| FBgn0034486  | CG13869  | -1.510153478      | 0.021577734       | CG13869           |
| FBgn0025712  | CG13920  | -1.325206698      | 0.03208451        | CG13920           |
| FBgn0038695  | CG14280  | 2.871928599       | 0.049016141       | CG14280           |
| FBgn0032900  | CG14401  | 1.684439118       | 0.01952125        | CG14401           |
| FBgn0033464  | CG14410  | -2.703438786      | 0.001671382       | CG14410           |
| FBgn0039620  | CG14430  | 1.896120163       | 0.007544902       | CG14430           |
| FBgn0037127  | CG14566  | 24.60481479       | 0.000673327       | CG14566           |
| FBgn0062442  | CG14580  | -1.263534479      | 0.050314005       | CG14580           |
| FBgn0250821  | CG14644  | 2.279779682       | 0.015490831       | CG14644           |
| FBgn0037288  | CG14661  | -1.471562212      | 0.021056609       | CG14661           |
| FBgn0037835  | CG14687  | -1.309725298      | 0.03772135        | CG14687           |
| FBgn0033274  | CG14757  | -1.59290378       | 0.00294812        | CG14757           |
| FBgn0027793  | CG14787  | 1.800699291       | 0.036194753       | CG14787           |
| FBgn0026088  | CG14818  | 1.386639701       | 0.01261673        | CG14818           |
| FBgn0035409  | CG14963  | 1.691639399       | 0.017620406       | CG14963           |
| FBgn0035541  | CG15019  | 1.302025584       | 0.049086644       | CG15019           |
| FBgn0030929  | CG15043  | 4.103027645       | 0.025501972       | CG15043           |
| FBgn0030270  | CG15199  | -1.503063153      | 0.032481758       | CG15199           |
| FBgn0040718  | CG15353  | -1.795912955      | 0.048192124       | CG15353           |

|             |         |              |             |         |
|-------------|---------|--------------|-------------|---------|
| FBgn0039742 | CG15528 | -1.42002754  | 0.020928125 | CG15528 |
| FBgn0033224 | CG1553  | -1.681250327 | 0.046559184 | CG1553  |
| FBgn0031630 | CG15629 | 2.425458087  | 0.017498492 | CG15629 |
| FBgn0038833 | CG15696 | 2.168813039  | 0.028776792 | CG15696 |
| FBgn0030482 | CG1673  | 1.43657987   | 0.039408844 | CG1673  |
| FBgn0028931 | CG16863 | -1.638142072 | 0.044200637 | CG16863 |
| FBgn0040972 | CG16978 | -1.672253644 | 0.011354206 | CG16978 |
| FBgn0035355 | CG16985 | -1.41992284  | 0.049247987 | CG16985 |
| FBgn0035144 | CG17181 | 1.664873258  | 0.007993292 | CG17181 |
| FBgn0038761 | CG17190 | 1.772972213  | 0.001871017 | CG17190 |
| FBgn0038850 | CG17279 | 3.789265405  | 0.008709461 | CG17279 |
| FBgn0033802 | CG17724 | 1.995814271  | 0.009676701 | CG17724 |
| FBgn0037433 | CG17919 | -1.346213528 | 0.035420274 | CG17919 |
| FBgn0030360 | CG1806  | -1.437974087 | 0.016771099 | CG1806  |
| FBgn0034382 | CG18609 | -1.285031179 | 0.046944763 | CG18609 |
| FBgn0026563 | CG1979  | -1.905862254 | 0.026097565 | CG1979  |
| FBgn0000299 | Cg25C   | 1.627004558  | 0.016040515 | CG4145  |
| FBgn0031564 | CG2816  | 2.575508795  | 0.012923107 | CG2816  |
| FBgn0040391 | CG2854  | 2.662972187  | 0.045887888 | CG2854  |
| FBgn0029728 | CG2861  | -1.772992635 | 0.009207684 | CG2861  |
| FBgn0031474 | CG2991  | 1.524170545  | 0.025590407 | CG2991  |
| FBgn0050108 | CG30108 | 1.338761712  | 0.027008329 | CG30108 |
| FBgn0050178 | CG30178 | -1.559737835 | 0.027646483 | CG30178 |
| FBgn0050187 | CG30187 | 1.447420176  | 0.018874813 | CG30187 |
| FBgn0043792 | CG30427 | -2.398672556 | 0.000858436 | CG30427 |
| FBgn0050488 | CG30488 | 2.007831346  | 0.046788851 | CG30488 |
| FBgn0034816 | CG3085  | 1.765827987  | 0.019919336 | CG3085  |
| FBgn0051051 | CG31051 | 2.619220677  | 0.008371856 | CG31051 |
| FBgn0051103 | CG31103 | -1.300971956 | 0.050130837 | CG31103 |
| FBgn0051259 | CG31259 | 1.982855941  | 0.00307454  | CG31259 |
| FBgn0051469 | CG31469 | 1.471319306  | 0.037221399 | CG31469 |
| FBgn0051619 | CG31619 | 2.399571576  | 0.011549691 | CG31619 |
| FBgn0051636 | CG31636 | 1.408064989  | 0.042593573 | CG31636 |
| FBgn0051674 | CG31674 | -1.606935365 | 0.012639629 | CG31674 |
| FBgn0051675 | CG31675 | 1.488779074  | 0.017520388 | CG31675 |
| FBgn0051821 | CG31821 | -2.31388699  | 0.000616759 | CG31821 |
| FBgn0051823 | CG31823 | -2.167615785 | 0.000648726 | CG31823 |
| FBgn0032079 | CG31886 | 1.407916907  | 0.012170179 | CG31886 |
| FBgn0260479 | CG31904 | 1.524167453  | 0.046676787 | CG31904 |
| FBgn0023525 | CG3191  | 1.475543025  | 0.020147395 | CG3191  |
| FBgn0051974 | CG31974 | 1.686586931  | 0.039477187 | CG31974 |
| FBgn0051997 | CG31997 | 1.348914445  | 0.032896461 | CG31997 |
| FBgn0052037 | CG32037 | 1.760790056  | 0.025134503 | CG32037 |
| FBgn0052055 | CG32055 | 1.891039884  | 0.047811842 | CG32055 |
| FBgn0052170 | CG32170 | 1.510284159  | 0.030685862 | CG32170 |
| FBgn0052373 | CG32373 | 1.703252072  | 0.00480027  | CG32373 |
| FBgn0043783 | CG32444 | -1.573120712 | 0.028729136 | CG32444 |
| FBgn0052512 | CG32512 | 1.628841318  | 0.004301027 | CG32512 |
| FBgn0052687 | CG32687 | 1.549960132  | 0.024318092 | CG32687 |
| FBgn0053007 | CG33007 | 1.597844983  | 0.039463007 | CG33007 |
| FBgn0053260 | CG33260 | 1.918068063  | 0.002125822 | CG33260 |
| FBgn0053460 | CG33460 | 1.615921207  | 0.030598324 | CG33460 |
| FBgn0034997 | CG3376  | 1.384128621  | 0.035797359 | CG3376  |
| FBgn0061361 | CG33786 | 1.504000528  | 0.025549779 | CG33786 |
| FBgn0035240 | CG33791 | -2.800073468 | 0.021678336 | CG33791 |
| FBgn0033095 | CG3409  | 1.301979553  | 0.045353088 | CG3409  |
| FBgn0085201 | CG34172 | -1.46372073  | 0.005714684 | CG34172 |
| FBgn0085268 | CG34239 | -1.37782409  | 0.037539922 | CG34239 |
| FBgn0085285 | CG34256 | 2.015194786  | 0.024069083 | CG34256 |
| FBgn0085356 | CG34327 | -1.962534072 | 0.005978005 | CG34327 |
| FBgn0085359 | CG34330 | 14.19132417  | 8.47211E-07 | CG34330 |
| FBgn0085409 | CG34380 | 2.42496528   | 0.002027705 | CG34380 |
| FBgn0085427 | CG34398 | 1.789329151  | 0.003222758 | CG34398 |
| FBgn0085466 | CG34437 | 1.801575543  | 0.041291731 | CG34437 |
| FBgn0085474 | CG34445 | -1.661652189 | 0.020918779 | CG34445 |
| FBgn0085475 | CG34446 | -1.449352273 | 0.031231466 | CG34446 |
| FBgn0085484 | CG34455 | -1.399776664 | 0.043551865 | CG34455 |
| FBgn0035039 | CG3608  | -1.413940409 | 0.024155063 | CG3608  |
| FBgn0036684 | CG3764  | 1.619816494  | 0.010139409 | CG3764  |
| FBgn0058298 | CG40298 | -1.45841655  | 0.006478251 | CG40298 |
| FBgn0029791 | CG4096  | 1.993194486  | 0.000390101 | CG4096  |
| FBgn0025627 | CG4194  | -1.720115898 | 0.003094633 | CG4194  |
| FBgn0259201 | CG42305 | -1.633622546 | 0.028186103 | CG42305 |

|             |         |              |             |         |
|-------------|---------|--------------|-------------|---------|
| FBgn0259219 | CG42319 | -1.590440713 | 0.006389404 | CG42319 |
| FBgn0259735 | CG42389 | 1.385196785  | 0.046890855 | CG42389 |
| FBgn0259740 | CG42394 | -1.377146707 | 0.0471877   | CG42394 |
| FBgn0260645 | CG42537 | 1.496210239  | 0.037860185 | CG42537 |
| FBgn0260965 | CG42588 | 1.412560861  | 0.00926107  | CG42588 |
| FBgn0261555 | CG42673 | 1.371518526  | 0.029275813 | CG42673 |
| FBgn0261611 | CG42700 | 2.260245948  | 0.000788506 | CG42700 |
| FBgn0261859 | CG42788 | 1.266419336  | 0.04518036  | CG42788 |
| FBgn0262508 | CG43078 | 1.454919541  | 0.013975256 | CG43078 |
| FBgn0262539 | CG43093 | -1.615889287 | 0.010151624 | CG43093 |
| FBgn0262599 | CG43129 | -1.545506353 | 0.00476095  | CG43129 |
| FBgn0263029 | CG43324 | 1.515852042  | 0.011256712 | CG43324 |
| FBgn0263031 | CG43326 | -1.379605771 | 0.042626651 | CG43326 |
| FBgn0035982 | CG4461  | 2.183714046  | 0.001504375 | CG4461  |
| FBgn0033809 | CG4630  | -1.644504863 | 0.029078046 | CG4630  |
| FBgn0031307 | CG4726  | 16.15526752  | 3.99493E-06 | CG4726  |
| FBgn0038774 | CG5023  | -1.663529133 | 0.001360794 | CG5023  |
| FBgn0039356 | CG5039  | 1.4325958    | 0.036830917 | CG5039  |
| FBgn0034145 | CG5065  | 2.400834776  | 0.003755616 | CG5065  |
| FBgn0031908 | CG5177  | -1.438469493 | 0.013581396 | CG5177  |
| FBgn0038484 | CG5246  | -3.592591105 | 0.018076699 | CG5246  |
| FBgn0038977 | CG5376  | -1.286540189 | 0.030787412 | CG5376  |
| FBgn0031327 | CG5397  | 1.562089358  | 0.039619323 | CG5397  |
| FBgn0038052 | CG5538  | 1.915140323  | 0.0217755   | CG5538  |
| FBgn0039527 | CG5639  | 1.67283525   | 0.008475778 | CG5639  |
| FBgn0035948 | CG5644  | -1.689875307 | 0.033243448 | CG5644  |
| FBgn0032494 | CG5945  | -1.640433563 | 0.004826246 | CG5945  |
| FBgn0038083 | CG5999  | -2.31897795  | 0.009853387 | CG5999  |
| FBgn0036186 | CG6071  | 1.555333736  | 0.041352822 | CG6071  |
| FBgn0026079 | CG6133  | 1.502925263  | 0.042375799 | CG6133  |
| FBgn0036152 | CG6175  | 1.301986111  | 0.028272815 | CG6175  |
| FBgn0038072 | CG6225  | -1.420576814 | 0.033649918 | CG6225  |
| FBgn0033872 | CG6329  | -1.619110884 | 0.009754124 | CG6329  |
| FBgn0034247 | CG6484  | -1.793179787 | 0.009754984 | CG6484  |
| FBgn0027550 | CG6495  | 1.627270546  | 0.004440745 | CG6495  |
| FBgn0032298 | CG6724  | 1.412480045  | 0.013352978 | CG6724  |
| FBgn0033562 | CG6751  | 1.286271006  | 0.033309238 | CG6751  |
| FBgn0030878 | CG6769  | 1.350602306  | 0.042524295 | CG6769  |
| FBgn0030884 | CG6847  | 1.605913709  | 0.012346938 | CG6847  |
| FBgn0036240 | CG6928  | 1.741227453  | 0.00289912  | CG6928  |
| FBgn0039000 | CG6954  | 1.402464866  | 0.039668439 | CG6954  |
| FBgn0031971 | CG7224  | 3.782029547  | 0.001663745 | CG7224  |
| FBgn0031970 | CG7227  | 1.479772832  | 0.032919153 | CG7227  |
| FBgn0032283 | CG7296  | 2.322119189  | 0.00619423  | CG7296  |
| FBgn0036939 | CG7365  | 2.241409502  | 0.005063685 | CG7365  |
| FBgn0036179 | CG7368  | 2.717003158  | 0.000230236 | CG7368  |
| FBgn0035689 | CG7376  | 1.444377451  | 0.027527959 | CG7376  |
| FBgn0036763 | CG7441  | -1.307316209 | 0.041155641 | CG7441  |
| FBgn0036168 | CG7512  | 1.491193048  | 0.044135387 | CG7512  |
| FBgn0027583 | CG7601  | -1.304211812 | 0.03456158  | CG7601  |
| FBgn0036145 | CG7607  | 1.563997751  | 0.027005687 | CG7607  |
| FBgn0033633 | CG7759  | -1.407727401 | 0.023697964 | CG7759  |
| FBgn0040503 | CG7763  | -1.988401923 | 0.012649517 | CG7763  |
| FBgn0031008 | CG8010  | 1.461776181  | 0.017141408 | CG8010  |
| FBgn0040832 | CG8012  | 2.04680344   | 0.009844532 | CG8012  |
| FBgn0037607 | CG8036  | -1.254794212 | 0.049435349 | CG8036  |
| FBgn0038597 | CG8064  | 1.481405719  | 0.008609471 | CG8064  |
| FBgn0033913 | CG8468  | 1.517353752  | 0.022466017 | CG8468  |
| FBgn0035813 | CG8492  | -1.826225753 | 0.002022604 | CG8492  |
| FBgn0033734 | CG8520  | -1.445595582 | 0.029950162 | CG8520  |
| FBgn0038130 | CG8630  | 4.240455557  | 0.007311341 | CG8630  |
| FBgn0033763 | CG8646  | 8.414544042  | 4.28681E-05 | CG8646  |
| FBgn0031986 | CG8673  | -1.525045816 | 0.042325052 | CG8673  |
| FBgn0033257 | CG8713  | -1.542190852 | 0.004212869 | CG8713  |
| FBgn0027585 | CG8740  | 1.400654873  | 0.021423917 | CG8740  |
| FBgn0033760 | CG8785  | 2.104743266  | 0.003617353 | CG8785  |
| FBgn0033733 | CG8834  | 7.067045105  | 0.021386086 | CG8834  |
| FBgn0034497 | CG9090  | -2.048454704 | 0.000770748 | CG9090  |
| FBgn0035192 | CG9194  | -1.730166012 | 0.005744439 | CG9194  |
| FBgn0032512 | CG9305  | 1.390106781  | 0.030037051 | CG9305  |
| FBgn0030574 | CG9413  | 1.315496306  | 0.025097982 | CG9413  |
| FBgn0030588 | CG9521  | 16.83288445  | 1.92267E-05 | CG9521  |
| FBgn0038365 | CG9593  | 1.563766379  | 0.005211486 | CG9593  |

|             |              |              |             |           |
|-------------|--------------|--------------|-------------|-----------|
| FBgn0036259 | CG9760       | -1.718786009 | 0.001846043 | CG9760    |
| FBgn0030737 | CG9914       | -2.59245931  | 0.024375098 | CG9914    |
| FBgn0030743 | CG9921       | -1.337958627 | 0.034444004 | CG9921    |
| FBgn0039593 | CG9989       | 1.792893952  | 0.047222182 | CG9989    |
| FBgn0039594 | CG9990       | 1.613719746  | 0.010584439 | CG9990    |
| FBgn0000337 | cn           | 1.70028799   | 0.032111663 | CG1555    |
| FBgn0261612 | Cng          | 1.663705601  | 0.006824019 | CG42701   |
| FBgn0021944 | CoproX       | 1.503162066  | 0.030934637 | CG3433    |
| FBgn0033192 | Corin        | 1.919774232  | 0.015417857 | CG2105    |
| FBgn0259173 | corn         | 2.168697344  | 0.031189791 | CG42278   |
| FBgn0033728 | Cpr49Ae      | -3.75837877  | 0.002860523 | CG8505    |
| FBgn0050055 | CR30055      | -1.533275002 | 0.034343962 | CR30055   |
| FBgn0037309 | CR31541      | 7.89231935   | 0.001058882 | CR31541   |
| FBgn0262107 | CR42860      | 1.433542213  | 0.014588302 | CR42860   |
| FBgn0004396 | CrebA        | 1.712585468  | 0.018263574 | CG7450    |
| FBgn0259938 | cwo          | 1.654607302  | 0.043481198 | CG17100   |
| FBgn0038095 | Cyp304a1     | 4.068321541  | 0.034044323 | CG7241    |
| FBgn0037601 | Cyp313b1     | 2.567418072  | 0.00020794  | CG9716    |
| FBgn0030304 | Cyp4g15      | 1.632810261  | 0.004012324 | CG11715   |
| FBgn0000473 | Cyp6a2       | 2.243630581  | 0.041708203 | CG9438    |
| FBgn0031182 | Cyp6t1       | -1.628650702 | 0.022124784 | CG1644    |
| FBgn0033697 | Cyp6t3       | 1.600657179  | 0.015415474 | CG8457    |
| FBgn0033659 | Damm         | 3.400476653  | 0.027952056 | CG18188   |
| FBgn0010220 | Dbp45A       | 1.423532993  | 0.024264746 | CG12759   |
| FBgn0262656 | dm           | 1.615247967  | 0.006245791 | CG10798   |
| FBgn0035331 | DmsR-1       | 1.448336867  | 0.038111743 | CG8985    |
| FBgn0000492 | Dr           | 1.999485796  | 0.038076987 | CG1897    |
| FBgn0052282 | dro4         | -1.581566195 | 0.027323718 | CG32282   |
| FBgn0000557 | Ef1alpha100f | 1.627887955  | 0.005441144 | CG1873    |
| FBgn0033540 | Elp2         | 1.483550045  | 0.030028733 | CG11887   |
| FBgn0261274 | Ero1L        | 1.518027717  | 0.032579879 | CG1333    |
| FBgn0030092 | fh           | -2.002376493 | 0.023145498 | CG8971    |
| FBgn0053556 | form3        | 1.523528895  | 0.018729713 | CG33556   |
| FBgn0025373 | Fpps         | 2.779605549  | 7.85991E-05 | CG12389   |
| FBgn0026718 | fu12         | -1.410441879 | 0.029860954 | CG17608   |
| FBgn0028433 | Ggamma30A    | -1.56175301  | 0.011666776 | Ggamma30A |
| FBgn0024963 | GluClalpha   | -1.926791566 | 0.033927781 | CG7535    |
| FBgn0020429 | GluRIIB      | 1.588526087  | 0.023422729 | CG7234    |
| FBgn0046113 | GluRIIC      | 1.316693382  | 0.043280331 | CG4226    |
| FBgn0051201 | GluRIIE      | 1.821434576  | 0.002159246 | CG31201   |
| FBgn0015230 | Glut3        | 21.08721137  | 0.014179048 | CG3853    |
| FBgn0029830 | Grip         | 1.342582187  | 0.027578947 | CG14447   |
| FBgn0016660 | H15          | -1.521081696 | 0.031836444 | CG6604    |
| FBgn0001234 | Hsromega     | -1.657649563 | 0.011466171 | CR31400   |
| FBgn0014906 | Hydr2        | -1.39793477  | 0.02411559  | CG3488    |
| FBgn0028428 | lh           | 1.440405836  | 0.021163128 | lh        |
| FBgn0044047 | Ilp6         | 2.461373332  | 0.001607948 | CG14049   |
| FBgn0001258 | ImpL3        | 8.68216235   | 5.34902E-06 | CG10160   |
| FBgn0011603 | ine          | 1.749045974  | 0.004703017 | CG15444   |
| FBgn0086359 | Invadolysin  | -1.57021361  | 0.008288188 | CG3953    |
| FBgn0010053 | Jheh1        | -1.460195655 | 0.010029836 | CG15101   |
| FBgn0053182 | Kdm4B        | 1.868298405  | 0.012705978 | CG33182   |
| FBgn0001301 | kel          | -1.506708733 | 0.015642246 | CG7210    |
| FBgn0026666 | l(1)G0136    | -1.386801098 | 0.017267139 | CG8198    |
| FBgn0261534 | l(2)34Fc     | -1.470515489 | 0.007686808 | CG7532    |
| FBgn0086447 | l(2)37Cg     | 1.383628975  | 0.021329137 | CG10685   |
| FBgn0002526 | LanA         | 1.497798338  | 0.041803047 | CG10236   |
| FBgn0025687 | LKR          | 1.714891799  | 0.009843941 | CG7144    |
| FBgn0002563 | Lsp1beta     | -2.759721712 | 0.049364115 | CG4178    |
| FBgn0026207 | mbo          | -1.377976388 | 0.033210474 | CG6819    |
| FBgn0002772 | Mlc1         | -1.346548245 | 0.014906467 | CG5596    |
| FBgn0035335 | mRpL23       | -1.409467662 | 0.0188404   | CG1320    |
| FBgn0030686 | mRpL3        | -1.456191254 | 0.020868669 | CG8288    |
| FBgn0038923 | mRpL35       | -1.2753666   | 0.038458368 | CG13410   |
| FBgn0044030 | mRpS14       | -1.492330346 | 0.030546511 | CG32531   |
| FBgn0039159 | mRpS24       | -1.328526498 | 0.044140467 | CG13608   |
| FBgn0053548 | msta         | -2.630372867 | 0.004623744 | CG33548   |
| FBgn0038818 | Nep4         | -1.681996029 | 0.029766105 | CG4058    |
| FBgn0005771 | noc          | 1.719101203  | 0.014703202 | CG4491    |
| FBgn0026197 | noe          | 1.541303695  | 0.026389232 | CG32172   |
| FBgn0040717 | Nplp4        | -3.072329906 | 0.001220159 | CG15361   |
| FBgn0015777 | nrv2         | -1.429614263 | 0.00907558  | CG9261    |
| FBgn0032946 | nrv3         | 1.510425912  | 0.029667713 | CG8663    |

|             |              |              |             |         |
|-------------|--------------|--------------|-------------|---------|
| FBgn0046878 | Obp83cd      | 2.101694497  | 0.041709639 | CG15582 |
| FBgn0046876 | Obp83ef      | 1.953507422  | 0.0132833   | CG31557 |
| FBgn0039678 | Obp99a       | -2.78934003  | 0.009981159 | CG18111 |
| FBgn0050443 | Opbp         | 1.316111095  | 0.041320371 | CG30443 |
| FBgn0037424 | Osi15        | 2.667516517  | 0.026776277 | CG1157  |
| FBgn0035101 | p130CAS      | -1.550090387 | 0.045887471 | CG1212  |
| FBgn0037138 | P5CDh1       | -1.464236058 | 0.02689844  | CG7145  |
| FBgn0262728 | Pal2         | 1.427757744  | 0.041573026 | CG5472  |
| FBgn0035977 | PGRP-LF      | 1.782697709  | 0.027623916 | CG4437  |
| FBgn0039776 | PH4alphaEFB  | 2.093525668  | 0.001191873 | CG31022 |
| FBgn0261015 | Pif1A        | 1.257987724  | 0.046170119 | CG42599 |
| FBgn0038201 | Pk1r         | 2.415446812  | 0.010562075 | CG9918  |
| FBgn0005626 | ple          | 2.439671575  | 0.033962481 | CG10118 |
| FBgn0003118 | pnt          | 1.495674072  | 0.037437305 | CG17077 |
| FBgn0002284 | Pros26       | -1.254114334 | 0.045607196 | CG4097  |
| FBgn0023175 | Prosalpha7   | -1.316327643 | 0.044480107 | CG1519  |
| FBgn0029134 | Prosbeta5    | -1.312179137 | 0.028402987 | CG12323 |
| FBgn0085407 | Pvf3         | 1.486178488  | 0.045441332 | CG34378 |
| FBgn0035113 | pyx          | 1.477823634  | 0.023161996 | CG17142 |
| FBgn0031882 | Rab30        | 3.392068054  | 0.000989795 | CG9100  |
| FBgn0050296 | RIC-3        | -1.354193401 | 0.0135626   | CG30296 |
| FBgn0051719 | RluA-1       | -1.291118691 | 0.041283797 | CG31719 |
| FBgn0003278 | Rpl135       | 1.510379026  | 0.042956622 | CG4033  |
| FBgn0037742 | Rpt3R        | -1.61071838  | 0.016894708 | CG9475  |
| FBgn0039788 | Rpt6R        | 1.969974172  | 0.018599491 | CG2241  |
| FBgn0260648 | Rrp40        | 1.461924765  | 0.008845633 | CG31938 |
| FBgn0037815 | Rrp46        | 1.622129984  | 0.007858871 | CG4043  |
| FBgn0015806 | S6k          | 1.299114013  | 0.042767625 | CG10539 |
| FBgn0032330 | Samuel       | 1.45882896   | 0.022020332 | CG31868 |
| FBgn0028991 | seq          | 1.793506163  | 0.014227396 | CG32904 |
| FBgn0003390 | shf          | 1.84271608   | 0.009034923 | CG3135  |
| FBgn0029761 | SK           | -1.410473698 | 0.031899565 | CG10706 |
| FBgn0051133 | Slimp        | -1.546576052 | 0.048159817 | CG31133 |
| FBgn0038257 | smp-30       | -2.352175241 | 0.00122931  | CG7390  |
| FBgn0065096 | snmRNA:359   | -1.271504701 | 0.040214712 | CR33712 |
| FBgn0065092 | snmRNA:438   | 1.566039928  | 0.005197491 | CR33660 |
| FBgn0065064 | sRNA:Psi28S- | 1.694761778  | 0.016852893 | CR33754 |
| FBgn0003460 | so           | -1.411709482 | 0.023746117 | CG11121 |
| FBgn0010213 | Sod2         | -1.329871271 | 0.035342974 | CG8905  |
| FBgn0032178 | Spn31A       | -1.299449906 | 0.036299581 | CG4804  |
| FBgn0003482 | spn-D        | -1.958190473 | 0.047381306 | CG31069 |
| FBgn0032362 | spz4         | 1.639752543  | 0.013572851 | CG14928 |
| FBgn0014388 | sty          | 1.485862395  | 0.037946648 | CG1921  |
| FBgn0086450 | su(r)        | 1.432408046  | 0.040296735 | CG2194  |
| FBgn0008654 | Su(z)2       | 1.553840819  | 0.034698271 | Su(z)2  |
| FBgn0028675 | Sur          | -1.574521729 | 0.004548246 | CG5772  |
| FBgn0003651 | svp          | 1.748106775  | 0.043460383 | CG11502 |
| FBgn0004359 | T48          | -1.335552473 | 0.029942354 | CG5507  |
| FBgn0014396 | tim          | 2.430699823  | 0.028751114 | CG3234  |
| FBgn0035083 | Tina-1       | 1.351826728  | 0.02002427  | CG2803  |
| FBgn0003716 | tkv          | 1.353983068  | 0.049441966 | CG14026 |
| FBgn0039257 | tnc          | -1.878529407 | 0.04168883  | CG13648 |
| FBgn0261575 | tobi         | -2.268202852 | 0.013573012 | CG11909 |
| FBgn0004885 | tok          | 1.385580401  | 0.027041434 | CG6863  |
| FBgn0003733 | tor          | -1.481712751 | 0.044016671 | CG1389  |
| FBgn0044812 | TotC         | 3.510160586  | 0.023104864 | CG31508 |
| FBgn0031701 | TotM         | 7.860207977  | 0.002409092 | CG14027 |
| FBgn0031692 | TpnC25D      | -1.402656865 | 0.016139137 | CG6514  |
| FBgn0032586 | Tpr2         | 1.667655775  | 0.001350555 | CG4599  |
| FBgn0262139 | trh          | 2.124076718  | 0.003437776 | CG42865 |
| FBgn0013263 | Trl          | 1.315148843  | 0.031737137 | CG33261 |
| FBgn0033135 | Tsp42En      | 1.867657966  | 0.005290482 | CG12839 |
| FBgn0010473 | tutl         | -1.82116718  | 0.045333229 | CG15427 |
| FBgn0045800 | Uhg1         | 1.448493885  | 0.039573912 | CR32886 |
| FBgn0083123 | Uhg5         | 1.419159542  | 0.038637861 | CR42452 |
| FBgn0040068 | vav          | 1.930569798  | 0.002050116 | CG7893  |
| FBgn0041174 | Vhl          | 1.963058899  | 0.001468923 | CG13221 |
| FBgn0016075 | vkg          | 1.531824858  | 0.019652073 | CG16858 |
| FBgn0261563 | wb           | 1.624693324  | 0.037929744 | CG42677 |
| FBgn0037750 | Whamy        | 2.269574623  | 0.006967262 | CG12946 |
| FBgn0004606 | zfh1         | 1.610535421  | 0.036631652 | CG1322  |
| FBgn0035432 | ZnT63C       | 1.537713237  | 0.042940831 | CG17723 |



### Supplemental Table 3. Complete List of Genes depicted in Comparative Venn Analysis of Cardiac Gene Expression between Hypoxia-Selected (HS) flies and flies exposed to Chronic Hypoxia (CH) in Figure 2

| 420 - Select UP | 557-Select Down | 230-Chronic Up | 339- Chronic Down | 22- BOTH UP | 22- BOTH CONTRA | 50- BOTH DOWN |
|-----------------|-----------------|----------------|-------------------|-------------|-----------------|---------------|
| FBgn0036342     | FBgn0030758     | FBgn0033087    | FBgn0263002       | FBgn0051051 | FBgn0039419     | FBgn0037963   |
| FBgn0028292     | FBgn0042201     | FBgn0037933    | FBgn0040743       | FBgn0039930 | FBgn0052369     | FBgn0051719   |
| FBgn0040606     | FBgn0036094     | FBgn0016797    | FBgn0050060       | FBgn0031327 | FBgn0038079     | FBgn0043792   |
| FBgn0032453     | FBgn0030388     | FBgn0036834    | FBgn0086661       | FBgn0035982 | FBgn0011603     | FBgn0033728   |
| FBgn0037609     | FBgn0001229     | FBgn0037305    | FBgn0038484       | FBgn0041174 | FBgn0259735     | FBgn0037895   |
| FBgn0014851     | FBgn0050121     | FBgn0019947    | FBgn0085209       | FBgn0046876 | FBgn0051032     | FBgn0037288   |
| FBgn0266711     | FBgn0035049     | FBgn0032919    | FBgn0264721       | FBgn0085359 | FBgn0001168     | FBgn0000667   |
| FBgn0259237     | FBgn0261283     | FBgn0028372    | FBgn0263650       | FBgn0023525 | FBgn0035144     | FBgn0031855   |
| FBgn0058195     | FBgn0262476     | FBgn0000239    | FBgn0033268       | FBgn0053082 | FBgn0014396     | FBgn0037138   |
| FBgn0028880     | FBgn0050095     | FBgn0030342    | FBgn0039420       | FBgn0036589 | FBgn0035432     | FBgn0014906   |
| FBgn0051777     | FBgn0038419     | FBgn0041210    | FBgn0039678       | FBgn0030884 | FBgn0052103     | FBgn0027085   |
| FBgn0025709     | FBgn0261723     | FBgn0036030    | FBgn0051845       | FBgn0261612 | FBgn0262506     | FBgn0033872   |
| FBgn0259482     | FBgn0033927     | FBgn0030411    | FBgn0033464       | FBgn0038173 | FBgn0261859     | FBgn0033917   |
| FBgn0085587     | FBgn0035317     | FBgn0264672    | FBgn0032266       | FBgn0000557 | FBgn0033135     | FBgn0014141   |
| FBgn0030306     | FBgn0033153     | FBgn0026060    | FBgn0032225       | FBgn0039620 | FBgn0004368     | FBgn00002787  |
| FBgn0052068     | FBgn0000527     | FBgn0029992    | FBgn0002563       | FBgn0038761 | FBgn0085325     | FBgn0262599   |
| FBgn0039197     | FBgn0260632     | FBgn0030630    | FBgn0038819       | FBgn0030304 | FBgn0035169     | FBgn0051103   |
| FBgn0017457     | FBgn0005660     | FBgn0037882    | FBgn0030881       | FBgn0031630 | FBgn0010053     | FBgn0033204   |
| FBgn0036789     | FBgn0040507     | FBgn0010292    | FBgn0040717       | FBgn0037601 | FBgn0026563     | FBgn0034909   |
| FBgn0028946     | FBgn0036419     | FBgn0021874    | FBgn0038083       | FBgn0040531 | FBgn0043806     | FBgn0259822   |
| FBgn0034924     | FBgn0024897     | FBgn0051146    | FBgn0261575       | FBgn0052695 | FBgn0026718     | FBgn0039040   |
| FBgn0003444     | FBgn0039805     | FBgn0034002    | FBgn0051821       | FBgn0031701 | FBgn0040503     | FBgn0025712   |
| FBgn0264979     | FBgn0086365     | FBgn0036819    | FBgn0038257       |             |                 | FBgn0035039   |
| FBgn0058275     | FBgn0034639     | FBgn0038146    | FBgn0034454       |             |                 | FBgn0051159   |
| FBgn0261803     | FBgn0053192     | FBgn0039006    | FBgn0051823       |             |                 | FBgn0028692   |
| FBgn0030327     | FBgn0037222     | FBgn0030611    | FBgn0037997       |             |                 | FBgn0035146   |
| FBgn0053923     | FBgn0260011     | FBgn0036147    | FBgn0037615       |             |                 | FBgn0000046   |
| FBgn0025820     | FBgn0010246     | FBgn0051072    | FBgn0039232       |             |                 | FBgn0028563   |
| FBgn0021795     | FBgn0039770     | FBgn0010389    | FBgn0034497       |             |                 | FBgn0053548   |
| FBgn0267430     | FBgn0034225     | FBgn0038744    | FBgn0039257       |             |                 | FBgn0032216   |
| FBgn0035078     | FBgn0004620     | FBgn0025366    | FBgn0038437       |             |                 | FBgn0015777   |
| FBgn0004644     | FBgn0264495     | FBgn0015513    | FBgn0038202       |             |                 | FBgn0026602   |
| FBgn0024509     | FBgn0260749     | FBgn0028382    | FBgn0085356       |             |                 | FBgn0039667   |
| FBgn0039596     | FBgn0044826     | FBgn0032429    | FBgn0035813       |             |                 | FBgn0032195   |
| FBgn0029727     | FBgn0039444     | FBgn0086690    | FBgn0035578       |             |                 | FBgn0000116   |
| FBgn0004797     | FBgn0262717     | FBgn0024986    | FBgn0035948       |             |                 | FBgn0025627   |
| FBgn0033205     | FBgn0260795     | FBgn0011764    | FBgn0013972       |             |                 | FBgn0033989   |
| FBgn0023542     | FBgn0015323     | FBgn0030797    | FBgn0036259       |             |                 | FBgn0028688   |
| FBgn0052160     | FBgn0036273     | FBgn0025571    | FBgn0052203       |             |                 | FBgn0005666   |
| FBgn0052641     | FBgn0014011     | FBgn0031048    | FBgn0034247       |             |                 | FBgn0031037   |
| FBgn0051789     | FBgn0026268     | FBgn0021800    | FBgn0034670       |             |                 | FBgn0085307   |
| FBgn0033019     | FBgn0053998     | FBgn0032845    | FBgn0001228       |             |                 | FBgn0028686   |
| FBgn0260006     | FBgn0036377     | FBgn0000396    | FBgn0010014       |             |                 | FBgn0030686   |
| FBgn0050424     | FBgn0260653     | FBgn0032701    | FBgn0033981       |             |                 | FBgn0034362   |
| FBgn0036463     | FBgn0003159     | FBgn0021995    | FBgn0040650       |             |                 | FBgn0250874   |
| FBgn0037084     | FBgn0023526     | FBgn0024555    | FBgn0051321       |             |                 | FBgn0032445   |
| FBgn0038876     | FBgn0086758     | FBgn0030834    | FBgn0035192       |             |                 | FBgn0039637   |
| FBgn0032350     | FBgn0004587     | FBgn0261555    | FBgn0034758       |             |                 | FBgn0032494   |
| FBgn0051548     | FBgn0010241     | FBgn0035084    | FBgn0039094       |             |                 | FBgn0023174   |
| FBgn0034162     | FBgn0265186     | FBgn0263510    | FBgn0037290       |             |                 | FBgn0028691   |
| FBgn0030575     | FBgn0033388     | FBgn0039627    | FBgn0033224       |             |                 |               |
| FBgn0085308     | FBgn0085443     | FBgn0013263    | FBgn0264327       |             |                 |               |
| FBgn0041630     | FBgn0031306     | FBgn0033095    | FBgn0037386       |             |                 |               |
| FBgn0033624     | FBgn0027548     | FBgn0044020    | FBgn0029728       |             |                 |               |
| FBgn0053054     | FBgn0001112     | FBgn0030574    | FBgn0038774       |             |                 |               |
| FBgn0040827     | FBgn0003328     | FBgn0015806    | FBgn0085474       |             |                 |               |
| FBgn0029828     | FBgn0034381     | FBgn0029885    | FBgn0037742       |             |                 |               |
| FBgn0034430     | FBgn0001297     | FBgn0031356    | FBgn0051810       |             |                 |               |
| FBgn0020643     | FBgn0034253     | FBgn0031678    | FBgn0263847       |             |                 |               |
| FBgn0037354     | FBgn0004635     | FBgn0031657    | FBgn0262102       |             |                 |               |
| FBgn0033101     | FBgn0033649     | FBgn0003716    | FBgn0036629       |             |                 |               |
| FBgn0034795     | FBgn0032587     | FBgn0086447    | FBgn0038818       |             |                 |               |
| FBgn0030027     | FBgn0027790     | FBgn0020493    | FBgn0031182       |             |                 |               |
| FBgn0013732     | FBgn0086708     | FBgn0035702    | FBgn0004569       |             |                 |               |
| FBgn0052579     | FBgn0038733     | FBgn0050443    | FBgn0010473       |             |                 |               |
| FBgn0023395     | FBgn0030483     | FBgn0020909    | FBgn0000153       |             |                 |               |
| FBgn0030528     | FBgn0035379     | FBgn0036152    | FBgn0262539       |             |                 |               |
| FBgn0037875     | FBgn0030831     | FBgn0250868    | FBgn0259219       |             |                 |               |
| FBgn0030590     | FBgn0036881     | FBgn0030343    | FBgn0038621       |             |                 |               |
| FBgn0003145     | FBgn0035427     | FBgn0035704    | FBgn0040972       |             |                 |               |

FBgn0024994 FBgn00262733 FBgn0035083 FBgn0051450  
FBgn0030425 FBgn0052183 FBgn0032512 FBgn0043783  
FBgn0033081 FBgn0038959 FBgn0053987 FBgn0030092  
FBgn0086677 FBgn0260945 FBgn0029830 FBgn0051674  
FBgn0037419 FBgn0035434 FBgn0030716 FBgn0028931  
FBgn0040487 FBgn0266452 FBgn0031883 FBgn0051133  
FBgn0038321 FBgn0035205 FBgn0039218 FBgn0086359  
FBgn0005626 FBgn0264442 FBgn0260942 FBgn0001301  
FBgn0002775 FBgn0039686 FBgn0034691 FBgn0037330  
FBgn0263116 FBgn0031758 FBgn0039306 FBgn0050178  
FBgn0038198 FBgn0035544 FBgn0034997 FBgn0033257  
FBgn0020385 FBgn0013279 FBgn0023214 FBgn0040993  
FBgn0032132 FBgn0033518 FBgn0028979 FBgn0032849  
FBgn0051465 FBgn0032981 FBgn0027453 FBgn0034485  
FBgn0030394 FBgn0033391 FBgn0038735 FBgn0036479  
FBgn0031417 FBgn0038638 FBgn0019948 FBgn0035309  
FBgn0052278 FBgn0036116 FBgn0010220 FBgn0261534  
FBgn0040559 FBgn0264090 FBgn0030878 FBgn0033085  
FBgn0086371 FBgn0014863 FBgn0051997 FBgn0052082  
FBgn0036277 FBgn0085246 FBgn0052529 FBgn0016660  
FBgn0051075 FBgn0267487 FBgn0262728 FBgn0034644  
FBgn0058359 FBgn0085261 FBgn0035689 FBgn0039932  
FBgn0035166 FBgn0033177 FBgn0026088 FBgn0033274  
FBgn0036150 FBgn0027341 FBgn0027585 FBgn0028675  
FBgn0047135 FBgn0026582 FBgn0021875 FBgn0052282  
FBgn0033466 FBgn0024277 FBgn0004885 FBgn0001234  
FBgn0259745 FBgn0045442 FBgn0033661 FBgn0003733  
FBgn0004629 FBgn0032699 FBgn0039000 FBgn0040634  
FBgn0032015 FBgn0034903 FBgn0035888 FBgn0058298  
FBgn0034202 FBgn0262636 FBgn0032298 FBgn0050055  
FBgn0033247 FBgn0034406 FBgn0027654 FBgn0035355  
FBgn0038803 FBgn0035159 FBgn0033540 FBgn0001992  
FBgn0053194 FBgn0035627 FBgn0032079 FBgn0033734  
FBgn0037127 FBgn0026015 FBgn0020762 FBgn0050196  
FBgn0029929 FBgn0033928 FBgn0035158 FBgn0037923  
FBgn0035091 FBgn0259187 FBgn0263029 FBgn0085201  
FBgn0003300 FBgn0260943 FBgn0029525 FBgn0034564  
FBgn0037678 FBgn0053523 FBgn0083123 FBgn0039159  
FBgn0037000 FBgn0259108 FBgn0038597 FBgn0044030  
FBgn0085290 FBgn0051140 FBgn0031008 FBgn0264437  
FBgn0032231 FBgn0266429 FBgn0037815 FBgn0000635  
FBgn0027951 FBgn0260744 FBgn0031970 FBgn0030883  
FBgn0263077 FBgn0263354 FBgn0014388 FBgn0044823  
FBgn0034198 FBgn0053110 FBgn0000395 FBgn0030270  
FBgn0016131 FBgn0039495 FBgn0030334 FBgn0026315  
FBgn0031974 FBgn0033926 FBgn0039829 FBgn0038072  
FBgn0050096 FBgn0036659 FBgn0026079 FBgn0034965  
FBgn0034761 FBgn0259481 FBgn0031939 FBgn0032857  
FBgn0052383 FBgn0259164 FBgn0261274 FBgn0033633  
FBgn0050010 FBgn0032116 FBgn0030676 FBgn0035402  
FBgn0029709 FBgn0039759 FBgn0031474 FBgn0031908  
FBgn0036337 FBgn0035829 FBgn0052170 FBgn0003231  
FBgn0037298 FBgn0001226 FBgn0032717 FBgn0026207  
FBgn0046692 FBgn0000256 FBgn0008654 FBgn0031692  
FBgn0031563 FBgn0267795 FBgn0034010 FBgn0038977  
FBgn0034489 FBgn0024997 FBgn0260648 FBgn0004359  
FBgn0052570 FBgn0051200 FBgn0021944 FBgn0001217  
FBgn0003867 FBgn0034697 FBgn0051675 FBgn0032644  
FBgn0250820 FBgn0033448 FBgn0053556 FBgn0026261  
FBgn0250907 FBgn0038475 FBgn0003278 FBgn0039742  
FBgn0024980 FBgn0264894 FBgn0032330 FBgn0050104  
FBgn0033799 FBgn0086347 FBgn0036145 FBgn0003460  
FBgn0003312 FBgn0035170 FBgn0039356 FBgn0085484  
FBgn0004055 FBgn0005561 FBgn0003888 FBgn0035335  
FBgn0029823 FBgn0046875 FBgn0034706 FBgn0262567  
FBgn0035187 FBgn0036688 FBgn0003137 FBgn0010395  
FBgn0035392 FBgn0014018 FBgn0002526 FBgn0052100  
FBgn0033835 FBgn0010397 FBgn0050187 FBgn0028433  
FBgn0036105 FBgn0001321 FBgn0016075 FBgn0026666  
FBgn0038771 FBgn0003089 FBgn0003118 FBgn0034655  
FBgn0034539 FBgn0051973 FBgn0020429 FBgn0250843

FBgn0034423 FBgn00263132 FBgn0052687 FBgn0016697  
FBgn0026737 FBgn0085438 FBgn0061361 FBgn0037841  
FBgn0003116 FBgn0022772 FBgn00260026 FBgn0038975  
FBgn0040733 FBgn0010620 FBgn0039161 FBgn0035344  
FBgn0030592 FBgn0036772 FBgn0036770 FBgn0035232  
FBgn0259697 FBgn0032139 FBgn0036316 FBgn0038961  
FBgn0061492 FBgn0039897 FBgn0003651 FBgn0260779  
FBgn0014000 FBgn0011224 FBgn0052512 FBgn0030743  
FBgn0066293 FBgn0243512 FBgn0028420 FBgn0031835  
FBgn0036586 FBgn0013278 FBgn0261563 FBgn0033480  
FBgn0030737 FBgn0032684 FBgn0027550 FBgn0039145  
FBgn0040491 FBgn0262866 FBgn0039594 FBgn0001216  
FBgn0037684 FBgn0264848 FBgn0033913 FBgn0035122  
FBgn0037850 FBgn0004512 FBgn0004606 FBgn0038923  
FBgn0034331 FBgn0051064 FBgn0000299 FBgn0011296  
FBgn0263256 FBgn0086906 FBgn0037796 FBgn0050106  
FBgn0037013 FBgn0036101 FBgn0039527 FBgn0033652  
FBgn0058138 FBgn0024963 FBgn0262656 FBgn0036570  
FBgn0036820 FBgn0022770 FBgn0000337 FBgn0015283  
FBgn0030775 FBgn0038695 FBgn0036684 FBgn0050296  
FBgn0038742 FBgn0036880 FBgn0032900 FBgn0037822  
FBgn0031049 FBgn0040281 FBgn0259938 FBgn0002772  
FBgn0031694 FBgn0259937 FBgn0030520 FBgn0023129  
FBgn0265276 FBgn0053299 FBgn0005771 FBgn0037433  
FBgn0037801 FBgn0037709 FBgn0028991 FBgn0029665  
FBgn0030925 FBgn0033698 FBgn0032586 FBgn0085271  
FBgn0263143 FBgn0004880 FBgn0033697 FBgn0030692  
FBgn0036992 FBgn0015376 FBgn0025687 FBgn0037835  
FBgn0028499 FBgn0038752 FBgn0052373 FBgn0032400  
FBgn0023535 FBgn0035345 FBgn0004396 FBgn0004066  
FBgn0036459 FBgn0032895 FBgn0038365 FBgn0038610  
FBgn0037420 FBgn0050163 FBgn0259236 FBgn0036763  
FBgn0051683 FBgn0011828 FBgn0020766 FBgn0036454  
FBgn0033320 FBgn0259730 FBgn0027793 FBgn0038839  
FBgn0040373 FBgn0265003 FBgn0082962 FBgn0026741  
FBgn0038172 FBgn0028962 FBgn0003390 FBgn0023175  
FBgn0031561 FBgn0026086 FBgn0036240 FBgn0032922  
FBgn0035401 FBgn0033110 FBgn0065064 FBgn0037481  
FBgn0040364 FBgn0010452 FBgn0039788 FBgn0032798  
FBgn0031268 FBgn0039266 FBgn0085427 FBgn0039741  
FBgn0004777 FBgn0031973 FBgn0053182 FBgn0029134  
FBgn0002645 FBgn0041243 FBgn0035977 FBgn0039861  
FBgn0030122 FBgn0051219 FBgn0000492 FBgn0051122  
FBgn0033945 FBgn0039323 FBgn0051201 FBgn0011476  
FBgn0058191 FBgn0086443 FBgn0053460 FBgn0010213  
FBgn0038105 FBgn0005586 FBgn0035113 FBgn0037619  
FBgn0027334 FBgn0037730 FBgn0040736 FBgn0039207  
FBgn0085413 FBgn0067102 FBgn0037385 FBgn0032178  
FBgn0051720 FBgn0036333 FBgn0051259 FBgn0034733  
FBgn0030665 FBgn0038958 FBgn0035452 FBgn0035624  
FBgn0053276 FBgn0038201 FBgn0039747 FBgn0032935  
FBgn0036157 FBgn0033654 FBgn0029791 FBgn0040259  
FBgn0013773 FBgn0016081 FBgn0264652 FBgn0036987  
FBgn0036549 FBgn0063649 FBgn0085409 FBgn0033961  
FBgn0052694 FBgn0003149 FBgn0262139 FBgn0026324  
FBgn0031766 FBgn0034005 FBgn0033192 FBgn0016691  
FBgn0264325 FBgn0029720 FBgn0053260 FBgn0035805  
FBgn0030307 FBgn0039896 FBgn0262107 FBgn0037102  
FBgn0032281 FBgn0031950 FBgn0027360 FBgn0034382  
FBgn0002863 FBgn0033889 FBgn0052055 FBgn0036028  
FBgn0032084 FBgn0011695 FBgn0039776 FBgn0031247  
FBgn0003248 FBgn0034517 FBgn0046878 FBgn0039339  
FBgn0063485 FBgn0027561 FBgn0040068 FBgn0263697  
FBgn0033000 FBgn0026404 FBgn0261611 FBgn0030786  
FBgn0034726 FBgn0001224 FBgn0082995 FBgn0033816  
FBgn0052398 FBgn0038721 FBgn0013342 FBgn0017567  
FBgn0036271 FBgn0043854 FBgn0036939 FBgn0085475  
FBgn0036126 FBgn0024273 FBgn0032283 FBgn0037515  
FBgn0039855 FBgn0013563 FBgn0034145 FBgn0038922  
FBgn0033821 FBgn0034281 FBgn0259173 FBgn0023540  
FBgn0039915 FBgn0035501 FBgn0044047 FBgn0003721

|             |             |             |             |
|-------------|-------------|-------------|-------------|
| FBgn0032896 | FBgn0031688 | FBgn0025373 | FBgn0039835 |
| FBgn0030026 | FBgn0031302 | FBgn0032685 | FBgn0035942 |
| FBgn0083945 | FBgn0033129 | FBgn0014135 | FBgn0261394 |
| FBgn0039629 | FBgn0001230 | FBgn0083015 | FBgn0032884 |
| FBgn0034512 | FBgn0034486 | FBgn0083039 | FBgn0038816 |
| FBgn0031460 | FBgn0040496 | FBgn0031971 | FBgn0035851 |
| FBgn0035859 | FBgn0040297 | FBgn0031882 | FBgn0040899 |
| FBgn0025583 | FBgn0036278 | FBgn0263586 | FBgn0030554 |
| FBgn0032076 | FBgn0010786 | FBgn0033830 | FBgn0040271 |
| FBgn0011740 | FBgn0015372 | FBgn0033802 | FBgn0027583 |
| FBgn0243511 | FBgn0052311 | FBgn0030826 | FBgn0039588 |
| FBgn0087021 | FBgn0085412 | FBgn0086603 | FBgn0029858 |
| FBgn0036847 | FBgn0003513 | FBgn0086660 | FBgn0037607 |
| FBgn0261990 | FBgn0266268 | FBgn0082987 | FBgn0034027 |
| FBgn0034365 | FBgn0035315 | FBgn0037309 | FBgn0004110 |
| FBgn0085253 | FBgn0037275 | FBgn0033763 | FBgn0015282 |
| FBgn0036492 | FBgn0036324 | FBgn0001258 | FBgn0010590 |
| FBgn0032287 | FBgn0039831 | FBgn0031307 | FBgn0035517 |
| FBgn0014455 | FBgn0022787 |             | FBgn0028693 |
| FBgn0038512 | FBgn0016650 |             | FBgn0015577 |
| FBgn0039690 | FBgn0038730 |             | FBgn0034919 |
| FBgn0050503 | FBgn0031450 |             | FBgn0036726 |
| FBgn0037973 | FBgn0266719 |             | FBgn0033179 |
| FBgn0052845 | FBgn0032260 |             | FBgn0030360 |
| FBgn0030078 | FBgn0027660 |             | FBgn0034923 |
| FBgn0011802 | FBgn0041150 |             | FBgn0035241 |
| FBgn0019932 | FBgn0034177 |             | FBgn0039914 |
| FBgn0038858 | FBgn0001291 |             | FBgn0004903 |
| FBgn0033760 | FBgn0020620 |             | FBgn0031286 |
| FBgn0030272 | FBgn0266566 |             | FBgn0002284 |
| FBgn0001323 | FBgn0036207 |             | FBgn0062442 |
| FBgn0002577 | FBgn0034401 |             | FBgn0001991 |
| FBgn0030073 | FBgn0264953 |             | FBgn0029801 |
| FBgn0030351 | FBgn0041582 |             | FBgn0085257 |
| FBgn0020622 | FBgn0040475 |             | FBgn0030679 |
| FBgn0004811 | FBgn0004507 |             | FBgn0032222 |
| FBgn0054003 | FBgn0262169 |             | FBgn0035708 |
| FBgn0020513 | FBgn0033970 |             | FBgn0016038 |
| FBgn0030060 | FBgn0031888 |             | FBgn0034310 |
| FBgn0051084 | FBgn0035767 |             | FBgn0260857 |
| FBgn0001089 | FBgn0032470 |             | FBgn0026380 |
| FBgn0028988 | FBgn0035830 |             | FBgn0261396 |
| FBgn0038878 | FBgn0261938 |             | FBgn0035679 |
| FBgn0000233 | FBgn0034989 |             | FBgn0039259 |
| FBgn0015714 | FBgn0037238 |             | FBgn0032290 |
| FBgn0034507 | FBgn0020647 |             | FBgn0029529 |
| FBgn0038302 | FBgn0038376 |             | FBgn0033208 |
| FBgn0035085 | FBgn0030562 |             | FBgn0004363 |
| FBgn0261797 | FBgn0016693 |             | FBgn0032511 |
| FBgn0033366 | FBgn0033723 |             | FBgn0039223 |
| FBgn0032020 | FBgn0039007 |             | FBgn0035981 |
| FBgn0037230 | FBgn0033484 |             | FBgn0002773 |
| FBgn0031560 | FBgn0261260 |             | FBgn0024985 |
| FBgn0029804 | FBgn0261811 |             | FBgn0033100 |
| FBgn0259716 | FBgn0263456 |             | FBgn0264489 |
| FBgn0039118 | FBgn0032911 |             | FBgn0032031 |
| FBgn0058088 | FBgn0001083 |             | FBgn0020369 |
| FBgn0035131 | FBgn0034543 |             | FBgn0039881 |
| FBgn0035076 | FBgn0052677 |             | FBgn0028695 |
| FBgn0037885 | FBgn0014380 |             | FBgn0086370 |
| FBgn0034143 | FBgn0019890 |             | FBgn0028685 |
| FBgn0033439 | FBgn0032707 |             | FBgn0028954 |
| FBgn0030839 | FBgn0000567 |             | FBgn0261014 |
| FBgn0050441 | FBgn0039789 |             | FBgn0033891 |
| FBgn0038681 | FBgn0040273 |             | FBgn0031544 |
| FBgn0038068 | FBgn0037534 |             | FBgn0033187 |
| FBgn0000592 | FBgn0001565 |             | FBgn0033669 |
| FBgn0058178 | FBgn0020389 |             | FBgn0032596 |
| FBgn0029768 | FBgn0029689 |             | FBgn0015776 |
| FBgn0039343 | FBgn0039882 |             | FBgn0011770 |
| FBgn0029924 | FBgn0034070 |             | FBgn0037232 |

FBgn0030451 FBgn0035157  
FBgn0044872 FBgn0034030  
FBgn0032382 FBgn0001225  
FBgn0036168 FBgn0261565  
FBgn0054054 FBgn0034938  
FBgn0032658 FBgn0036768  
FBgn0016047 FBgn0001150  
FBgn0029863 FBgn0250791  
FBgn0010039 FBgn0052843  
FBgn0039748 FBgn0031031  
FBgn0034511 FBgn0001977  
FBgn0033451 FBgn0263973  
FBgn0032000 FBgn0261548  
FBgn0025740 FBgn0036769  
FBgn0010041 FBgn0259176  
FBgn0037167 FBgn0035906  
FBgn0086691 FBgn0030186  
FBgn0032420 FBgn0250869  
FBgn0044011 FBgn0019952  
FBgn0039099 FBgn0031645  
FBgn0010398 FBgn0035640  
FBgn0264776 FBgn0034577  
FBgn0053307 FBgn0039131  
FBgn0085816 FBgn0021760  
FBgn0036146 FBgn0016794  
FBgn0052115 FBgn0267252  
FBgn0004554 FBgn0035802  
FBgn0028418 FBgn0262000  
FBgn0038795 FBgn0031058  
FBgn0050151 FBgn0051815  
FBgn0064237 FBgn0037060  
FBgn0264815 FBgn0051658  
FBgn0052212 FBgn0029930  
FBgn0052228 FBgn0036986  
FBgn0034276 FBgn0039054  
FBgn0039241 FBgn0039483  
FBgn0051556 FBgn0034181  
FBgn0037696 FBgn0035521  
FBgn0027521 FBgn0029814  
FBgn0035880 FBgn0031850  
FBgn0036660 FBgn0035164  
FBgn0032834 FBgn0039187  
FBgn0041710 FBgn0004901  
FBgn0038598 FBgn0010497  
FBgn0030926 FBgn0028394  
FBgn0015872 FBgn0263598  
FBgn0030348 FBgn0023181  
FBgn0040509 FBgn0035954  
FBgn0033644 FBgn0039809  
FBgn0262719 FBgn0001186  
FBgn0250904 FBgn0013759  
FBgn0039613 FBgn0050279  
FBgn0000473 FBgn0000014  
FBgn0264560 FBgn0033303  
FBgn0030510 FBgn0037890  
FBgn0039593 FBgn0030163  
FBgn0013949 FBgn0036282  
FBgn0039073 FBgn0052813  
FBgn0052407 FBgn0038641  
FBgn0038130 FBgn0051038  
FBgn0023520 FBgn0261570  
FBgn0036529 FBgn0035246  
FBgn0051677 FBgn0027866  
FBgn0040377 FBgn0002922  
FBgn0030558 FBgn0038181  
FBgn0040734 FBgn0051451  
FBgn0030347 FBgn0002069  
FBgn0085354 FBgn0020653  
FBgn0015038 FBgn0019960  
FBgn0026144 FBgn0014032  
FBgn0032726 FBgn0086442

FBgn0036546  
FBgn0029503  
FBgn0037749  
FBgn0028690  
FBgn0032234  
FBgn0041789  
FBgn0031670  
FBgn0028622  
FBgn0037018  
FBgn0001995  
FBgn0259725  
FBgn0038569  
FBgn0033005  
FBgn0263983  
FBgn0030403  
FBgn0029594  
FBgn0027865  
FBgn0038143  
FBgn0262562  
FBgn0037670  
FBgn0039153  
FBgn0038519  
FBgn0052699  
FBgn0263606  
FBgn0038462  
FBgn0032455  
FBgn0011335  
FBgn0032217  
FBgn0034072  
FBgn0066114  
FBgn0026080  
FBgn0011016  
FBgn0001125  
FBgn0004028  
FBgn0028648  
FBgn0036843  
FBgn0044510  
FBgn0250732  
FBgn0035252  
FBgn0004432  
FBgn0033062  
FBgn0035911  
FBgn0031057  
FBgn0015571  
FBgn0010551  
FBgn0025700  
FBgn0086605  
FBgn0028684  
FBgn0033812  
FBgn0029676  
FBgn0261353  
FBgn0028687  
FBgn0011202  
FBgn0250746  
FBgn0033916  
FBgn0031600

FBgn0058119 FBgn0020521  
FBgn0052368 FBgn0035208  
FBgn0037975 FBgn0085407  
FBgn0037389 FBgn0262593  
FBgn0051826 FBgn0032024  
FBgn0032336 FBgn0033578  
FBgn0042129 FBgn0039523  
FBgn0034329 FBgn0041096  
FBgn0040582 FBgn0038180  
FBgn0050083 FBgn0260936  
FBgn0037424 FBgn0039820  
FBgn0267585 FBgn0028487  
FBgn0000079 FBgn0051781  
FBgn0033683 FBgn0032264  
FBgn0085453 FBgn0028496  
FBgn0050098 FBgn0028467  
FBgn0040532 FBgn0039346  
FBgn0035903 FBgn0263974  
FBgn0032801 FBgn0034618  
FBgn0035608 FBgn0263602  
FBgn0033139 FBgn0027082  
FBgn0058115 FBgn0263980  
FBgn0263396 FBgn0034049  
FBgn0040964 FBgn0266411  
FBgn0023090 FBgn0036364  
FBgn0053459 FBgn0261262  
FBgn0039486 FBgn0053513  
FBgn0035154 FBgn0036180  
FBgn0044810 FBgn0043900  
FBgn0031558 FBgn0036690  
FBgn0010043 FBgn0037845  
FBgn0051248 FBgn0086346  
FBgn0039239 FBgn0039758  
FBgn0260855 FBgn0038285  
FBgn0035725 FBgn0038294  
FBgn0030369 FBgn0034688  
FBgn0033174 FBgn0002021  
FBgn0035670 FBgn0259226  
FBgn0039297 FBgn0033426  
FBgn0034354 FBgn0051344  
FBgn0061209 FBgn0033827  
FBgn0260959 FBgn0262614  
FBgn0030105 FBgn0036876  
FBgn0062928 FBgn0034259  
FBgn0035806 FBgn0002733  
FBgn0267339 FBgn0028689  
FBgn0051606 FBgn0034860  
FBgn0053474 FBgn0265002  
FBgn0053510 FBgn0031716  
FBgn0053503 FBgn0002936  
FBgn0050090 FBgn0024352  
FBgn0040832 FBgn0050263  
FBgn0054021 FBgn0004907  
FBgn0037396 FBgn0036576  
FBgn0039900 FBgn0267337  
FBgn0062961 FBgn0086655  
FBgn0034328 FBgn0039107  
FBgn0036125 FBgn0083979  
FBgn0005670 FBgn0026756  
FBgn0036972 FBgn0038925  
FBgn0267363 FBgn0035824  
FBgn0053093 FBgn0038871  
FBgn0038914 FBgn0028421  
FBgn0027584 FBgn0037360  
FBgn0013772 FBgn0036510  
FBgn0052483 FBgn0004876  
FBgn0033408  
FBgn0039665  
FBgn0037207  
FBgn0086362  
FBgn0024556

FBgn0035424  
FBgn0013811  
FBgn0016698  
FBgn0010424  
FBgn0037203  
FBgn0052418  
FBgn0038649  
FBgn0015320  
FBgn0032790  
FBgn0259721  
FBgn0031528  
FBgn0035715  
FBgn0003257  
FBgn0032818  
FBgn0037293  
FBgn0053969  
FBgn0264449  
FBgn0038238  
FBgn0015019  
FBgn0002441  
FBgn0029920  
FBgn0259818  
FBgn0035313  
FBgn0032168  
FBgn0004118  
FBgn0000083  
FBgn0259174  
FBgn0003890  
FBgn0033447  
FBgn0031772  
FBgn0034392  
FBgn0259215  
FBgn0039681  
FBgn0061469  
FBgn0037819  
FBgn0011288  
FBgn0028746  
FBgn0050502  
FBgn0033853  
FBgn0020391  
FBgn0035904  
FBgn0045862  
FBgn0034982  
FBgn0032811  
FBgn0058211  
FBgn0085208  
FBgn0034792  
FBgn0053527  
FBgn0030915  
FBgn0032961  
FBgn0000210  
FBgn0034067  
FBgn0038170  
FBgn0263025  
FBgn0013812  
FBgn0031765  
FBgn0265998  
FBgn0033226  
FBgn0265042  
FBgn0035769  
FBgn0027329  
FBgn0036117  
FBgn0035243  
FBgn0037698  
FBgn0038402  
FBgn0040493  
FBgn0040636  
FBgn0266673  
FBgn0003887  
FBgn0039111  
FBgn0036762

FBgn0035333  
FBgn0037566  
FBgn0030552  
FBgn0031321  
FBgn0029719  
FBgn0053180  
FBgn0027090  
FBgn0261243  
FBgn0262870  
FBgn0046247  
FBgn0038870  
FBgn0085346  
FBgn0030482  
FBgn0029971  
FBgn0032147  
FBgn0259145  
FBgn0039403  
FBgn0264443  
FBgn0085414  
FBgn0027596  
FBgn0036764  
FBgn0033918  
FBgn0039909  
FBgn0035046  
FBgn0033713  
FBgn0026619  
FBgn0040228  
FBgn0014143  
FBgn0013983  
FBgn0042174  
FBgn0039319  
FBgn0027287  
FBgn0036036  
FBgn0261244  
FBgn0031771  
FBgn0015247  
FBgn0085383  
FBgn0085390  
FBgn0027779  
FBgn0027615  
FBgn0037913  
FBgn0031912  
FBgn0033905  
FBgn0031100  
FBgn0266064  
FBgn0261356  
FBgn0003884  
FBgn0003174  
FBgn0032393  
FBgn0023001  
FBgn0036728  
FBgn0001316  
FBgn0033241  
FBgn0267376  
FBgn0031651  
FBgn0030672  
FBgn0086532  
FBgn0260944  
FBgn0002567  
FBgn0264694  
FBgn0052683
